# Supplementary material for: Confirmation of the stereochemistry of spiroviolene
Source: publisher site journal article supplement (doi:10.3762/bjoc.20.77), 2024-04-18
Supplement: Additional file 1 [file 1860-5397-20-77-S1.pdf]

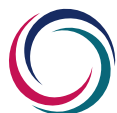

## Supporting Information

for

### Confirmation of the stereochemistry of spiroviolene

Yao Kong, Yuanning Liu, Kaibiao Wang, Tao Wang, Chen Wang, Ben Ai, Hongli Jia, Guohui Pan, Min Yin and Zhengren Xu

*Beilstein J. Org. Chem.* **2024**, *20*, 852–858. [doi:10.3762/bjoc.20.77](https://doi.org/10.3762/bjoc.20.77)

### Materials, synthetic methods, and copies of NMR spectra for all compounds

## Table of Contents

|                                                                                                |         |
|------------------------------------------------------------------------------------------------|---------|
| <b>Material and Methods</b>                                                                    | S2–S3   |
| <b>Derivatization of spiroviolene for X-ray diffraction</b>                                    | S3–S4   |
| <b>Tables S1–S2: Strains, plasmids, and primers used in this study</b>                         | S5      |
| <b>Table S3: <sup>1</sup>H NMR data of spiroviolene (1)</b>                                    | S6      |
| <b>Table S4: <sup>13</sup>C NMR data of spiroviolene (1)</b>                                   | S7      |
| <b>Table S5: <sup>1</sup>H NMR data of compounds 9-11</b>                                      | S8      |
| <b>Table S6: <sup>13</sup>C NMR data of compounds 9-11</b>                                     | S9      |
| <b>Figure S1: Key <sup>1</sup>H-<sup>1</sup>H COSY, HMBC and NOESY correlations of 1, 9–11</b> | S10     |
| <b>Figures S2a–S2g: NMR spectra of spiroviolene (1) in C<sub>6</sub>D<sub>6</sub></b>          | S11–S17 |
| <b>Figures S3a–S3g: NMR spectra of spiroviolene (1) in CDCl<sub>3</sub></b>                    | S18–S24 |
| <b>Figures S4a–S4g: NMR spectra of compound 9 in CDCl<sub>3</sub></b>                          | S25–S31 |
| <b>Figures S5a–S5g: NMR spectra of compound 11 in CDCl<sub>3</sub></b>                         | S32–S38 |
| <b>Figures S6a–S6g: NMR spectra of compound 10 in CDCl<sub>3</sub></b>                         | S39–S45 |
| <b>Figures S7a–S7c: NMR spectra of compound 12 in CDCl<sub>3</sub></b>                         | S46–S48 |
| <b>Figures S8a–S8c: NMR spectra of compound 13 in CDCl<sub>3</sub></b>                         | S49–S51 |
| <b>References</b>                                                                              | S52     |

## Materials and Methods

### Bacterial strains, plasmids, chemicals

Strains, plasmids, and PCR primers used in this study are listed in Tables S1 and S2. PCR primers were purchased from Ruibiotech (Beijing). KOD One™ PCR Master Mix (Toyobo Co., Ltd.), Gibson Assembly Kit (TransGen) were purchased from corresponding commercial suppliers and reactions were performed according to the manufacturer's protocols. DNA gel extraction and plasmid preparation kits were purchased from TransGen. DNA sequencing was conducted by Majorbio. Other common chemicals, bio-chemical, and media components were purchased from standard commercial sources.

### General procedures

*E. coli* strains harboring plasmids were grown in lysogeny broth (LB) with appropriate antibiotics. *Streptomyces violens* CGMCC 4.1786 was cultivated on solid ISP4 medium for sporulation. Actinomycetes were cultivated in liquid tryptic soy broth (TSB) at 28 °C to prepare the mycelium for genomic DNA (gDNA) isolation. Isolation of gDNA from Actinomycetes strains were performed using the salting out protocol.<sup>[1]</sup>

IR spectra were collected with a Nicolet Nexus 470 spectrometer. Optical rotation was recorded with a Rudolph Autopol VI digital Polarimeter. GC–MS data were collected on an Agilent 7890A/5975C GC–MS apparatus with a DB-5MS column (30 m × 0.25 mm × 0.25 μm). All <sup>1</sup>H, <sup>13</sup>C, and 2D-NMR (HSQC, <sup>1</sup>H-<sup>1</sup>H COSY, HMBC, NOESY) spectra were collected at room temperature (25 °C) with a Bruker AVANCE III 400 at 400 MHz for <sup>1</sup>H and 100 MHz for <sup>13</sup>C nuclei, or a Bruker Avance III 600 at 600 MHz for <sup>1</sup>H and 150 MHz for <sup>13</sup>C nuclei. Chemical shifts were calibrated with the solvent residue signals ( $\delta$  CDCl<sub>3</sub>: 7.26, 77.16; C<sub>6</sub>D<sub>6</sub>: 7.16, 128.06 for <sup>1</sup>H and <sup>13</sup>C NMR spectra). HR-ESI-MS data were acquired on a Waters XEVO G2 QTOF instrument. Melting point was recorded with a BÜCHI M-560 melting point apparatus.

Single-crystal X-ray diffraction data collection of **13** was measured on a Rigaku Oxford Diffraction XtaLAB Synergy four-circle diffractometer equipped with a microfocus Cu K $\alpha$  X-ray source (1.54184 Å, PhotonJet-R 1200W) and a HyPix-6000C area detector. The sample crystal was cooled to 100 K using a cold nitrogen stream (Cobra by Oxford Cryosystems). Data reduction, cell refinement and experimental absorption correction were performed in CrysAlisPro<sup>[2]</sup>. Crystal data: C<sub>26</sub>H<sub>36</sub>N<sub>4</sub>O<sub>4</sub>, *M* = 468.59, monoclinic, space group *C* 2y; unit cell dimensions were determined to be *a* = 18.5331 (3) Å, *b* = 8.16904 (10), *c* = 33.4838 (4),  $\alpha$  = 90°,  $\beta$  = 102.1517 (13)°,  $\gamma$  = 90°, *V* = 4955.78 (12) Å<sup>3</sup>, *Z* = 8, *D*<sub>x</sub> = 1.256 g/cm<sup>3</sup>, *F*(000) = 2016.0,  $\mu$  (Cu K $\alpha$ ) = 1.542 mm<sup>-1</sup>. 31246 reflections were collected until  $\theta_{\max}$  = 72.095°, in which independent unique 9556 reflections were observed [*F*<sup>2</sup> > 4 $\sigma$  (*F*<sup>2</sup>)]. The final refinement of all data gave *R* = 0.0380, *wR*<sub>2</sub> = 0.0342, and *S* = 1.024. Structure solution, refinement, and data output were performed with the OLEX2 program package<sup>[3]</sup> using SHELXL-2014<sup>[4]</sup> for the refinement. Multi-scan method was used for the absorption correction. Structures were solved by direct methods and refined against *F*<sup>2</sup> by full-matrix least-squares. All non-hydrogen atoms were refined anisotropically. Hydrogen atoms were generated geometrically at idealized position and constrained to ride on their parent. The crystallographic data for this paper were deposited in CCDC database with codes of 2274944.

### Cloning SvS-coding gene from *Streptomyces violens*

To construct plasmid for production of terpene cyclase SvS for spiroviolene production, the region coding for svS was PCR amplified from the gDNA of *S. violens* CGMCC 4.1786 using primers as listed in Table S2. The gel-recovered DNA fragment was clone into pET28a using Gibson Assembly Kit to give pET28a-svS, which was co-transformed with pCDFDuet-TIIAE into *E. coli* BL21(DE3) for spiroviolene production.

### Production of spiroviolene

A single colony of the transformant was collected from the plate and inoculated into 100 mL of LB medium containing streptomycin (50  $\mu\text{g/mL}$ ) and kanamycin (50  $\mu\text{g/mL}$ ). The seed culture was allowed to shake at 37  $^{\circ}\text{C}$  overnight, and 10 mL of which was inoculated into a 2L-flask containing 1L of modified TB medium (12 g/L tryptone, 24 g/L yeast extract and 20 g/L glycerol). The resultant culture was allowed to grow at 37  $^{\circ}\text{C}$  with a shaking speed of 200 rpm until  $\text{OD}_{600}$  reached 0.6. Isopropyl- $\beta$ -D-thiogalactopyranoside (IPTG, 0.5 mM), prenol (400  $\mu\text{L/L}$ ) and isoprenol (400  $\mu\text{L/L}$ ) were added to the culture. The resultant culture was fermented at 18  $^{\circ}\text{C}$  with a speed of 200 rpm for 72 h.

### Purification of spiroviolene

EtOAc (500 mL) was added to the fermentation broth (1 L), and the mixture was filtered through a pad of Celite. The separated aqueous phase was extracted with EtOAc (2  $\times$  500 mL). The combined organic layers were dried over  $\text{Na}_2\text{SO}_4$ , and the solvent was evaporated under reduced pressure. The crude product was purified by flash chromatography on silica gel, and eluted with petroleum ether (PE) to yield spiroviolene (**1**) as a colorless oil (40 mg/L).  $R_f = 0.97$  (pure PE);  $[\alpha]_{\text{D}}^{20} -4.5$  (c 0.2,  $\text{C}_6\text{D}_6$ ) ( $[\alpha]_{\text{D}} -5.6$  (c 0.2,  $\text{C}_6\text{D}_6$ )<sup>[5]</sup>;  $[\alpha]_{\text{D}} -5.4$  (c 0.2,  $\text{C}_6\text{D}_6$ )<sup>[6]</sup>); IR (neat)  $\nu_{\text{max}}$  2927, 2865, 1462  $\text{cm}^{-1}$ ;  $^1\text{H}$ - and  $^{13}\text{C}$ -NMR data are listed in Table S3-4.

### Derivatization of spiroviolene for X-ray diffraction

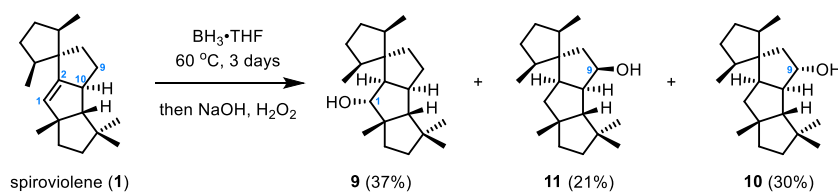

Spiroviolene (**1**, 72.0 mg, 0.26 mmol, 1.0 equiv) was dissolved in  $\text{BH}_3 \cdot \text{THF}$  complex (1.0 M in THF, 2.0 mL, 7.7 equiv), and the reaction mixture was heated at 60  $^{\circ}\text{C}$  under nitrogen atmosphere for 3 days. To the resultant reaction mixture at room temperature was added 20% aq. solution of  $\text{NaOH}$  (5.0 mL) and 30% aq. solution of  $\text{H}_2\text{O}_2$  (5.0 mL). The reaction mixture was allowed to stir at room temperature for 2 h. The mixture was extracted with  $\text{CH}_2\text{Cl}_2$  (15 mL  $\times$  3). The combined organic layers were dried over  $\text{Na}_2\text{SO}_4$  and evaporated to dryness. The resultant residue was purified with silica gel chromatography (PE/EtOAc = 20:1) to give recovered spiroviolene (7.0 mg, 10%), 1 $\alpha$ -hydroxy-spiroviolane **9** (28.0 mg, 37%), 9 $\beta$ -hydroxy-spiroviolane **11** (16.0 mg, 21%) and 9 $\alpha$ -hydroxy-spiroviolane **10** (23.0 mg, 30%), respectively.

**1 $\alpha$ -Hydroxyspiroviolane (9):** Colorless oil;  $R_f = 0.64$  (PE/EtOAc = 10:1);  $[\alpha]_{\text{D}}^{20} -60$  (c 0.1,  $\text{CHCl}_3$ ); IR (neat)  $\nu_{\text{max}}$  3501, 2952, 2872, 1464, 1378  $\text{cm}^{-1}$ ;  $^1\text{H}$ -NMR and  $^{13}\text{C}$ -NMR data are listed in Tables S5-6; HR-ESI-MS  $m/z$  289.2533  $[\text{M} - \text{H}]^-$  (calcd. for  $\text{C}_{20}\text{H}_{33}\text{O}^-$ , 289.2537).

**9 $\beta$ -Hydroxyspiroviolane (11):** Colorless oil;  $R_f = 0.48$  (PE/EtOAc = 10:1);  $[\alpha]_{\text{D}}^{20} -46$  (c 0.2,  $\text{CHCl}_3$ ); IR (neat)  $\nu_{\text{max}}$  3414, 2947, 2868, 1460, 1378  $\text{cm}^{-1}$ ;  $^1\text{H}$ -NMR and  $^{13}\text{C}$ -NMR data are listed in Tables S5-6; HR-ESI-MS  $m/z$  289.2537  $[\text{M} - \text{H}]^-$  (calcd. for  $\text{C}_{20}\text{H}_{33}\text{O}^-$ , 289.2537).

**9 $\alpha$ -Hydroxyspiroviolane (10):** Colorless oil;  $R_f = 0.36$  (PE/EtOAc = 10:1);  $[\alpha]_{\text{D}}^{20} -49$  (c 0.1,  $\text{CHCl}_3$ ); IR (neat)  $\nu_{\text{max}}$  3341, 2949, 2868, 1459, 1378  $\text{cm}^{-1}$ ;  $^1\text{H}$ -NMR and  $^{13}\text{C}$ -NMR data are listed in Tables S5-6; HR-ESI-MS  $m/z$  289.2537  $[\text{M} - \text{H}]^-$  (calcd. for  $\text{C}_{20}\text{H}_{33}\text{O}^-$ , 289.2537).

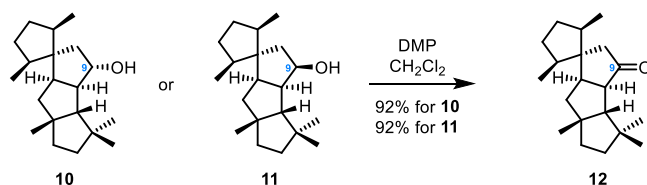

**9-Oxospiroviolane (12):** To a stirring solution of 9 $\alpha$ -hydroxy-spiroviolane (**10**, 6.0 mg, 0.021 mmol, 1.0 equiv) in CH<sub>2</sub>Cl<sub>2</sub> (2.0 mL) at room temperature was added Dess-Martin Periodinane (10.7 mg, 0.025 mmol, 1.2 equiv). The reaction mixture was stirred at room temperature until TLC analysis showed the full consumption of the starting material. The reaction was quenched by addition of sat. aq. NaHCO<sub>3</sub> solution (2.0 mL), and the mixture was extracted with CH<sub>2</sub>Cl<sub>2</sub> (5 mL  $\times$  3). The combined organic layers were dried over Na<sub>2</sub>SO<sub>4</sub>, and evaporated to dryness. The crude product was purified with silica gel chromatography (CH<sub>2</sub>Cl<sub>2</sub>/MeOH = 25:1) to yield **12** (5.6 mg, 92%) as a colorless oil.  $R_f$  = 0.53 (PE/EtOAc = 10:1);  $[\alpha]^{20}_D$  +25 (c 0.1, CHCl<sub>3</sub>); IR (neat)  $\nu_{\text{max}}$  2953, 2869, 1740, 1460, 1379 cm<sup>-1</sup>; <sup>1</sup>H-NMR (400 MHz, CDCl<sub>3</sub>)  $\delta$  2.73 (dt,  $J$  = 11.1, 7.5 Hz, 1H), 2.38 (d,  $J$  = 7.2 Hz, 1H), 2.14-2.13 (m, 2H), 2.11-2.05 (m, 1H), 1.95-1.91 (m, 1H), 1.91-1.82 (m, 2H), 1.77-1.66 (m, 2H), 1.62-1.58 (m, 2H), 1.50-1.44 (m, 4H), 1.30-1.26 (m, 1H), 1.10 (s, 3H), 1.07 (s, 3H), 1.07 (d,  $J$  = 7.3 Hz, 3H), 1.01 (d,  $J$  = 7.2 Hz, 3H), 0.95 (s, 3H); <sup>13</sup>C-NMR (100 MHz, CDCl<sub>3</sub>)  $\delta$  223.3, 63.7, 58.8, 52.7 (2C), 52.1, 45.6, 45.0, 43.0, 42.54, 42.52, 42.0, 40.5, 32.4, 31.8, 31.1, 30.7, 26.2, 20.7, 18.0; HR-ESI-MS  $m/z$  289.2535 [M + H]<sup>+</sup> (calcd. for C<sub>20</sub>H<sub>33</sub>O<sup>+</sup>, 289.2526).

9 $\beta$ -Hydroxyspiroviolane (**11**) was also transformed into **12** in the same yield (92%) by using the same conditions as that of **10**.

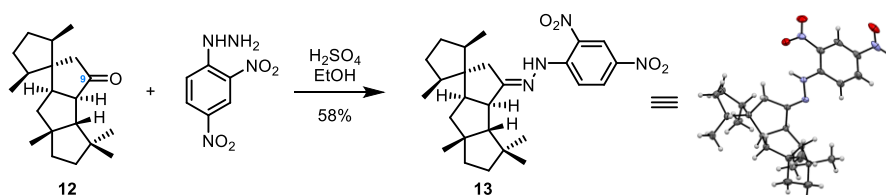

**Compound 13**<sup>[7]</sup>: Solid 2,4-dinitrophenylhydrazine (55.5 mg, 0.28 mmol, 4.0 equiv) and conc. H<sub>2</sub>SO<sub>4</sub> (2.0 mL) were mixed and stirred at room temperature for 10 min to dissolve all the solid. To the resultant reaction mixture with stirring was added a solution of **12** (21.0 mg, 0.07 mmol, 1.0 equiv) in 95% EtOH (2.0 mL) dropwise. The reaction mixture was allowed to stir at room temperature for 30 min until the precipitation of brownish-yellow solid was observed. The mixture was filtered off, and the solid was washed with EtOH (~2 mL). The solid was desiccated to afford **13** (19.0 mg, 0.04 mmol, 58%) as a brownish-yellow solid.  $R_f$  = 0.53 (PE/EtOAc = 10:1); m.p. 164-168 °C (brownish-yellow needle crystal, PE/CH<sub>2</sub>Cl<sub>2</sub>, 5:1);  $[\alpha]^{20}_D$  +133 (c 0.1, CHCl<sub>3</sub>); IR (neat)  $\nu_{\text{max}}$  3315, 2954, 2919, 2869, 1619, 1591, 1337 cm<sup>-1</sup>; <sup>1</sup>H-NMR (400 MHz, CDCl<sub>3</sub>)  $\delta$  10.75 (br s, 1H), 9.13 (d,  $J$  = 2.6 Hz, 1H), 8.31 (dd,  $J$  = 9.6, 2.6 Hz, 1H), 7.94 (d,  $J$  = 9.6 Hz, 1H), 2.95 (d,  $J$  = 6.5 Hz, 1H), 2.65 (dt,  $J$  = 11.1, 7.3 Hz, 1H), 2.44-2.29 (m, 2H), 2.19-2.09 (m, 2H), 1.92-1.87 (m, 2H), 1.86-1.79 (m, 1H), 1.68-1.56 (m, 3H), 1.57-1.45 (m, 4H), 1.25-1.19 (m, 1H), 1.16 (s, 3H), 1.11 (s, 3H), 1.07 (d,  $J$  = 7.2 Hz, 3H), 1.06 (s, 3H), 1.02 (d,  $J$  = 7.1 Hz, 3H); <sup>13</sup>C-NMR (100 MHz, CDCl<sub>3</sub>)  $\delta$  171.1, 145.1, 137.7, 130.2, 128.9, 123.7, 116.4, 66.5, 56.0, 53.5, 52.8, 47.0, 44.7, 42.9, 42.8, 42.6 (2C), 42.1, 40.7, 32.4, 31.7, 31.5, 31.2, 26.3, 20.5, 18.4; HR-ESI-MS  $m/z$  469.2808 [M + H]<sup>+</sup> (calcd. for C<sub>26</sub>H<sub>37</sub>N<sub>4</sub>O<sub>4</sub><sup>+</sup>, 469.2809).

**Table S1.** Strains and plasmids used in this study

| Plasmids/Strains                            | Relevant Characteristic                                                                                                                       | Source                            |
|---------------------------------------------|-----------------------------------------------------------------------------------------------------------------------------------------------|-----------------------------------|
| pCDFDeut-TIIAE                              | pCDFDuet-1 derived plasmid for the production of GGPP, harboring gene <i>EcTHIM</i> , <i>MjIPK</i> , <i>idi</i> , <i>ispA</i> and <i>crtE</i> | This study                        |
| pET28a-svs                                  | pET28a(+) derived plasmid for the production of spiroviolene, harboring SvS-coding gene                                                       | This study                        |
| <i>Streptomyces violens</i><br>CGMCC 4.1786 | Bacteria for cloning SvS-coding gene                                                                                                          | CGMCC                             |
| <i>E. coli</i> Trans1T1                     | <i>E. coli</i> host for general cloning                                                                                                       | Beijing TransGen Biotech Co., Ltd |
| <i>E. coli</i> BL21 (DE3)                   | <i>E. coli</i> host for protein expression and fermentation                                                                                   | Beijing TransGen Biotech Co., Ltd |

**Table S2.** Primers used in this study

| Primers | Sequence (5'-3')                             | Purpose                                      |
|---------|----------------------------------------------|----------------------------------------------|
| 1316-F  | TGGTGCCGCGCGGCAGCCATatggccatgaccgtcaacgagatc | Forward primer for cloning SvS-coding gene   |
| 1316-R  | TCGAGTGCGGCCGCAAGCTTtcaaactccgagcagcgcgtc    | Reverse primer for cloning SvS-coding gene   |
| 28a-F   | AAGCTTGCGGCCGCACTCGA                         | Forward primer for linearizing pET28a vector |
| 28a-R   | ATGGCTGCCGCGCGGCACCA                         | Reverse primer for linearizing pET28a vector |

**Table S3.** <sup>1</sup>H NMR data of spiroviolene in comparison with those of reported

| No. | Our Isolated Spiroviolene                          |                                                    | Spiroviolene <sup>[5,8]</sup>                      |
|-----|----------------------------------------------------|----------------------------------------------------|----------------------------------------------------|
|     | $\delta_{\text{H}}$ , multi (J in Hz) <sup>a</sup> | $\delta_{\text{H}}$ , multi (J in Hz) <sup>b</sup> | $\delta_{\text{H}}$ , multi (J in Hz) <sup>b</sup> |
| 1   | 4.77, d (2.9)                                      | 4.82, d (2.9)                                      | 4.81, d (2.9)                                      |
| 2   | --                                                 | --                                                 | --                                                 |
| 3   | 1.65, m                                            | 1.61, m                                            | 1.60, m                                            |
| 4   | 1.74, m                                            | 1.80, m                                            | 1.79, m                                            |
| 5   | 1.27, m                                            | 1.39, m                                            | 1.38, m                                            |
| 6   | 1.74, m                                            | 1.75, m                                            | 1.74, m                                            |
| 7   | 1.26, m                                            | 1.34, m                                            | 1.33, m                                            |
| 8   | 1.85, m                                            | 1.82, m                                            | 1.81, m                                            |
| 9   | --                                                 | --                                                 | --                                                 |
| 10  | 1.93, td (12.8, 7.0)                               | 1.93, td (12.8, 7.0)                               | 1.92, ddd (12.7, 6.9, 6.9)                         |
| 11  | 1.68, m                                            | 1.70, m                                            | 1.69, m                                            |
| 12  | 1.68, m                                            | 1.73, m                                            | 1.72, m                                            |
| 13  | 1.02, m                                            | 1.09, m                                            | 1.09, dddd (12.2, 12.2, 11.3, 7.6)                 |
| 14  | 2.68, dtd<br>(12.5, 6.4, 2.9)                      | 2.77, dtd<br>(12.6, 6.4, 2.9)                      | 2.77, dddd<br>(12.5, 6.4, 6.4, 2.9)                |
| 15  | --                                                 | --                                                 | --                                                 |
| 16  | 1.67, m                                            | 1.74, m                                            | 1.73, m                                            |
| 17  | 1.55, m                                            | 1.59, m                                            | 1.59, m                                            |
| 18  | 1.55, m                                            | 1.68, m                                            | 1.67, m                                            |
| 19  | 1.39, m                                            | 1.44, m                                            | 1.43, dddd (11.8, 6.6, 1.5, 1.5)                   |
| 20  | 1.53, m                                            | 1.59, m                                            | 1.58, m                                            |
| 21  | --                                                 | --                                                 | --                                                 |
| 22  | 1.02, s                                            | 1.05, s                                            | 1.04, s                                            |
| 23  | 0.99, s                                            | 1.04, s                                            | 1.03, s                                            |
| 24  | 1.29, s                                            | 1.34, s                                            | 1.34, s                                            |
| 25  | 0.88, d (6.7)                                      | 0.98, d (6.8)                                      | 0.97, d (6.7)                                      |
| 26  | 0.86, d (6.6)                                      | 0.95, d (6.8)                                      | 0.94, d (6.7)                                      |

<sup>a</sup>recorded in CDCl<sub>3</sub> (400 MHz); <sup>b</sup>recorded in C<sub>6</sub>D<sub>6</sub> (700 MHz).

**Table S4.**  $^{13}\text{C}$  NMR data of spiroviolene in comparison with those of reported

| No. | Our Isolated Spiroviolene               |                                         | Spiroviolene <sup>[5,8]</sup>           |
|-----|-----------------------------------------|-----------------------------------------|-----------------------------------------|
|     | $\delta_{\text{C}}$ , type <sup>a</sup> | $\delta_{\text{C}}$ , type <sup>b</sup> | $\delta_{\text{C}}$ , type <sup>b</sup> |
| 1   | 128.7, CH                               | 129.0, CH                               | 128.9, CH                               |
| 2   | 148.7, qC                               | 148.9, qC                               | 148.9, qC                               |
| 3   | 44.5, CH                                | 44.7, CH                                | 44.7, CH                                |
| 4   | 31.0, CH <sub>2</sub>                   | 31.3, CH <sub>2</sub>                   | 31.3, CH <sub>2</sub>                   |
| 5   | 30.4, CH <sub>2</sub>                   | 30.7, CH <sub>2</sub>                   | 30.7, CH <sub>2</sub>                   |
| 6   | 46.4, CH                                | 46.6, CH                                | 46.6, CH                                |
| 7   | 53.5, qC                                | 53.8, qC                                | 53.8, qC                                |
| 8   | 39.3, CH <sub>2</sub>                   | 39.6, CH <sub>2</sub>                   | 39.5, CH <sub>2</sub>                   |
| 9   | 32.8, CH <sub>2</sub>                   | 33.1, CH <sub>2</sub>                   | 33.1, CH <sub>2</sub>                   |
| 10  | 59.1, CH                                | 59.4, CH                                | 59.4, CH                                |
| 11  | 63.5, qC                                | 63.7, qC                                | 63.7, qC                                |
| 12  | 38.4, CH <sub>2</sub>                   | 38.6, CH <sub>2</sub>                   | 38.6, CH <sub>2</sub>                   |
| 13  | 40.5, CH <sub>2</sub>                   | 40.8, CH <sub>2</sub>                   | 40.8, CH <sub>2</sub>                   |
| 14  | 65.9, CH                                | 66.1, CH                                | 66.0, CH                                |
| 15  | 41.2, qC                                | 41.3, qC                                | 41.3, qC                                |
| 16  | 29.1, CH <sub>3</sub>                   | 29.2, CH <sub>3</sub>                   | 29.1, CH <sub>3</sub>                   |
| 17  | 26.0, CH <sub>3</sub>                   | 26.1, CH <sub>3</sub>                   | 26.1, CH <sub>3</sub>                   |
| 18  | 32.3, CH <sub>3</sub>                   | 32.4, CH <sub>3</sub>                   | 32.4, CH <sub>3</sub>                   |
| 19  | 15.0, CH <sub>3</sub>                   | 15.2, CH <sub>3</sub>                   | 15.2, CH <sub>3</sub>                   |
| 20  | 15.0, CH <sub>3</sub>                   | 15.1, CH <sub>3</sub>                   | 15.1, CH <sub>3</sub>                   |

<sup>a</sup>recorded in CDCl<sub>3</sub> (100 MHz); <sup>b</sup>recorded in C<sub>6</sub>D<sub>6</sub> (150 MHz).



**Table S5.** <sup>1</sup>H NMR data of 1 $\alpha$ -hydroxyspiroviolane (**9**), 9 $\alpha$ -hydroxyspiroviolane (**10**) and 9 $\beta$ -hydroxy-spiroviolane (**11**).

| No.       | 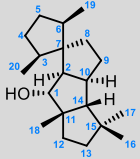 |  |  |
|-----------|-----------------------------------------------------------------------------------|-----------------------------------------------------------------------------------|-------------------------------------------------------------------------------------|
|           | <b>9</b>                                                                          | <b>11</b>                                                                         | <b>10</b>                                                                           |
|           | $\delta_H$ , multi (J in Hz) <sup>a</sup>                                         | $\delta_H$ , multi (J in Hz) <sup>a</sup>                                         | $\delta_H$ , multi (J in Hz) <sup>a</sup>                                           |
| <b>1</b>  | 3.74, d (9.6)                                                                     | 1.74, m                                                                           | 1.71, m                                                                             |
| <b>2</b>  | 2.01, m                                                                           | 1.34, m                                                                           | 1.26, m                                                                             |
| <b>3</b>  | 1.62, m                                                                           | 2.36, dt (11.8, 7.2)                                                              | 2.37, dt (12.4, 7.1)                                                                |
| <b>4</b>  | 2.00, m                                                                           | 1.58, m                                                                           | 2.02, m                                                                             |
|           | 1.41, m                                                                           | 2.03, m                                                                           | 2.05, m                                                                             |
| <b>5</b>  | 1.71, m                                                                           | 1.36, m                                                                           | 1.39, m                                                                             |
|           | 1.41, m                                                                           | 1.71, m                                                                           | 1.67, m                                                                             |
| <b>6</b>  | 1.93, m                                                                           | 1.36, m                                                                           | 1.33, m                                                                             |
|           | --                                                                                | 1.75, m                                                                           | 1.67, m                                                                             |
| <b>7</b>  | --                                                                                | --                                                                                | --                                                                                  |
| <b>8</b>  | 1.54, m                                                                           | 2.05, m                                                                           | 2.00, m                                                                             |
|           | 1.40, m                                                                           | 1.46, m                                                                           | 1.50, m                                                                             |
| <b>9</b>  | 1.94, m                                                                           | 4.20, dt (8.9, 7.1)                                                               | 4.05, ddd (8.8, 5.9, 2.8)                                                           |
|           | 1.20, m                                                                           |                                                                                   |                                                                                     |
| <b>10</b> | 2.16, m                                                                           | 2.27, ddd (8.8, 5.0, 3.5)                                                         | 2.12, t (6.2)                                                                       |
| <b>11</b> | --                                                                                | --                                                                                | --                                                                                  |
| <b>12</b> | 1.94, m                                                                           | 1.59, m                                                                           | 1.55, t (6.9)                                                                       |
|           | 1.20, m                                                                           |                                                                                   |                                                                                     |
| <b>13</b> | 1.49, m                                                                           | 1.50, m                                                                           | 1.43, m                                                                             |
|           | 1.42, m                                                                           | 1.46, m                                                                           |                                                                                     |
| <b>14</b> | 1.40, m                                                                           | 1.78, m                                                                           | 1.68, m                                                                             |
| <b>15</b> | --                                                                                | --                                                                                | --                                                                                  |
| <b>16</b> | 1.04, s                                                                           | 1.05, s                                                                           | 1.04, s                                                                             |
| <b>17</b> | 0.97, s                                                                           | 0.96, s                                                                           | 0.96, s                                                                             |
| <b>18</b> | 1.24, s                                                                           | 1.19, s                                                                           | 1.20, s                                                                             |
|           | 1.12, s                                                                           | 0.93, s                                                                           | 1.01, s                                                                             |
| <b>19</b> | 0.95, s                                                                           | 0.95, s                                                                           | 0.91, s                                                                             |

<sup>a</sup>recorded in CDCl<sub>3</sub> (600 MHz).

**Table S6.**  $^{13}\text{C}$  NMR data of 1 $\alpha$ -hydroxy-spiroviolane (**9**), 9 $\alpha$ -hydroxy-spiroviolane (**10**) and 9 $\beta$ -hydroxy-spiroviolane (**11**).

| No.       | 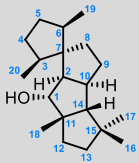 |  |  |
|-----------|-----------------------------------------------------------------------------------|-----------------------------------------------------------------------------------|------------------------------------------------------------------------------------|
|           | $\delta_{\text{C}}$ , type <sup>a</sup>                                           | $\delta_{\text{C}}$ , type <sup>a</sup>                                           | $\delta_{\text{C}}$ , type <sup>a</sup>                                            |
| <b>1</b>  | 82.8, CH                                                                          | 45.5, CH <sub>2</sub>                                                             | 45.0, CH <sub>2</sub>                                                              |
| <b>2</b>  | 53.5, CH                                                                          | 48.3, CH                                                                          | 48.8, CH                                                                           |
| <b>3</b>  | 41.9, CH                                                                          | 42.0, CH                                                                          | 42.6, CH                                                                           |
| <b>4</b>  | 30.9, CH <sub>2</sub>                                                             | 31.9, CH <sub>2</sub>                                                             | 31.6, CH <sub>2</sub>                                                              |
| <b>5</b>  | 32.5, CH <sub>2</sub>                                                             | 32.3, CH <sub>2</sub>                                                             | 32.2, CH <sub>2</sub>                                                              |
| <b>6</b>  | 42.8, CH                                                                          | 42.7, CH                                                                          | 43.4, CH                                                                           |
| <b>7</b>  | 59.1, qC                                                                          | 55.4, qC                                                                          | 58.0, qC                                                                           |
| <b>8</b>  | 38.4, CH <sub>2</sub>                                                             | 50.0, CH <sub>2</sub>                                                             | 49.6, CH <sub>2</sub>                                                              |
| <b>9</b>  | 32.3, CH <sub>2</sub>                                                             | 72.9, CH                                                                          | 81.5, CH                                                                           |
| <b>10</b> | 42.2, CH                                                                          | 50.7, CH                                                                          | 58.5, CH                                                                           |
| <b>11</b> | 56.0, qC                                                                          | 52.8, qC                                                                          | 52.8, qC                                                                           |
| <b>12</b> | 32.3, CH <sub>2</sub>                                                             | 40.7, CH <sub>2</sub>                                                             | 40.9, CH <sub>2</sub>                                                              |
| <b>13</b> | 41.4, CH <sub>2</sub>                                                             | 42.1, CH <sub>2</sub>                                                             | 41.9, CH <sub>2</sub>                                                              |
| <b>14</b> | 66.3, CH                                                                          | 60.0, CH                                                                          | 66.4, CH                                                                           |
| <b>15</b> | 42.9, qC                                                                          | 42.7, qC                                                                          | 42.7, qC                                                                           |
| <b>16</b> | 31.1, CH <sub>3</sub>                                                             | 31.3, CH <sub>3</sub>                                                             | 31.3, CH <sub>3</sub>                                                              |
| <b>17</b> | 25.7, CH <sub>3</sub>                                                             | 26.1, CH <sub>3</sub>                                                             | 26.0, CH <sub>3</sub>                                                              |
| <b>18</b> | 30.5, CH <sub>3</sub>                                                             | 29.3, CH <sub>3</sub>                                                             | 32.0, CH <sub>3</sub>                                                              |
| <b>19</b> | 18.5, CH <sub>3</sub>                                                             | 18.5, CH <sub>3</sub>                                                             | 19.6, CH <sub>3</sub>                                                              |
| <b>20</b> | 19.5, CH <sub>3</sub>                                                             | 20.3, CH <sub>3</sub>                                                             | 18.4, CH <sub>3</sub>                                                              |

<sup>a</sup>recorded in CDCl<sub>3</sub> (150 MHz).

**Figure S1.** Key  $^1\text{H}$ - $^1\text{H}$  COSY, HMBC and NOESY correlations of spiroviolene (**1**),  $1\alpha$ -hydroxy-spiroviolane (**9**),  $9\alpha$ -hydroxyspiroviolane (**10**) and  $9\beta$ -hydroxyspiroviolane (**11**).

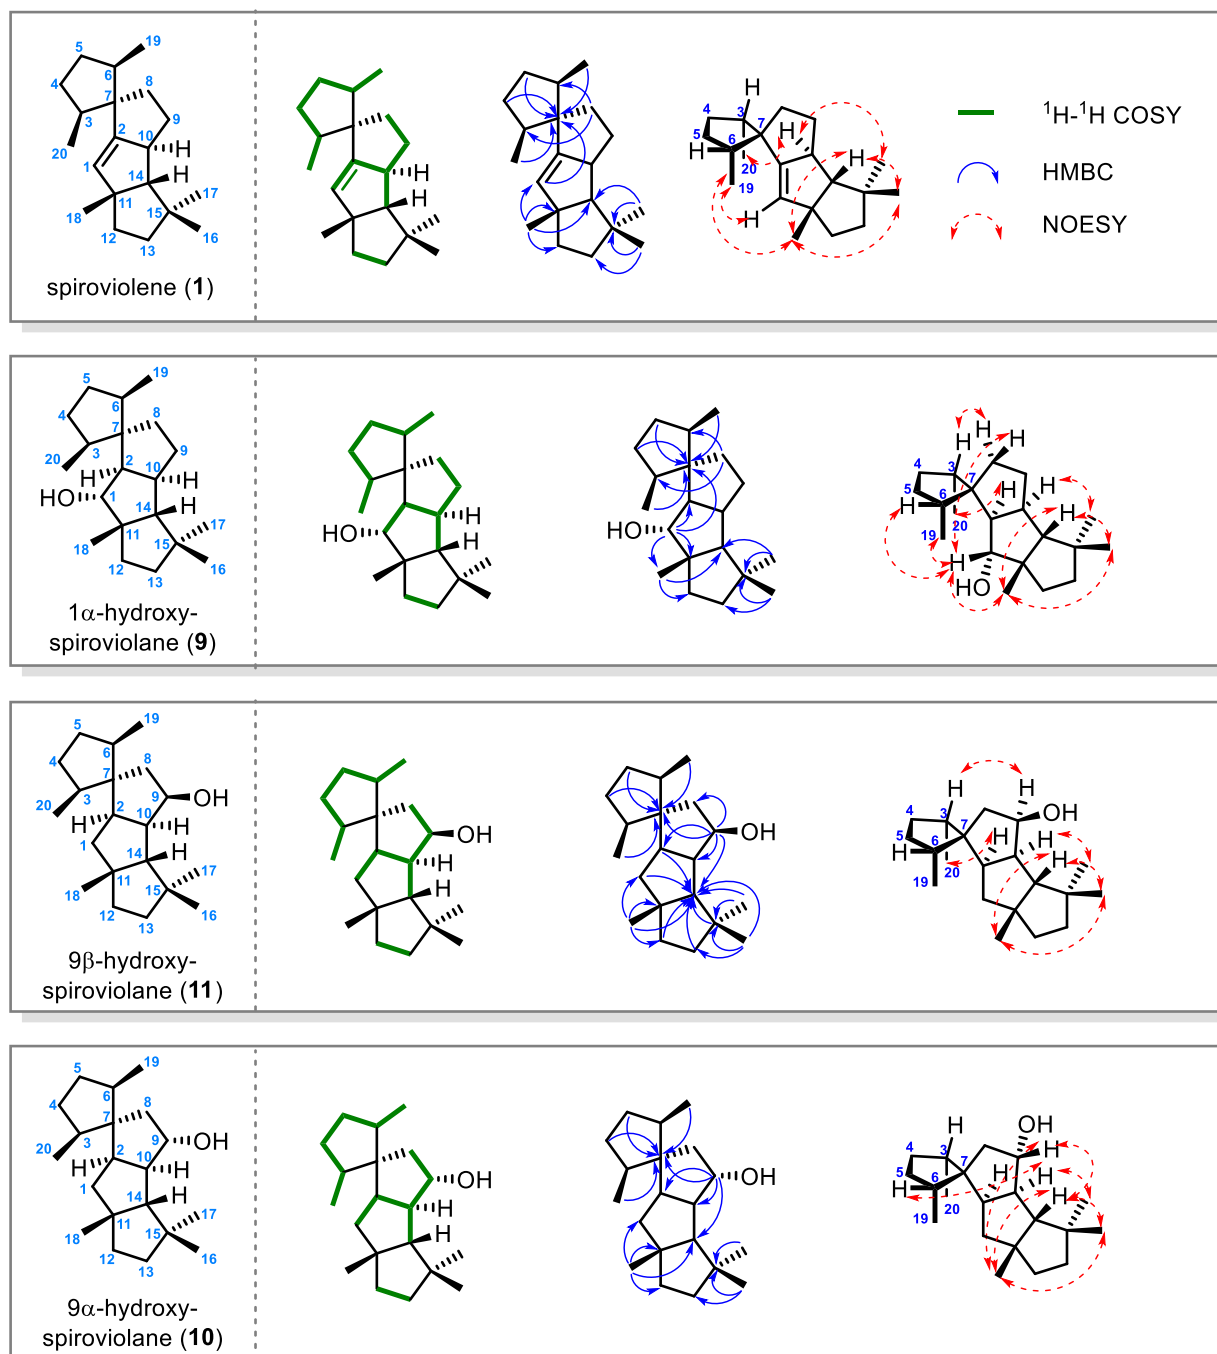

Figure 2a. <sup>1</sup>H NMR spectrum of spiroviolene 1 (600 MHz, C<sub>6</sub>D<sub>6</sub>)

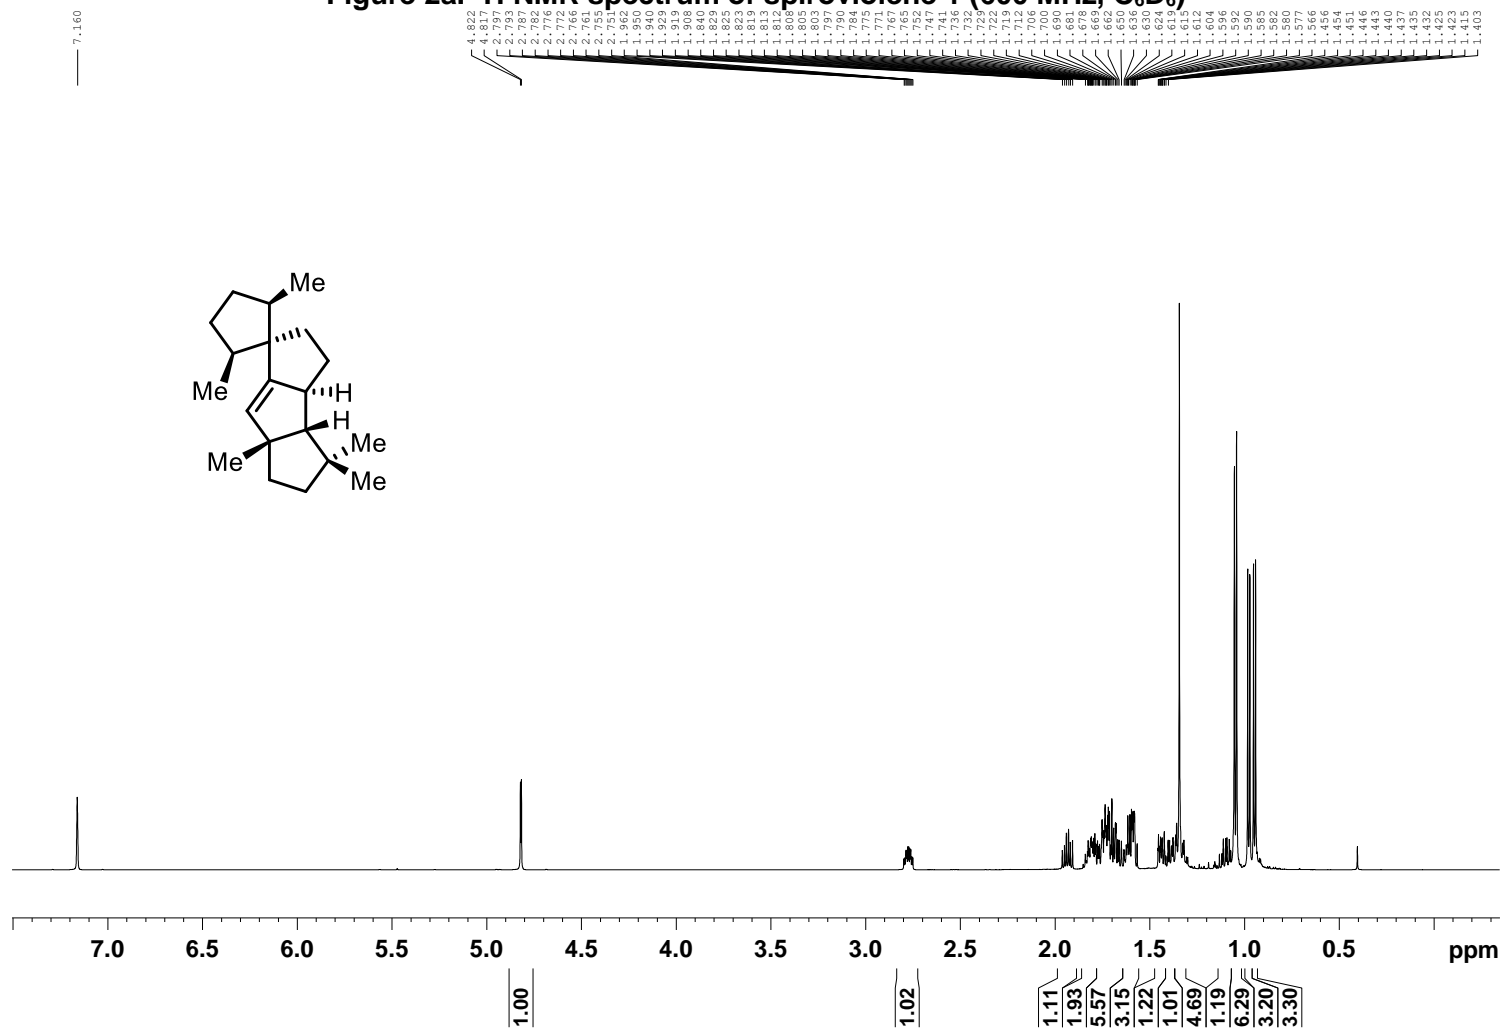

Figure 2b. <sup>1</sup>H NMR spectrum of spiroviolene 1 (600 MHz, C<sub>6</sub>D<sub>6</sub>)

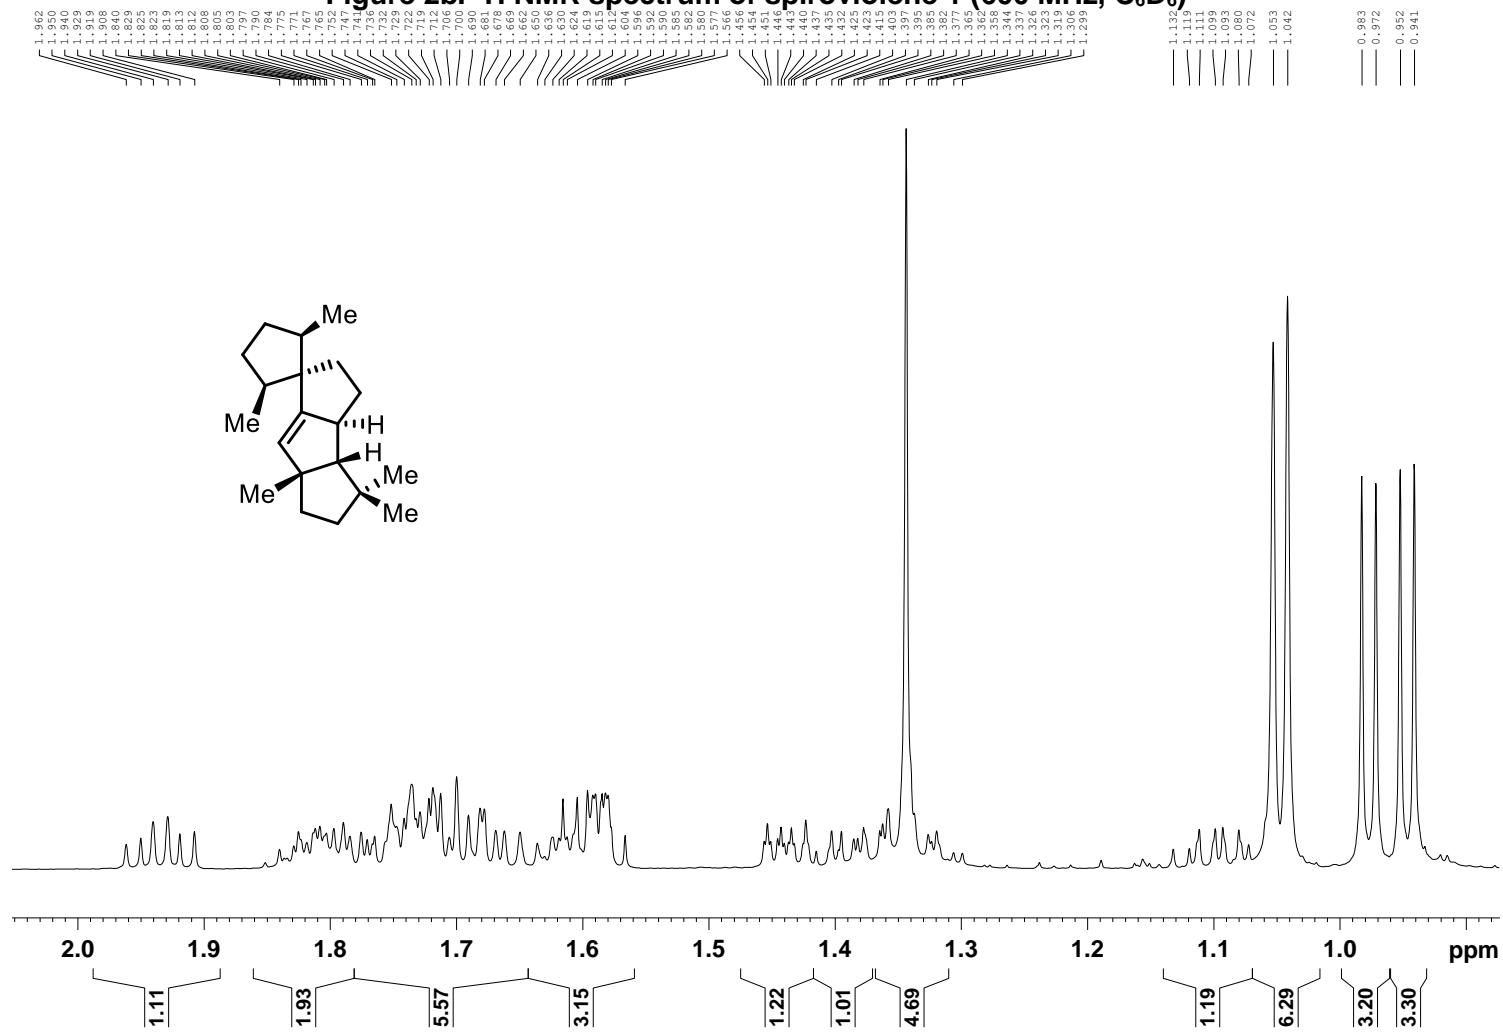

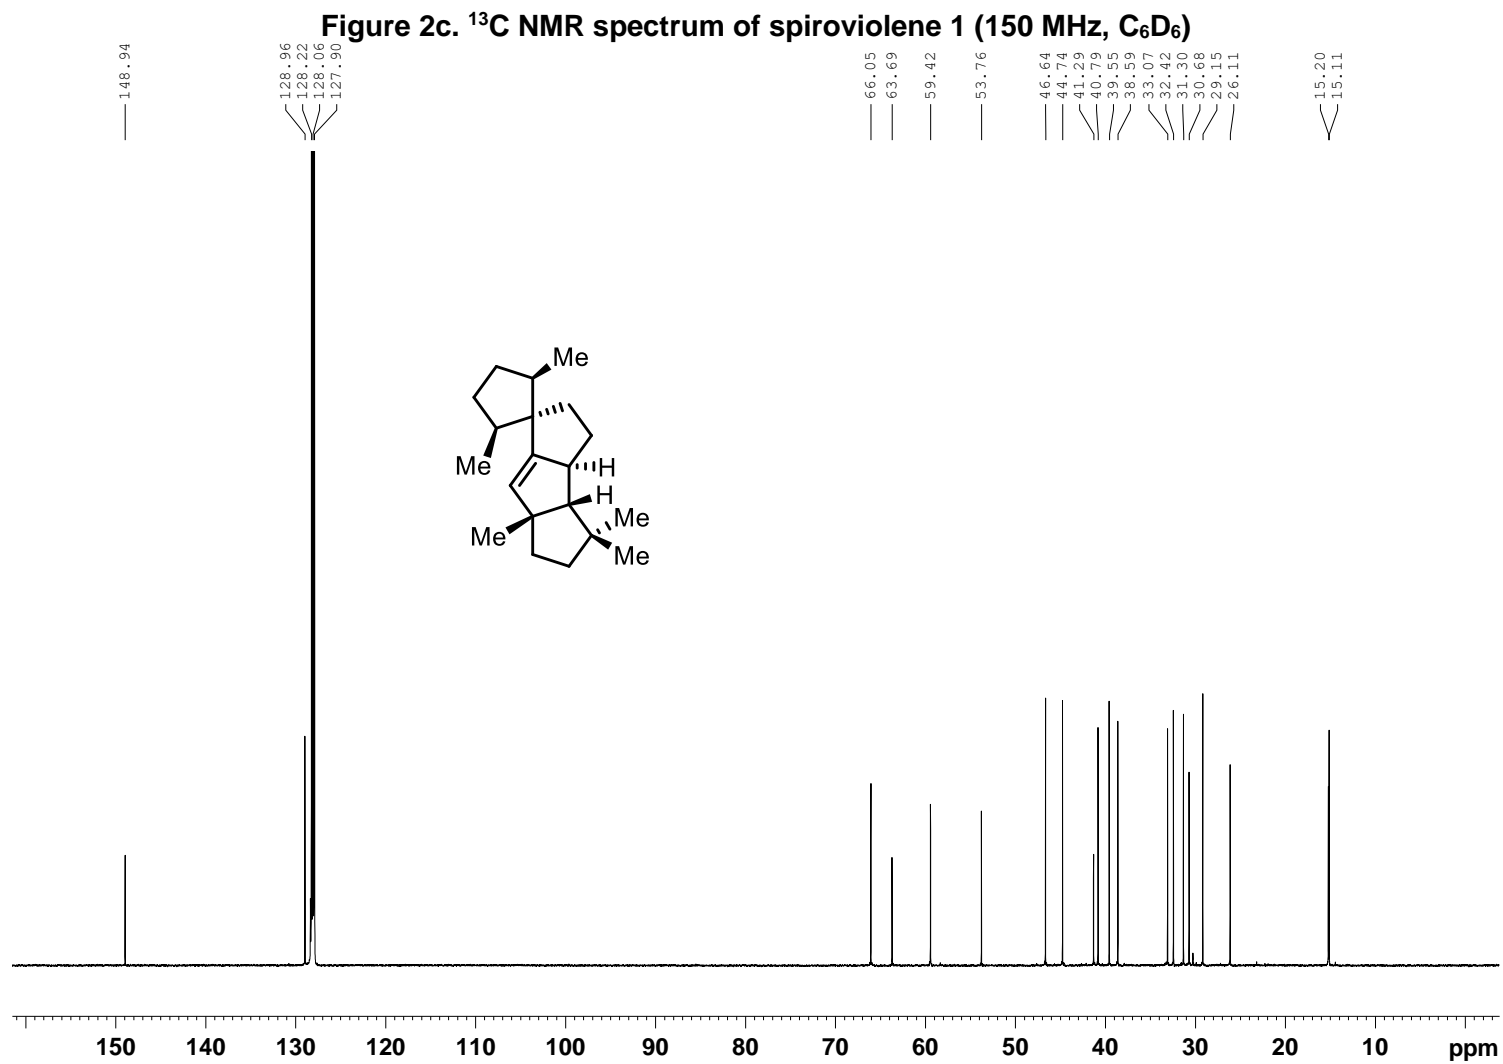

Figure 2d.  $^1\text{H}$ - $^1\text{H}$  COSY spectrum of spiroviolene 1 ( $\text{C}_6\text{D}_6$ )

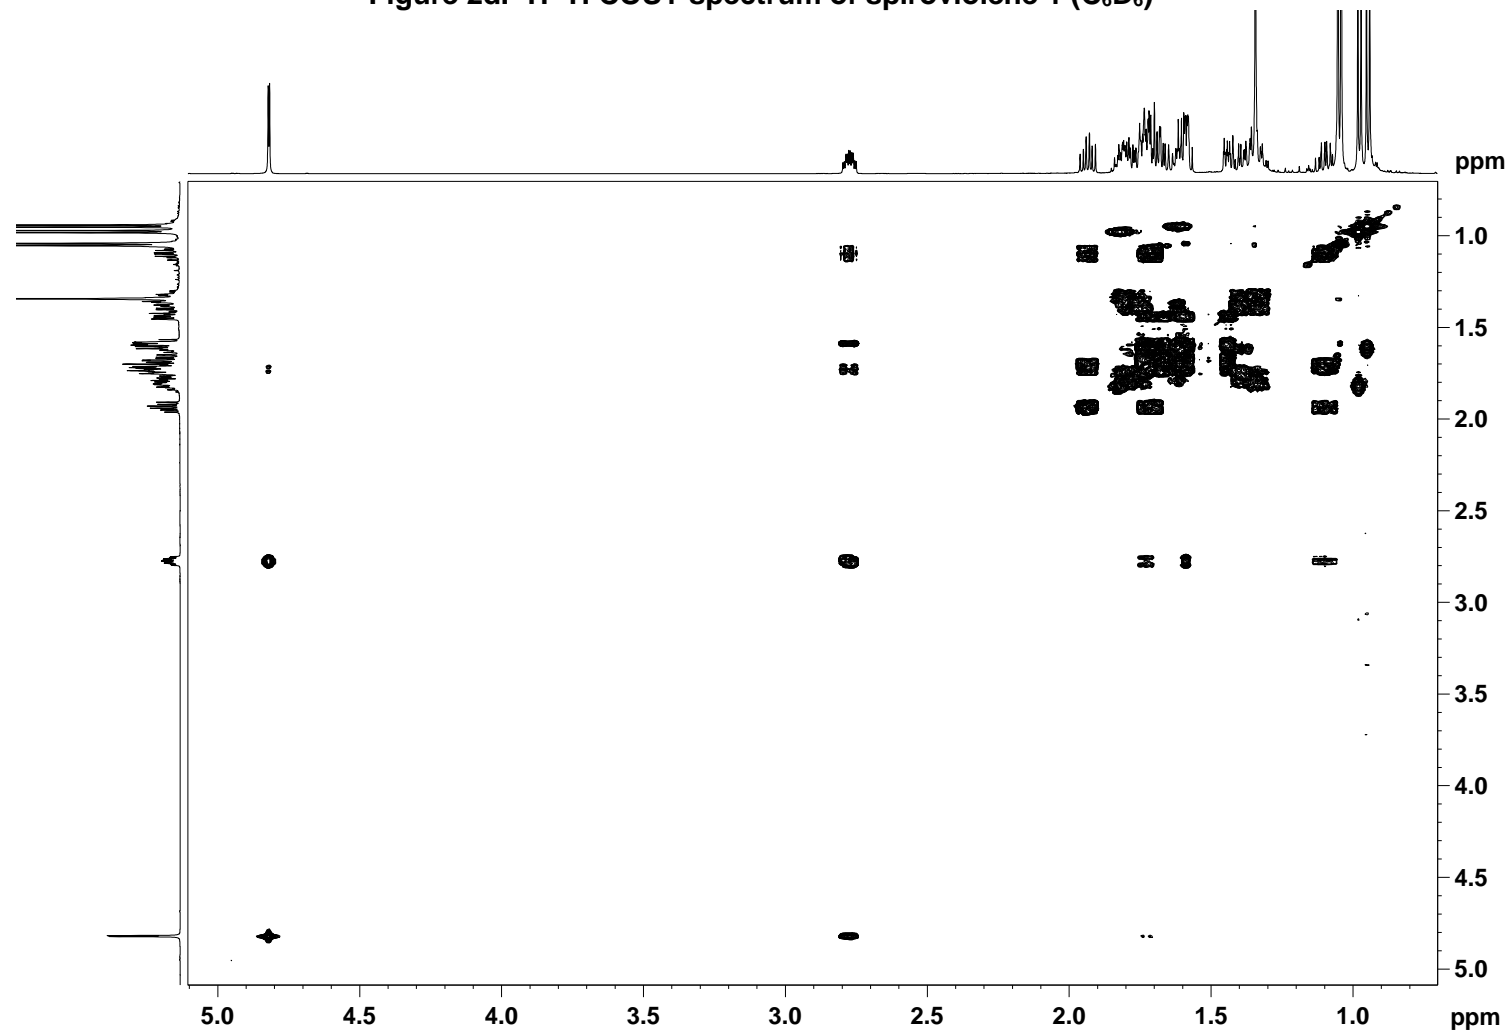

Figure 2e. HSQC spectrum of spiroviolene 1 ( $C_6D_6$ )

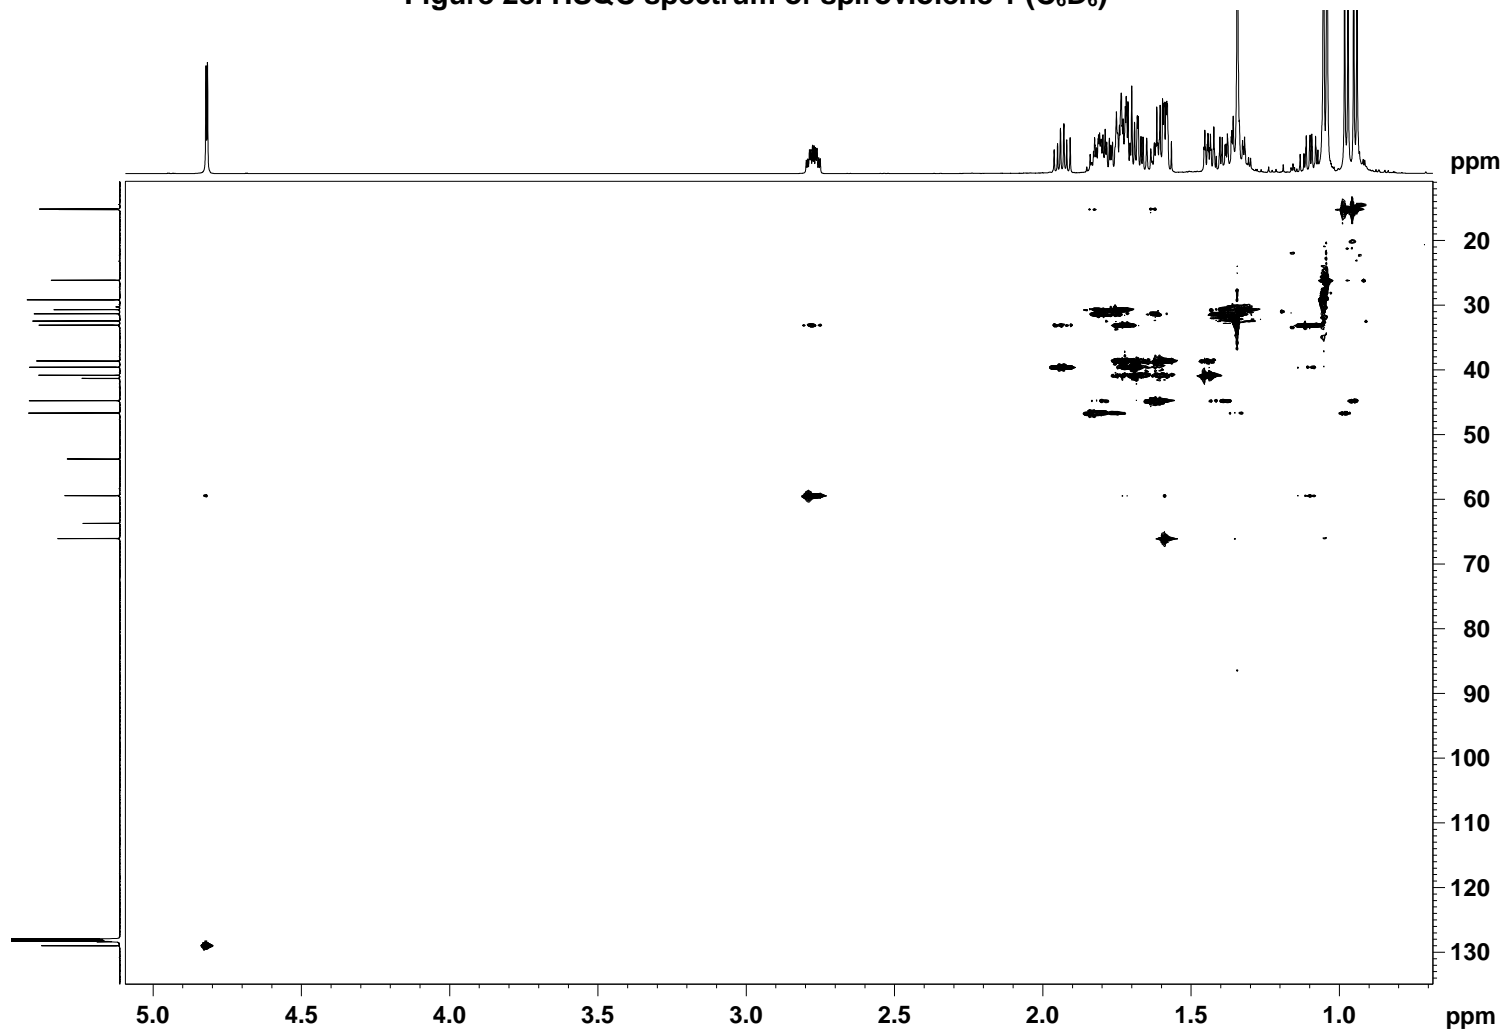



Figure 2f. HMBC spectrum of spiroviolene 1 ( $C_6D_6$ )

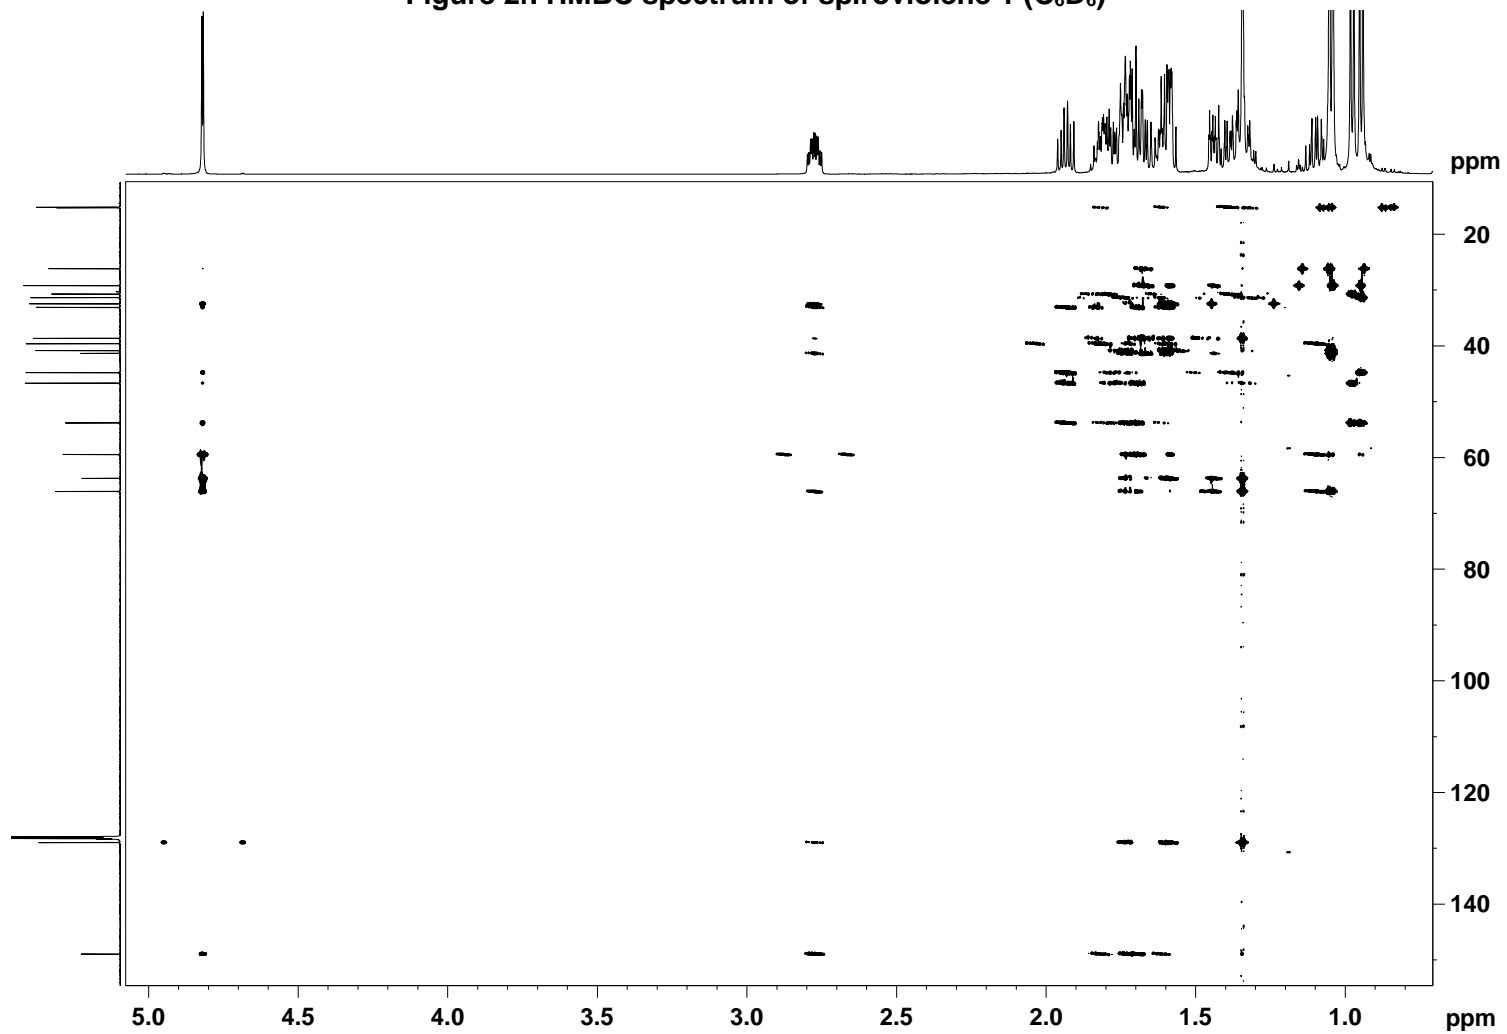

Figure 2g. NOESY spectrum of spiroviolene 1 ( $C_6D_6$ )

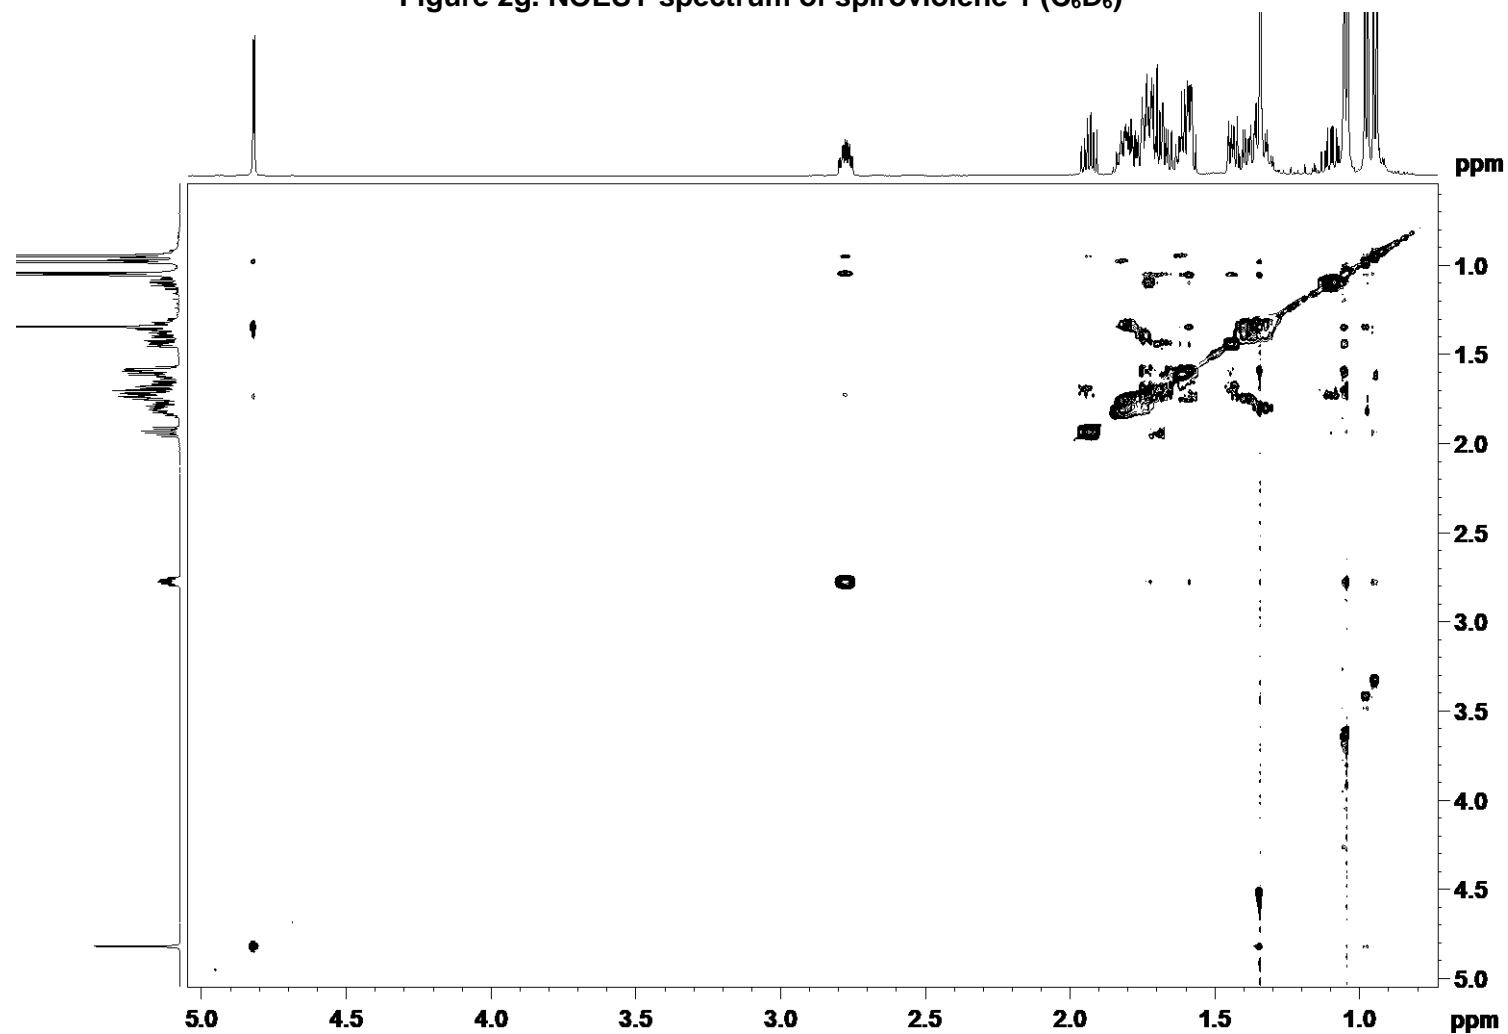

Figure 3a.  $^1\text{H}$  NMR spectrum of spiroviolene 1 (400 MHz,  $\text{CDCl}_3$ )

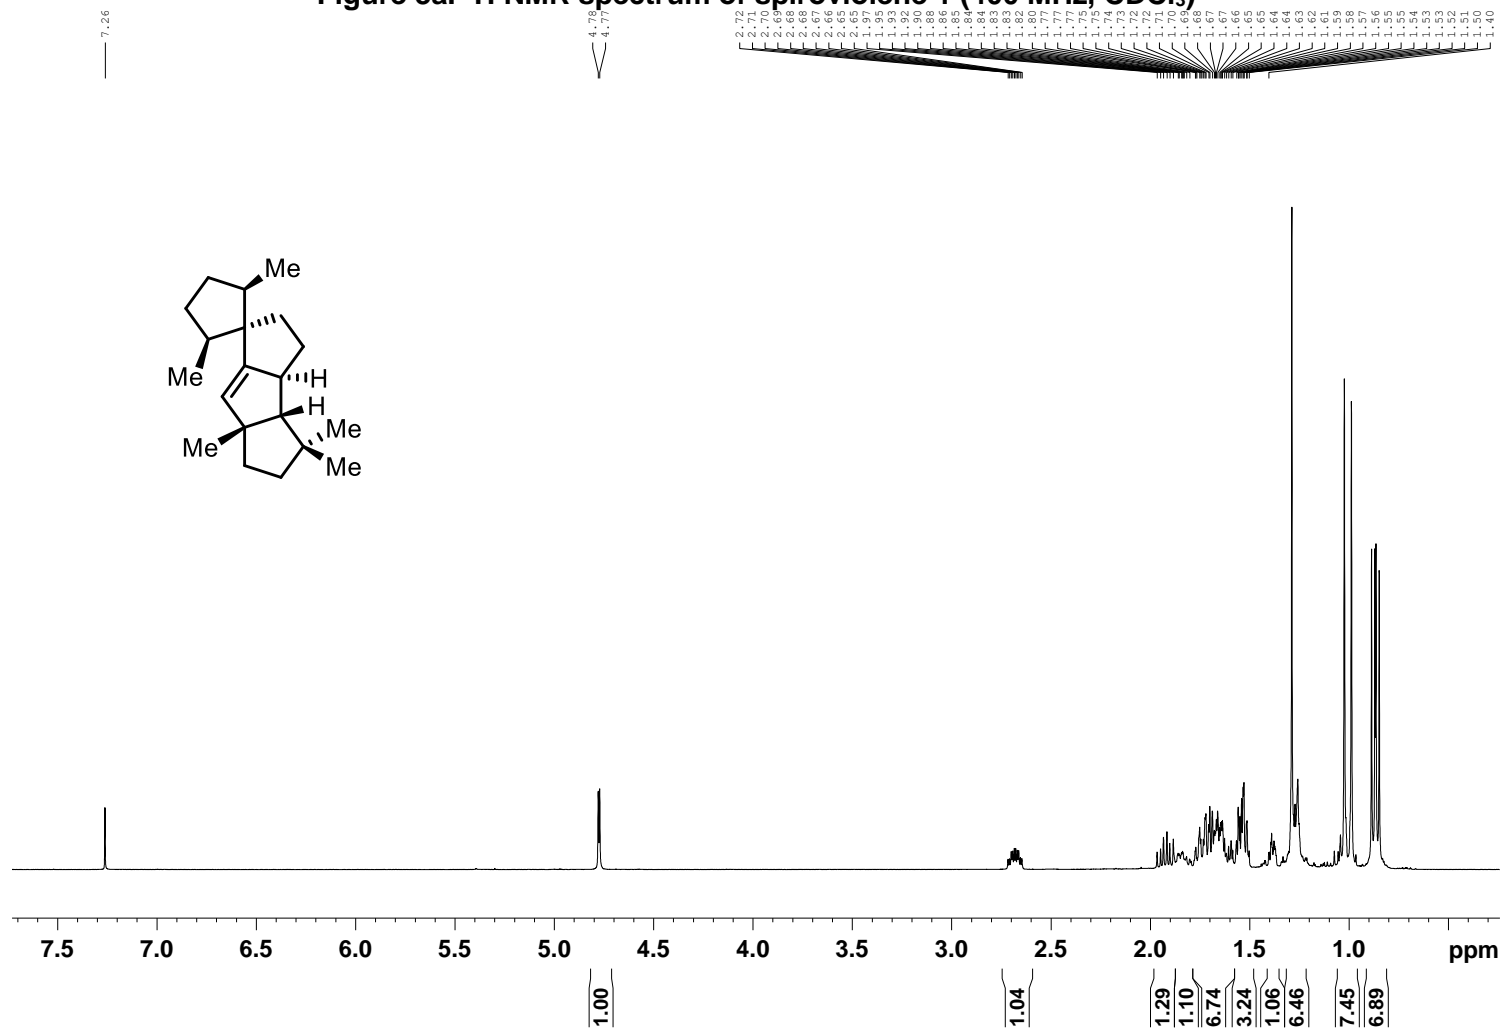

Figure 3b. <sup>1</sup>H NMR spectrum of spiroviolene 1 (400 MHz, CDCl<sub>3</sub>)

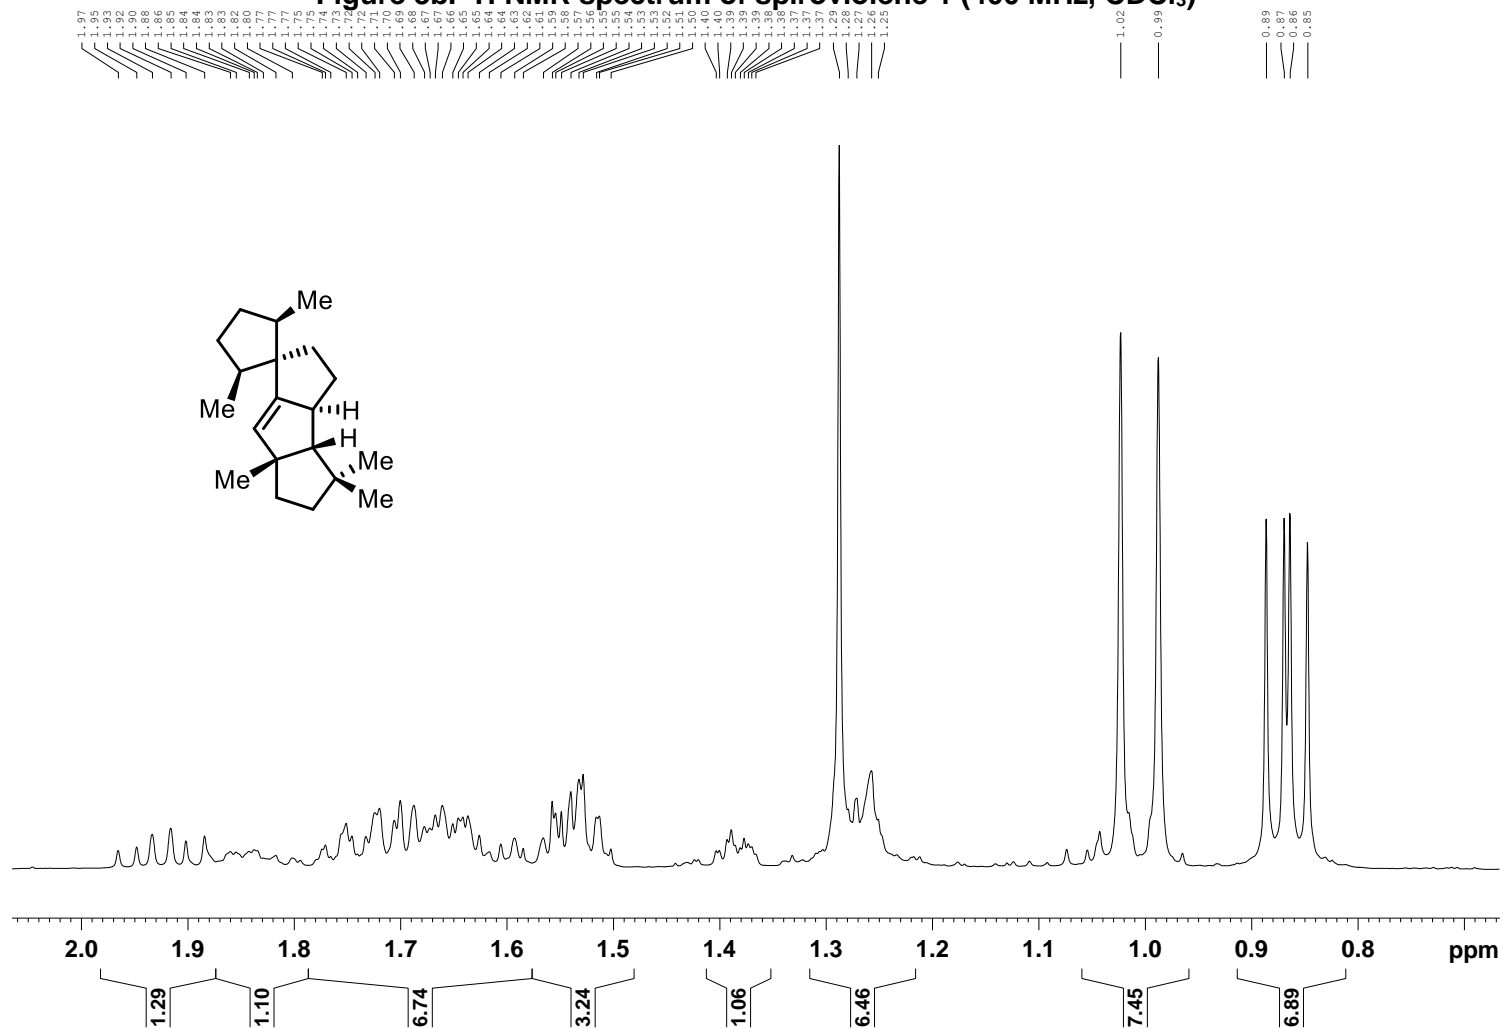

Figure 3c.  $^{13}\text{C}$  NMR spectrum of spiroviolene 1 (100 MHz,  $\text{CDCl}_3$ )

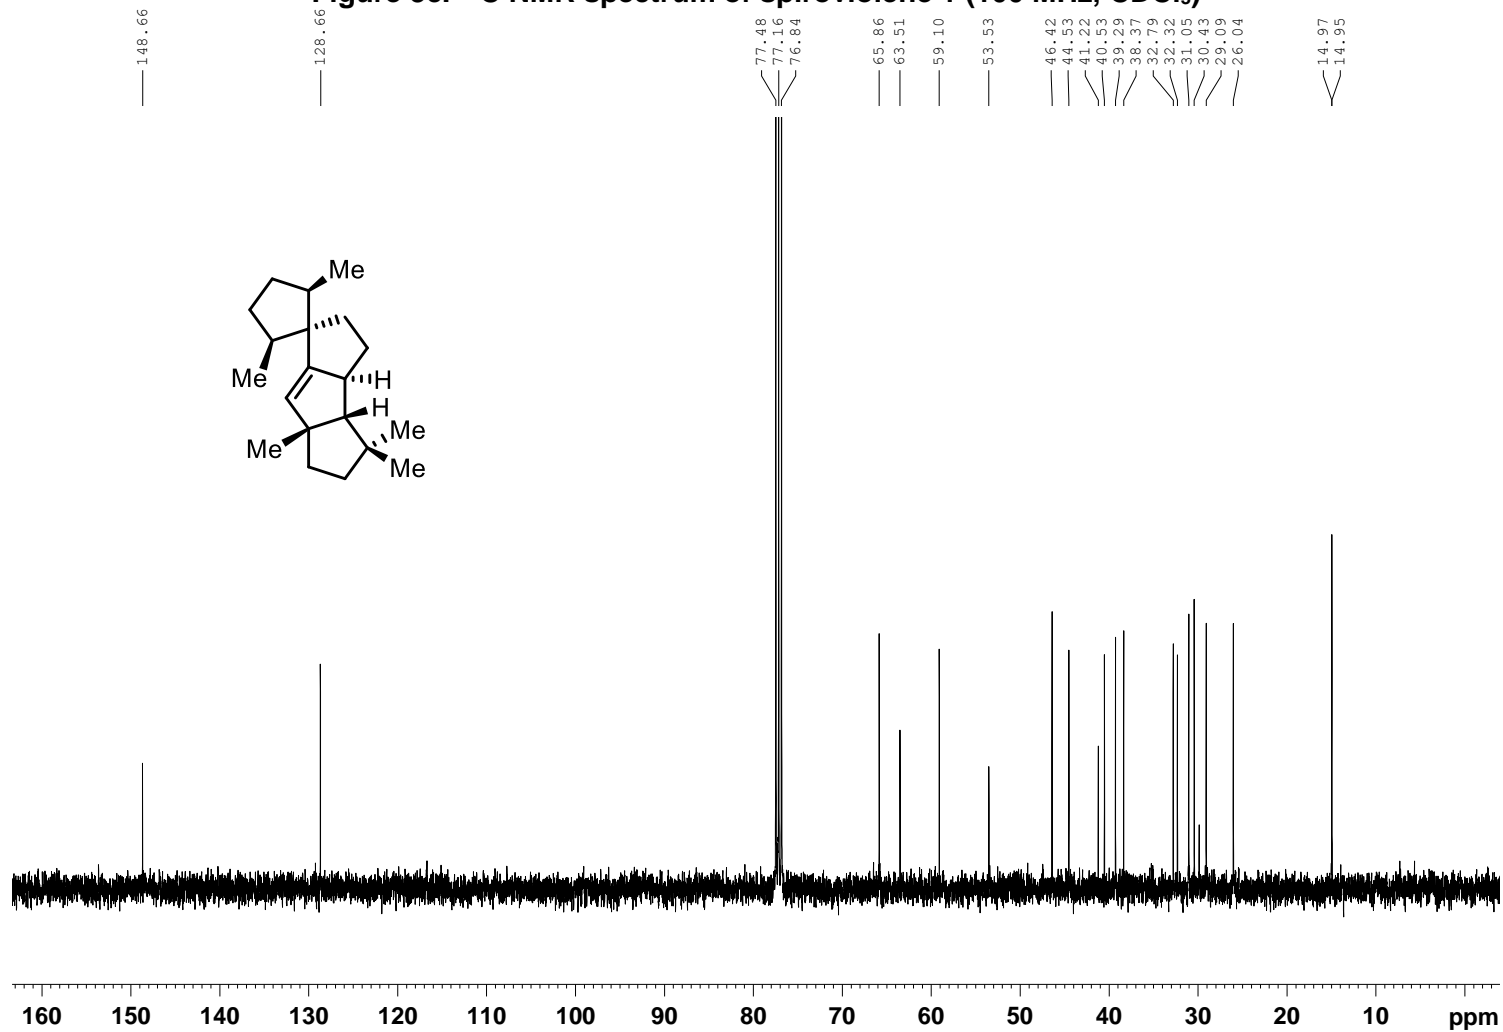

Figure 3d.  $^1\text{H}$ - $^1\text{H}$  COSY spectrum of spiroviolene 1 ( $\text{CDCl}_3$ )

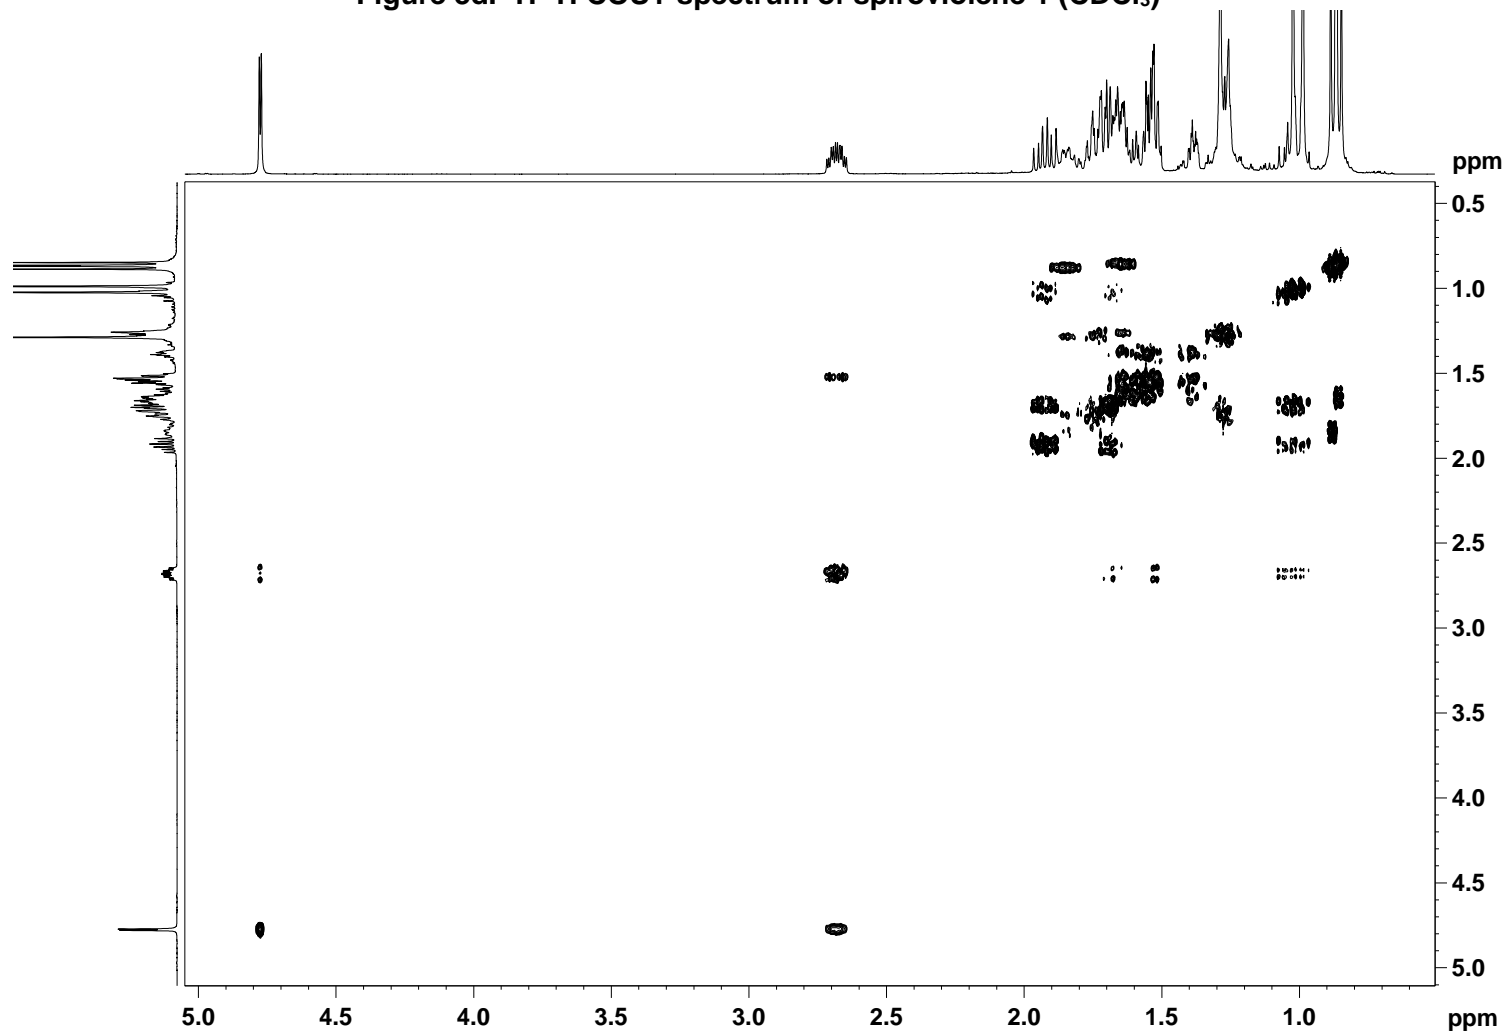

Figure 3e. HSQC spectrum of spiroviolene 1 (CDCl<sub>3</sub>)

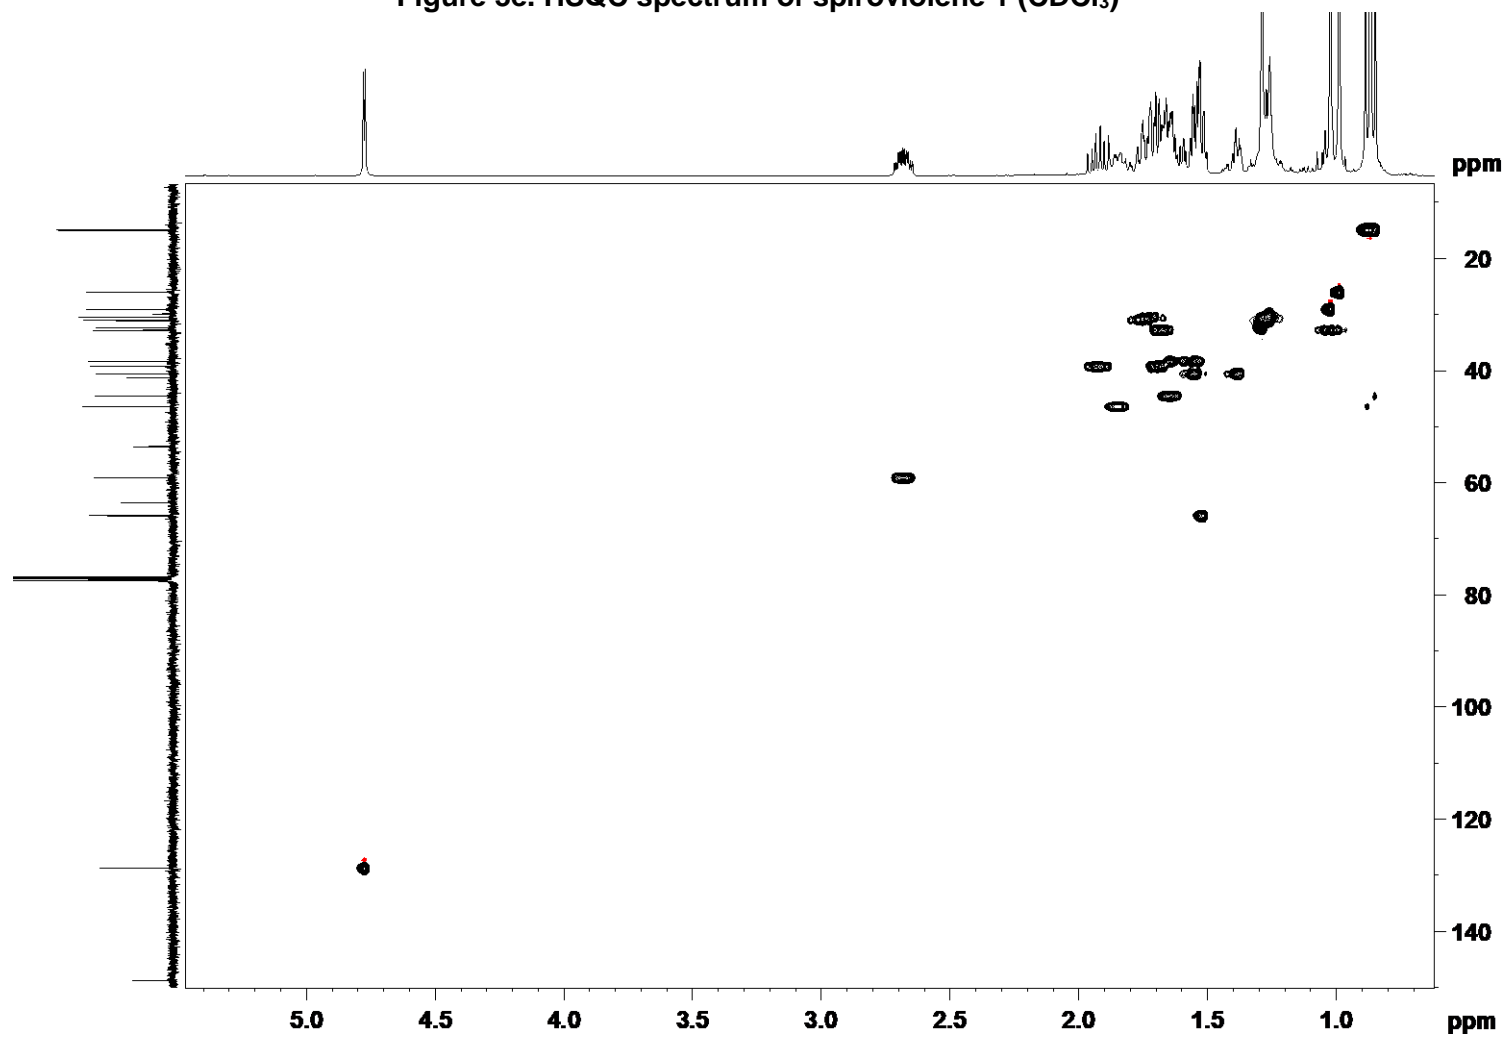

Figure 3f. HMBC spectrum of spiroviolene 1 (CDCl<sub>3</sub>)

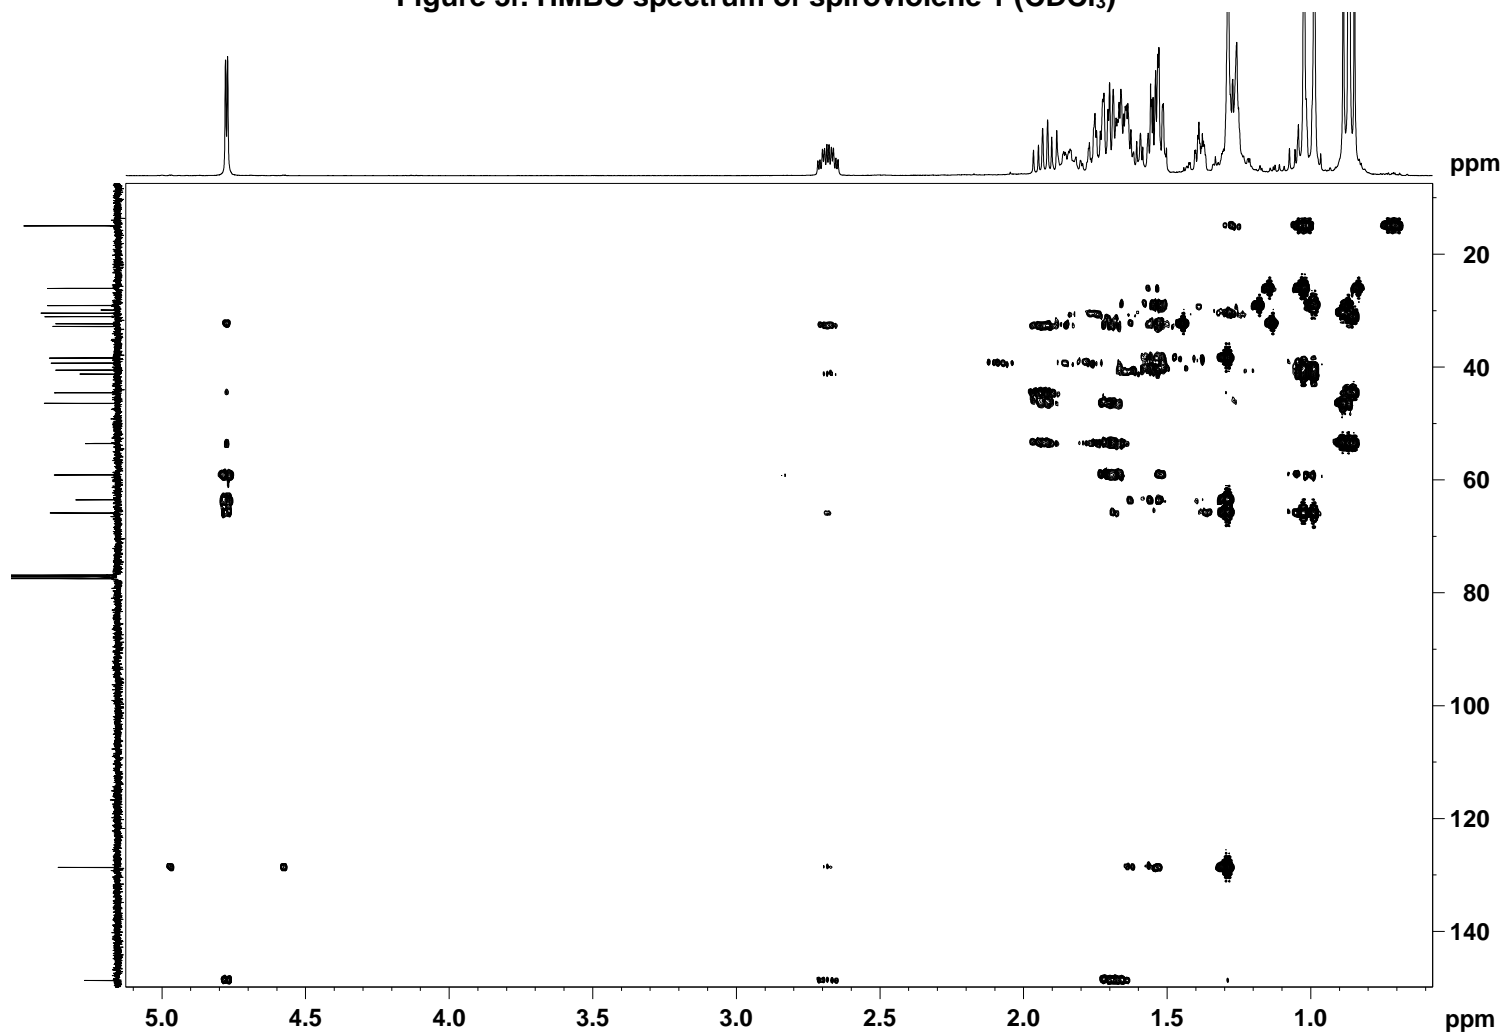





Figure 4a. <sup>1</sup>H NMR spectrum of 1 $\alpha$ -hydroxy-spiroviolane 9 (600 MHz, CDCl<sub>3</sub>)

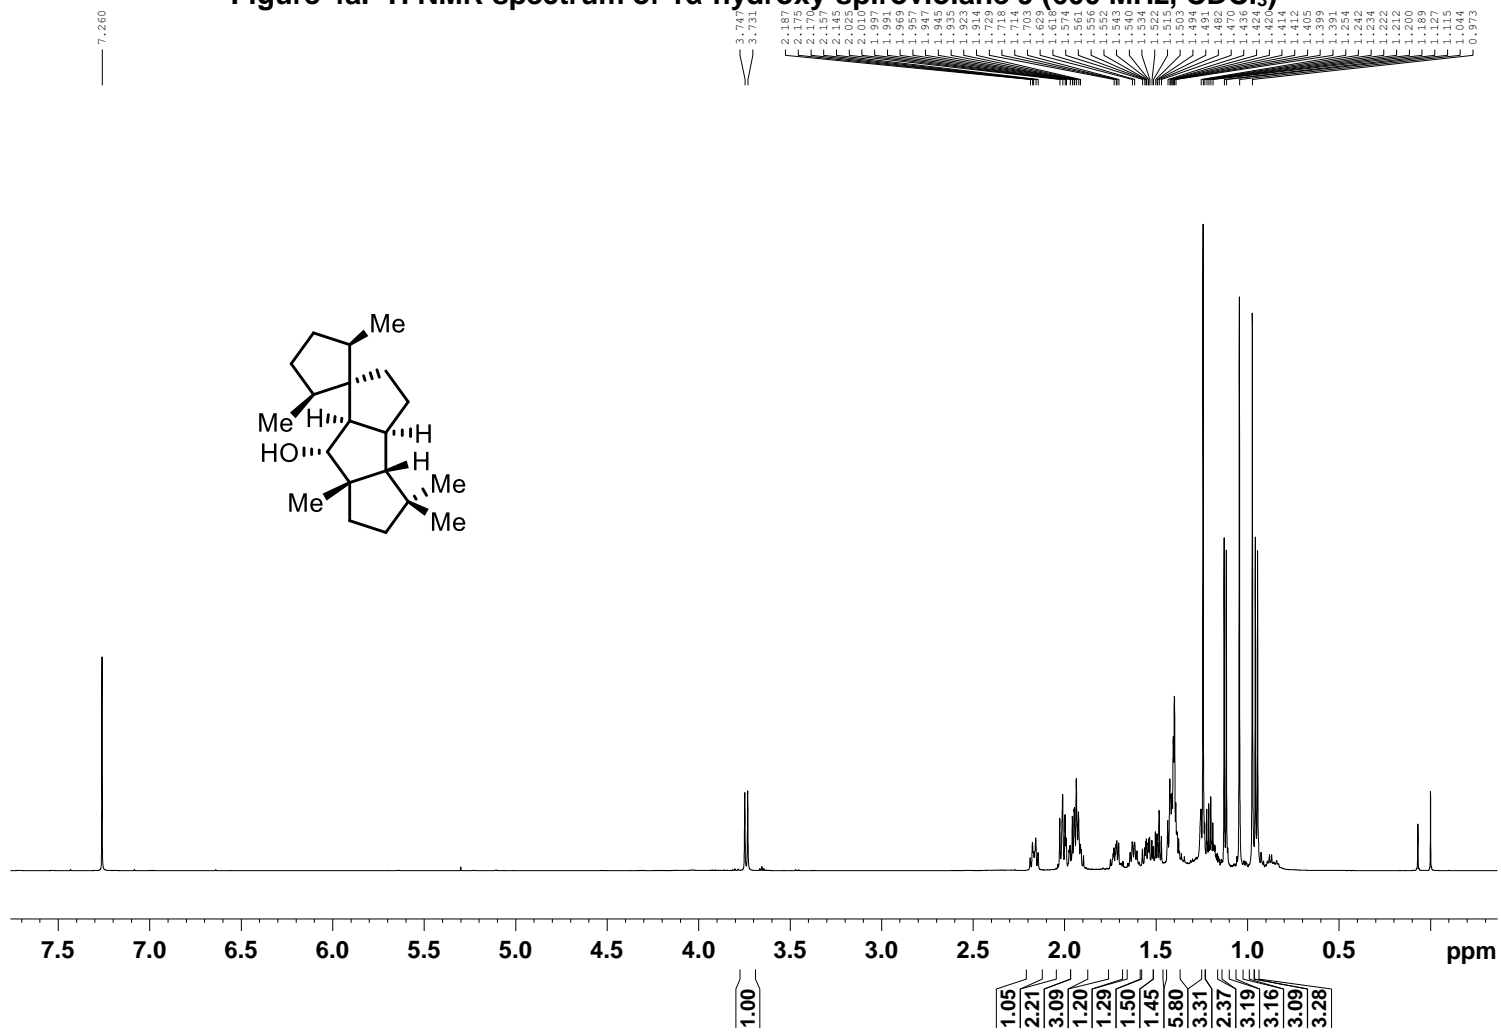

Figure 4b. <sup>1</sup>H NMR spectrum of 1 $\alpha$ -hydroxy-spiroviolane 9 (600 MHz, CDCl<sub>3</sub>)

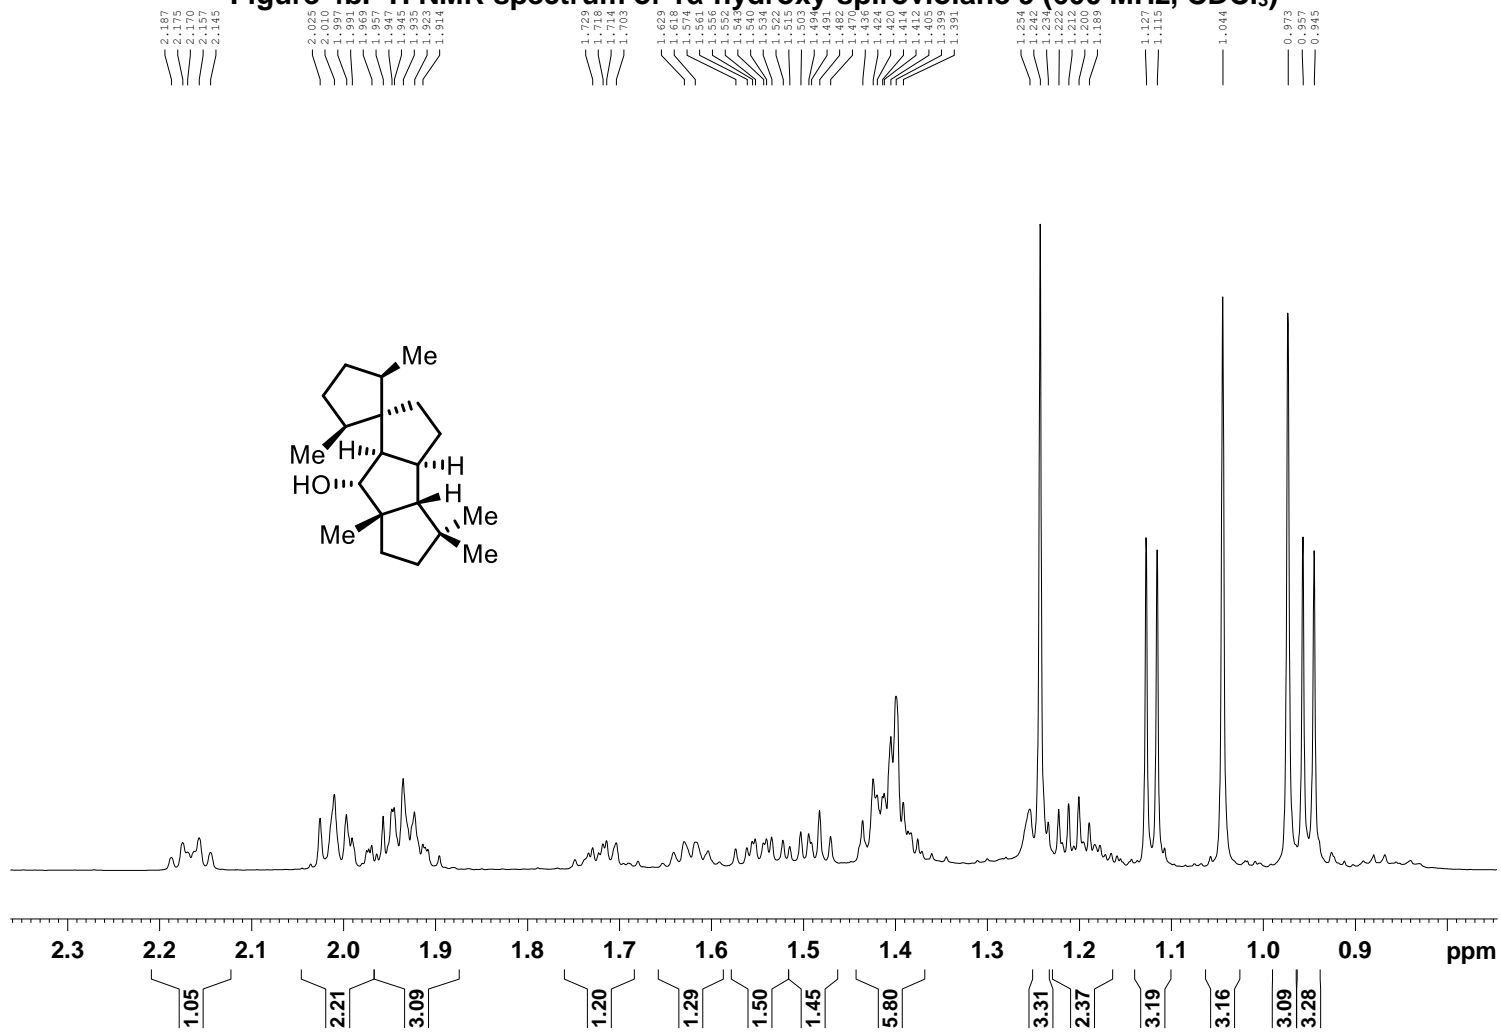

2.187  
2.170  
2.157  
2.145

2.025  
2.010  
1.991  
1.969  
1.957  
1.947  
1.935  
1.923  
1.914

1.729  
1.718  
1.703

1.629  
1.574  
1.561  
1.556  
1.522  
1.520  
1.510  
1.500  
1.494  
1.491  
1.482  
1.476  
1.470  
1.464  
1.420  
1.414  
1.405  
1.399  
1.391

1.254  
1.242  
1.234  
1.212  
1.200  
1.189

1.127  
1.115

1.044

0.973  
0.957  
0.945

2.3 2.2 2.1 2.0 1.9 1.8 1.7 1.6 1.5 1.4 1.3 1.2 1.1 1.0 0.9 ppm

1.05 2.21 3.09 1.20 1.29 1.50 1.45 5.80 3.31 2.37 3.19 3.16 3.09 3.28

Figure 4c.  $^{13}\text{C}$  NMR spectrum of 1 $\alpha$ -hydroxy-spiroviolane 9 (150 MHz,  $\text{CDCl}_3$ )

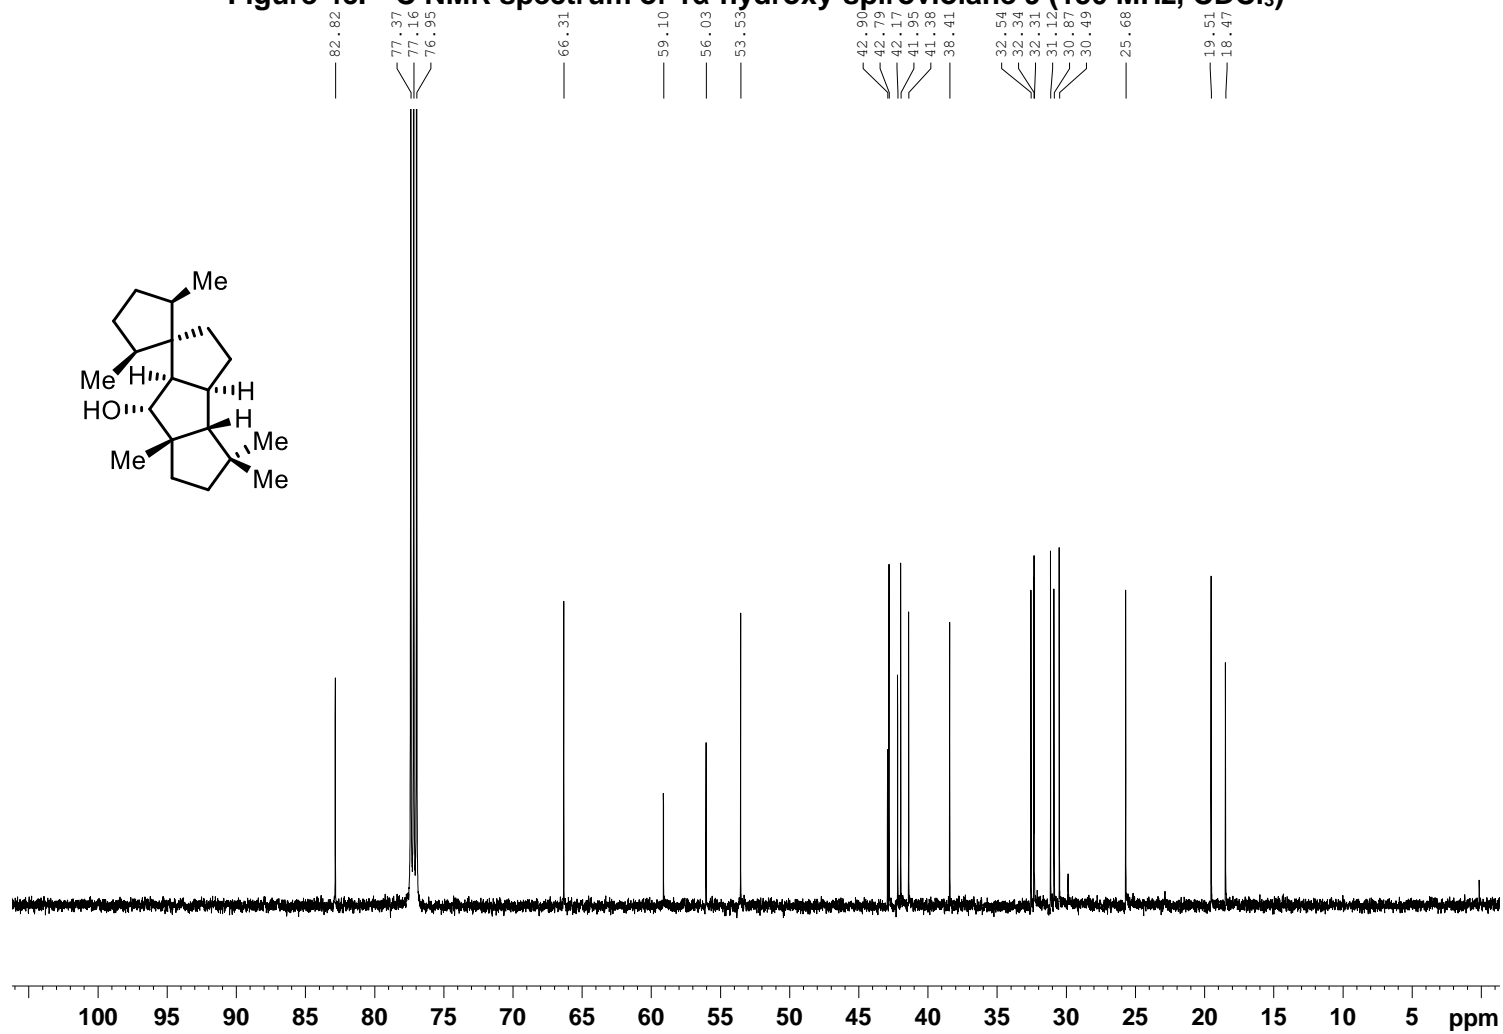

Figure 4d.  $^1\text{H}$ - $^1\text{H}$  COSY spectrum of 1 $\alpha$ -hydroxy-spiroviolane 9 ( $\text{CDCl}_3$ )

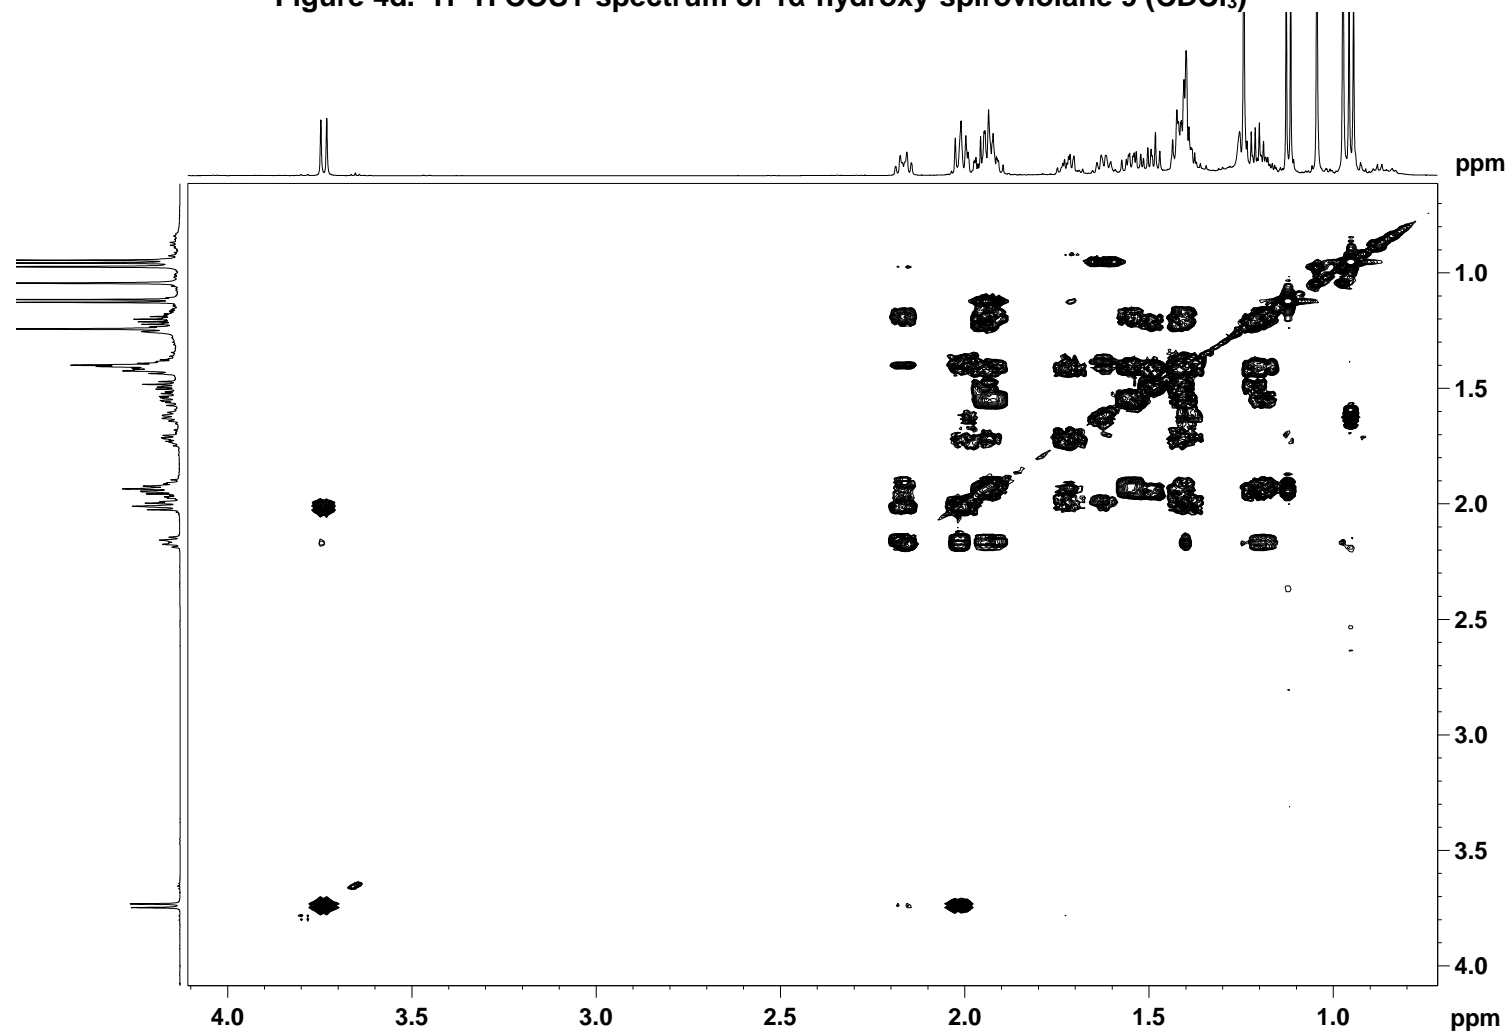

Figure 4e. HSQC spectrum of 1 $\alpha$ -hydroxy-spiroviolane 9 (CDCl<sub>3</sub>)

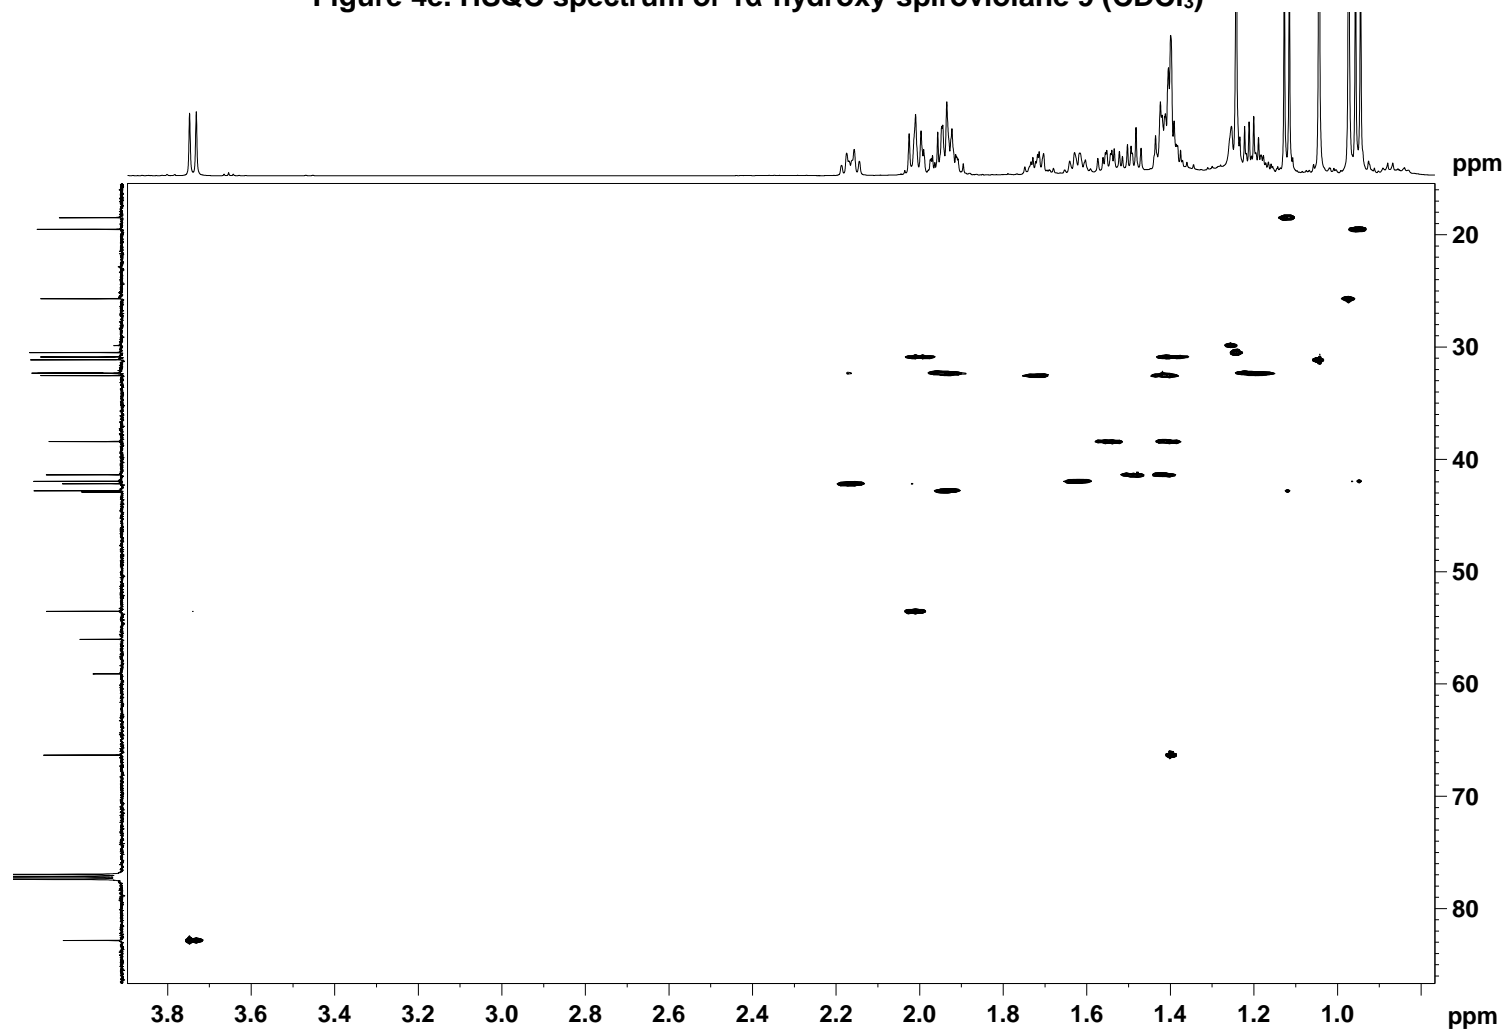

Figure 4f. HMBC spectrum of 1 $\alpha$ -hydroxy-spiroviolane 9 (CDCl<sub>3</sub>)

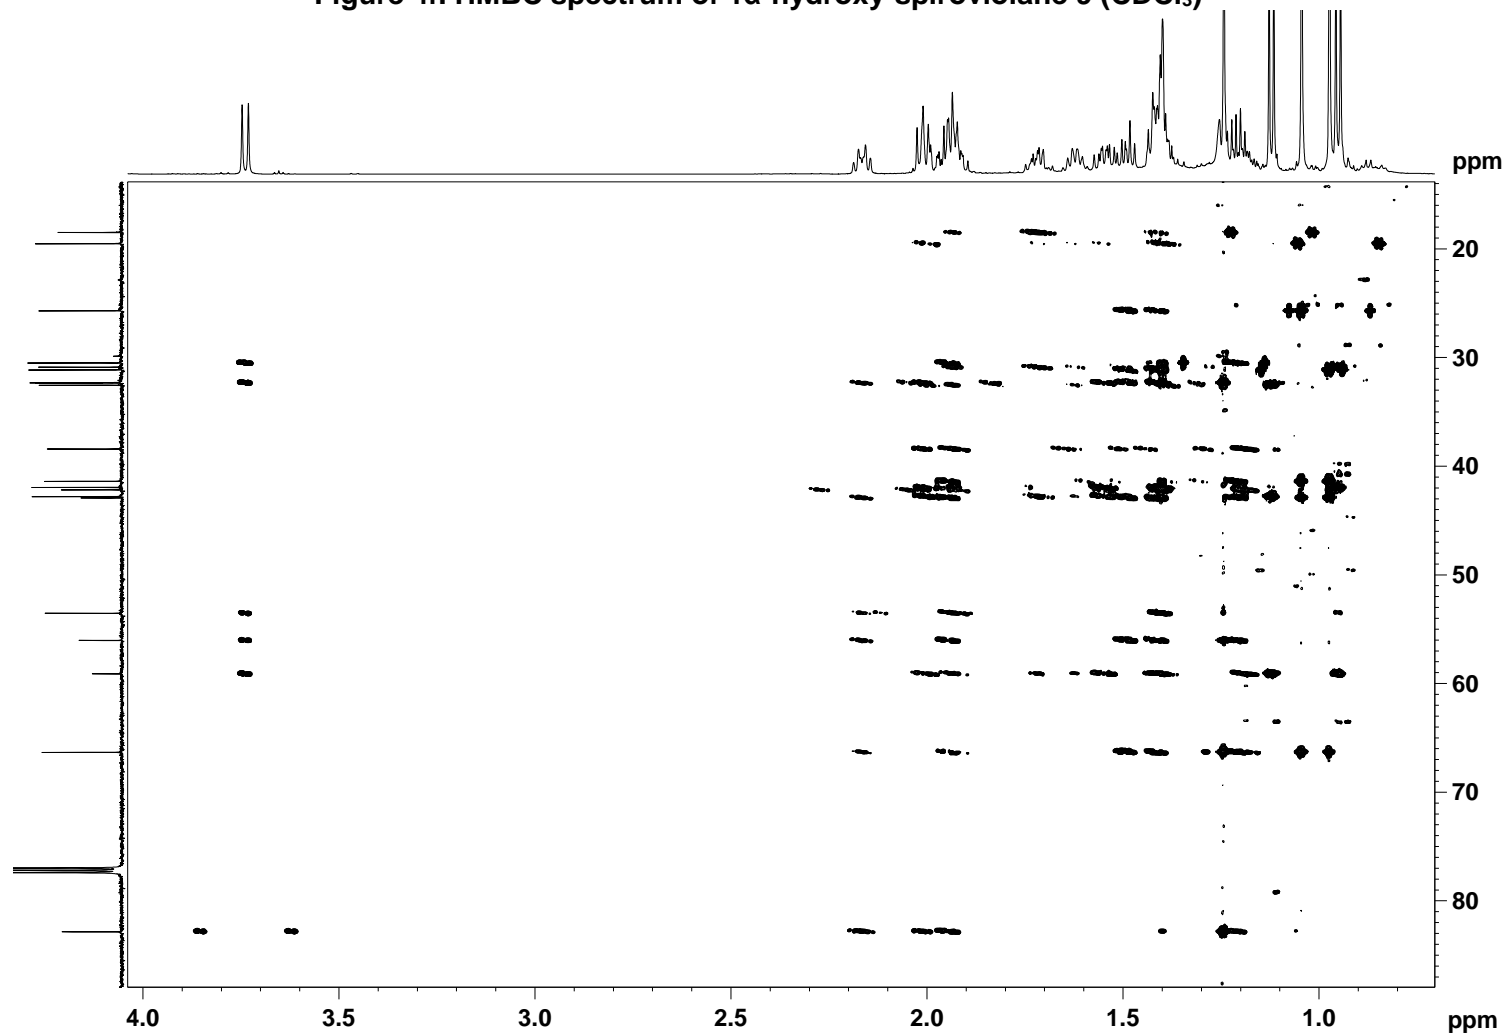

Figure 4g. NOESY spectrum of 1 $\alpha$ -hydroxy-spiroviolane 9 (CDCl<sub>3</sub>)

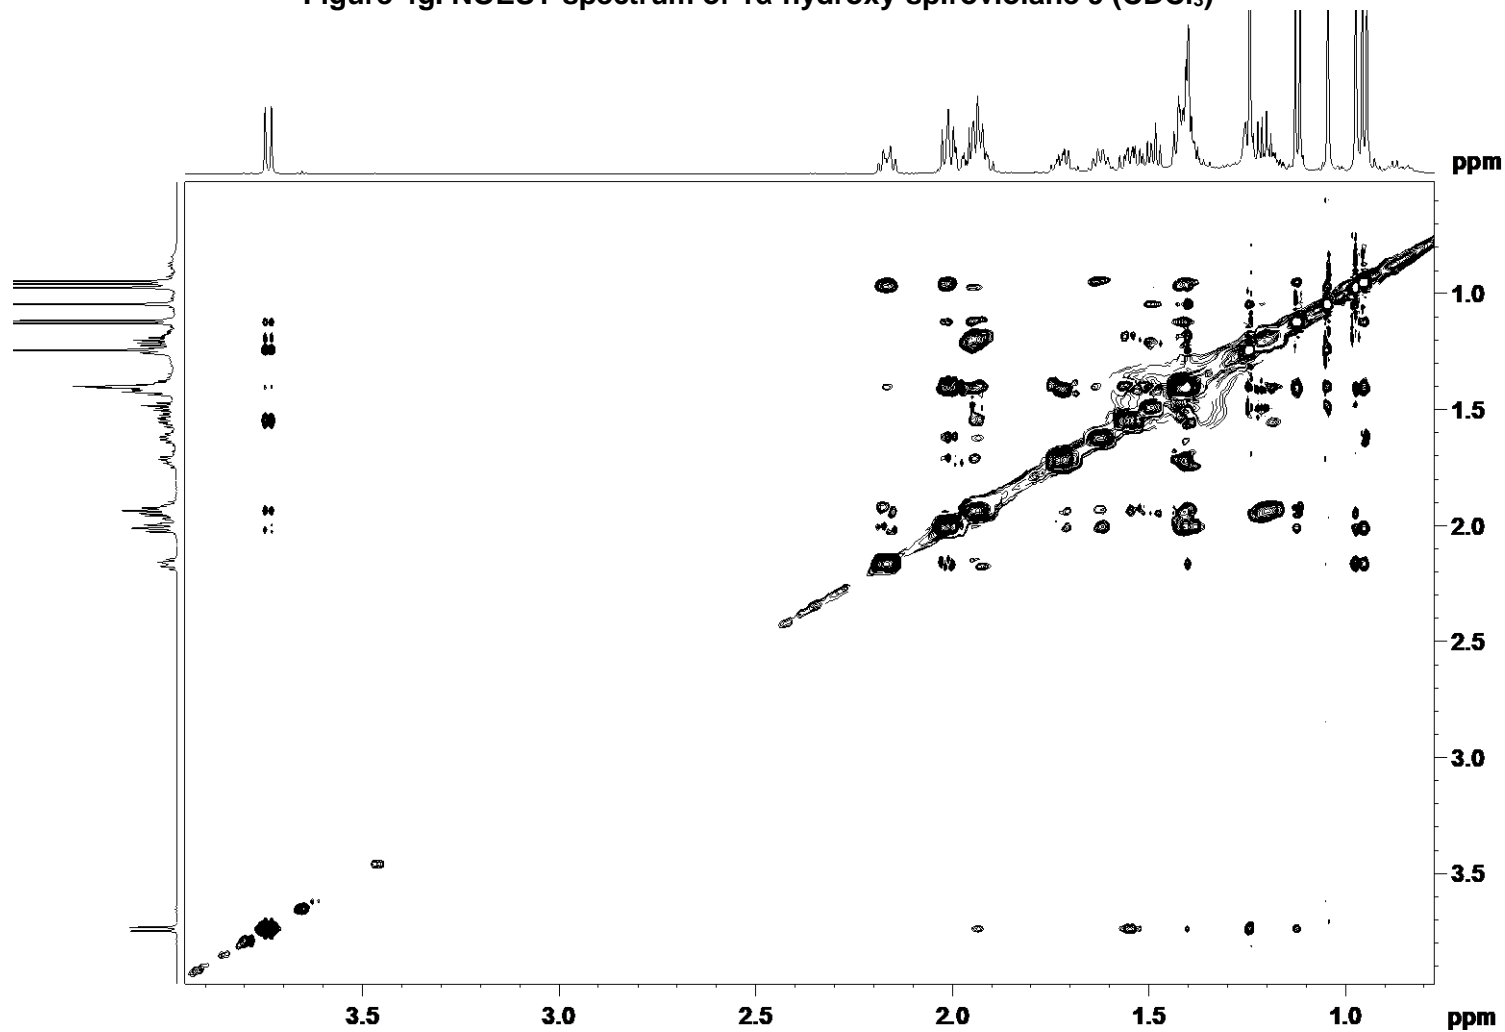



Figure 5a. <sup>1</sup>H NMR spectrum of compound 9β-hydroxy-spiroviolane 11 (600 MHz, CDCl<sub>3</sub>)

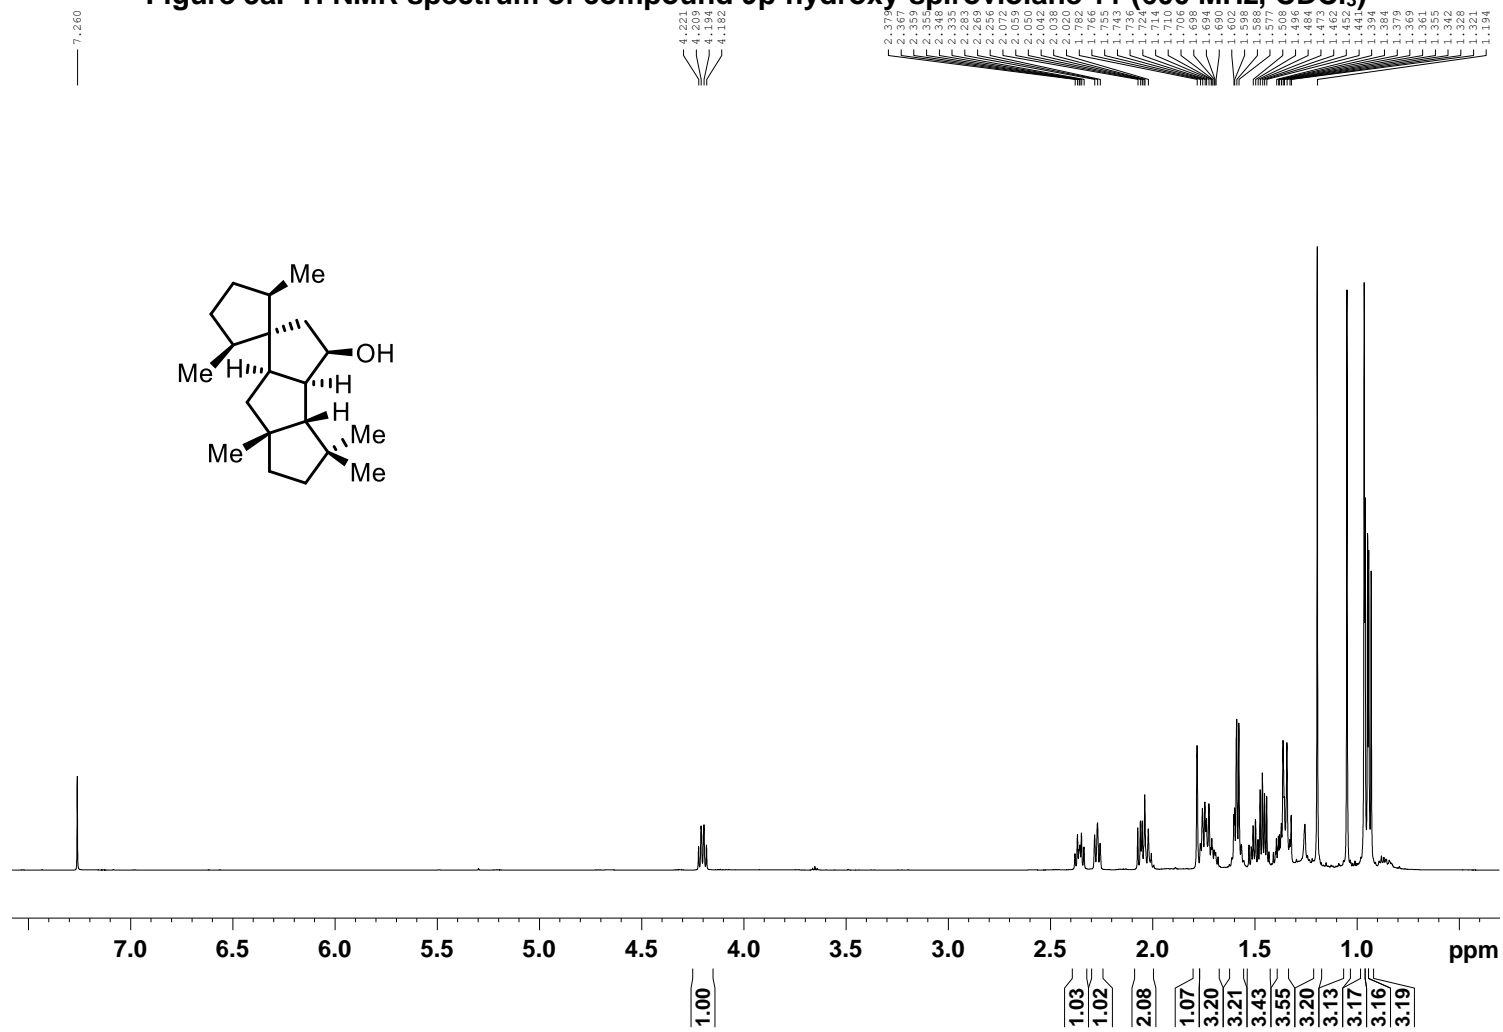

Figure 5b. <sup>1</sup>H NMR spectrum of 9β-hydroxy-spiroviolane 11 (600 MHz, CDCl<sub>3</sub>)

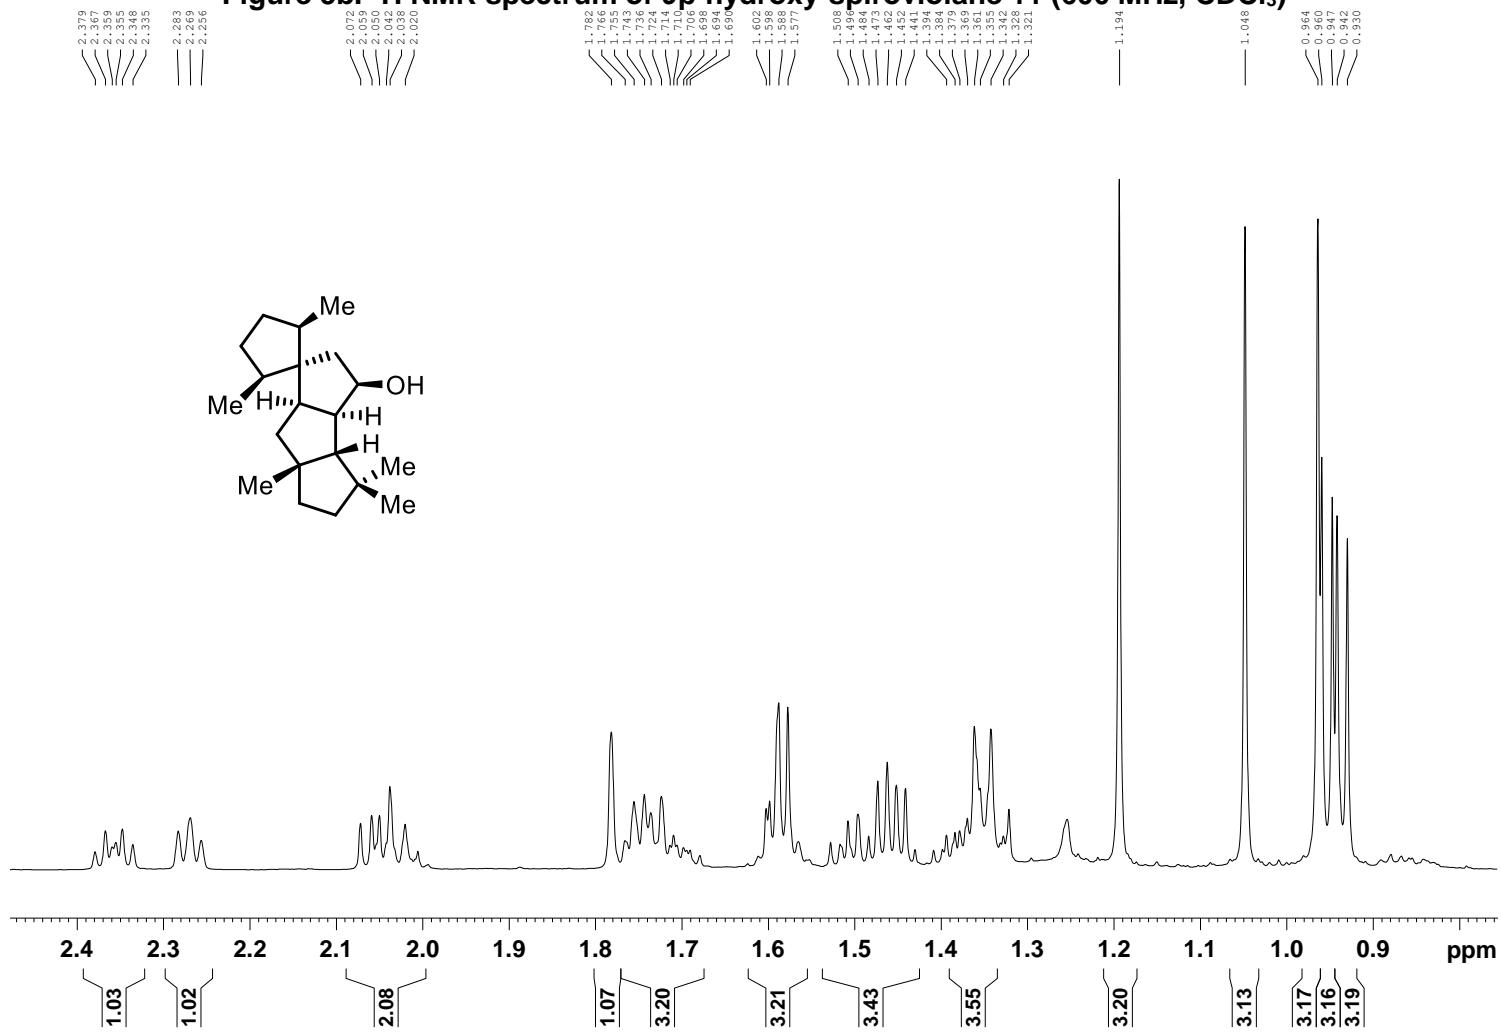

Figure 5c.  $^{13}\text{C}$  NMR spectrum of 9 $\beta$ -hydroxy-spiroviolane 11 (150 MHz,  $\text{CDCl}_3$ )

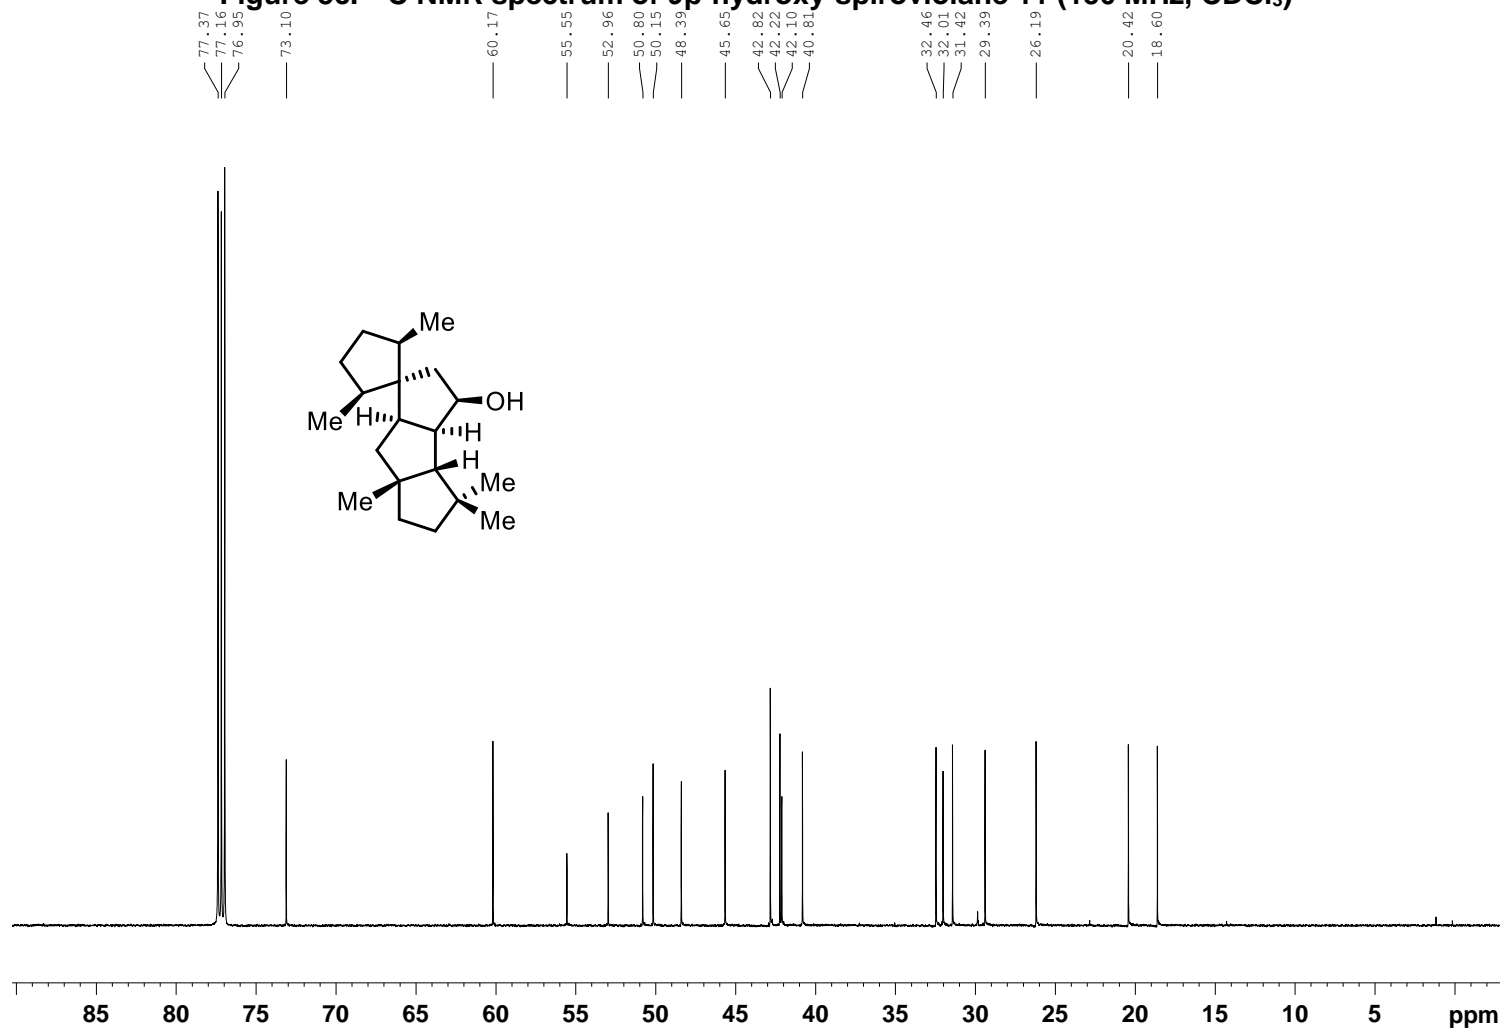

Figure 5d.  $^1\text{H}$ - $^1\text{H}$  COSY spectrum of  $9\beta$ -hydroxy-spiroviolane 11 ( $\text{CDCl}_3$ )

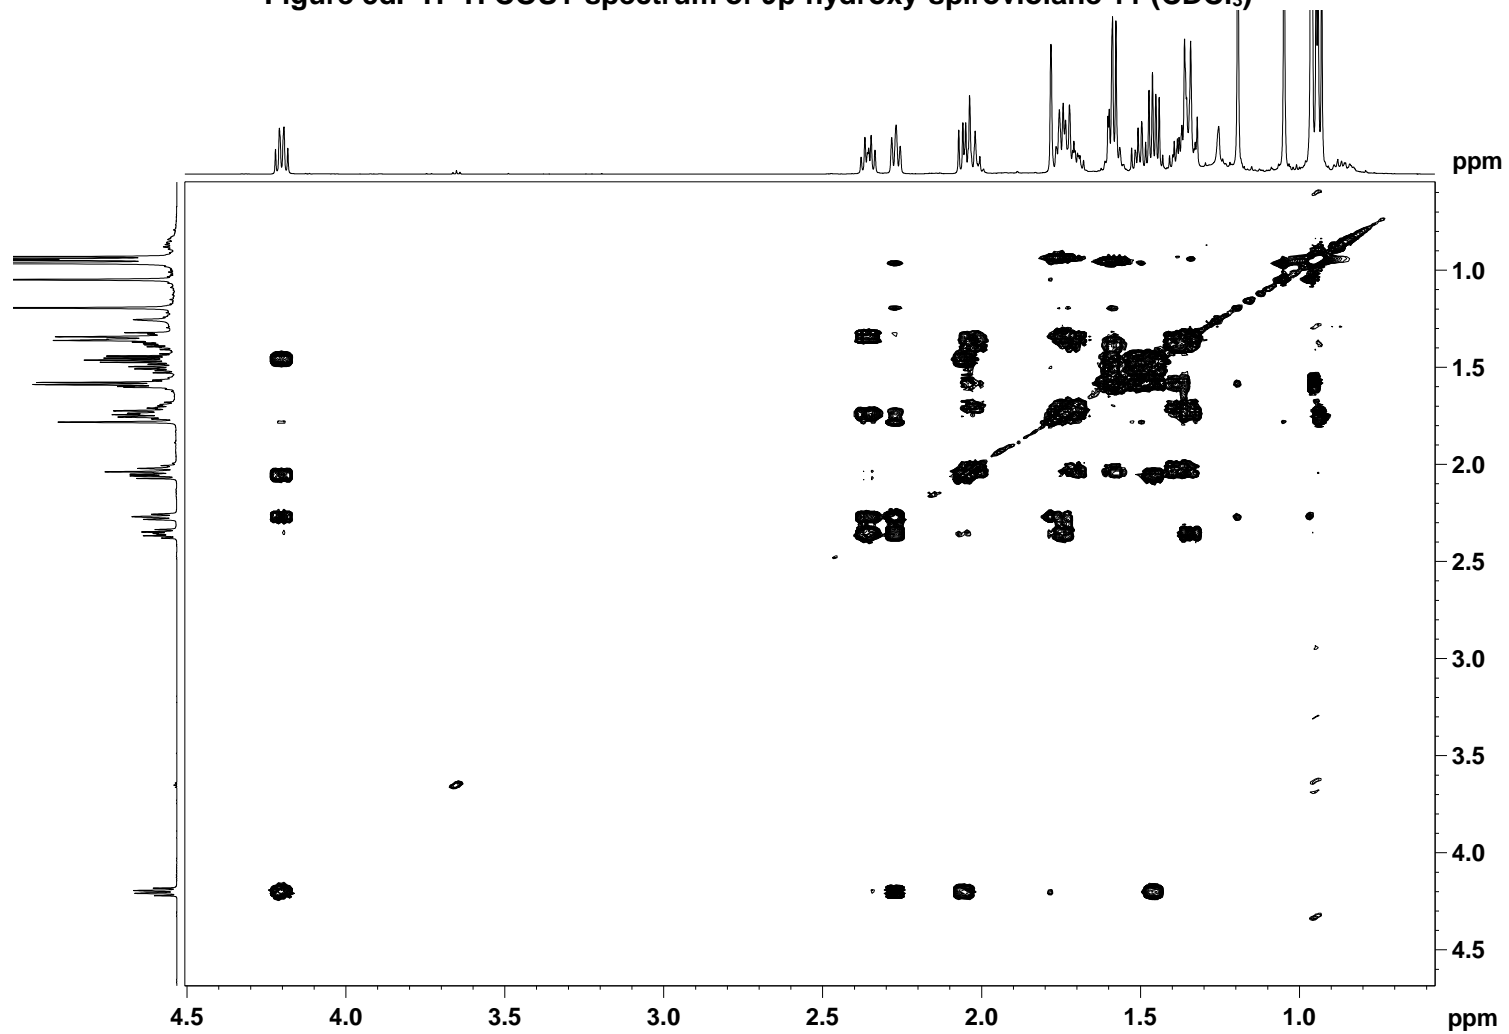

Figure 5e. HSQC spectrum of 9 $\beta$ -hydroxy-spiroviolane 11 (CDCl<sub>3</sub>)

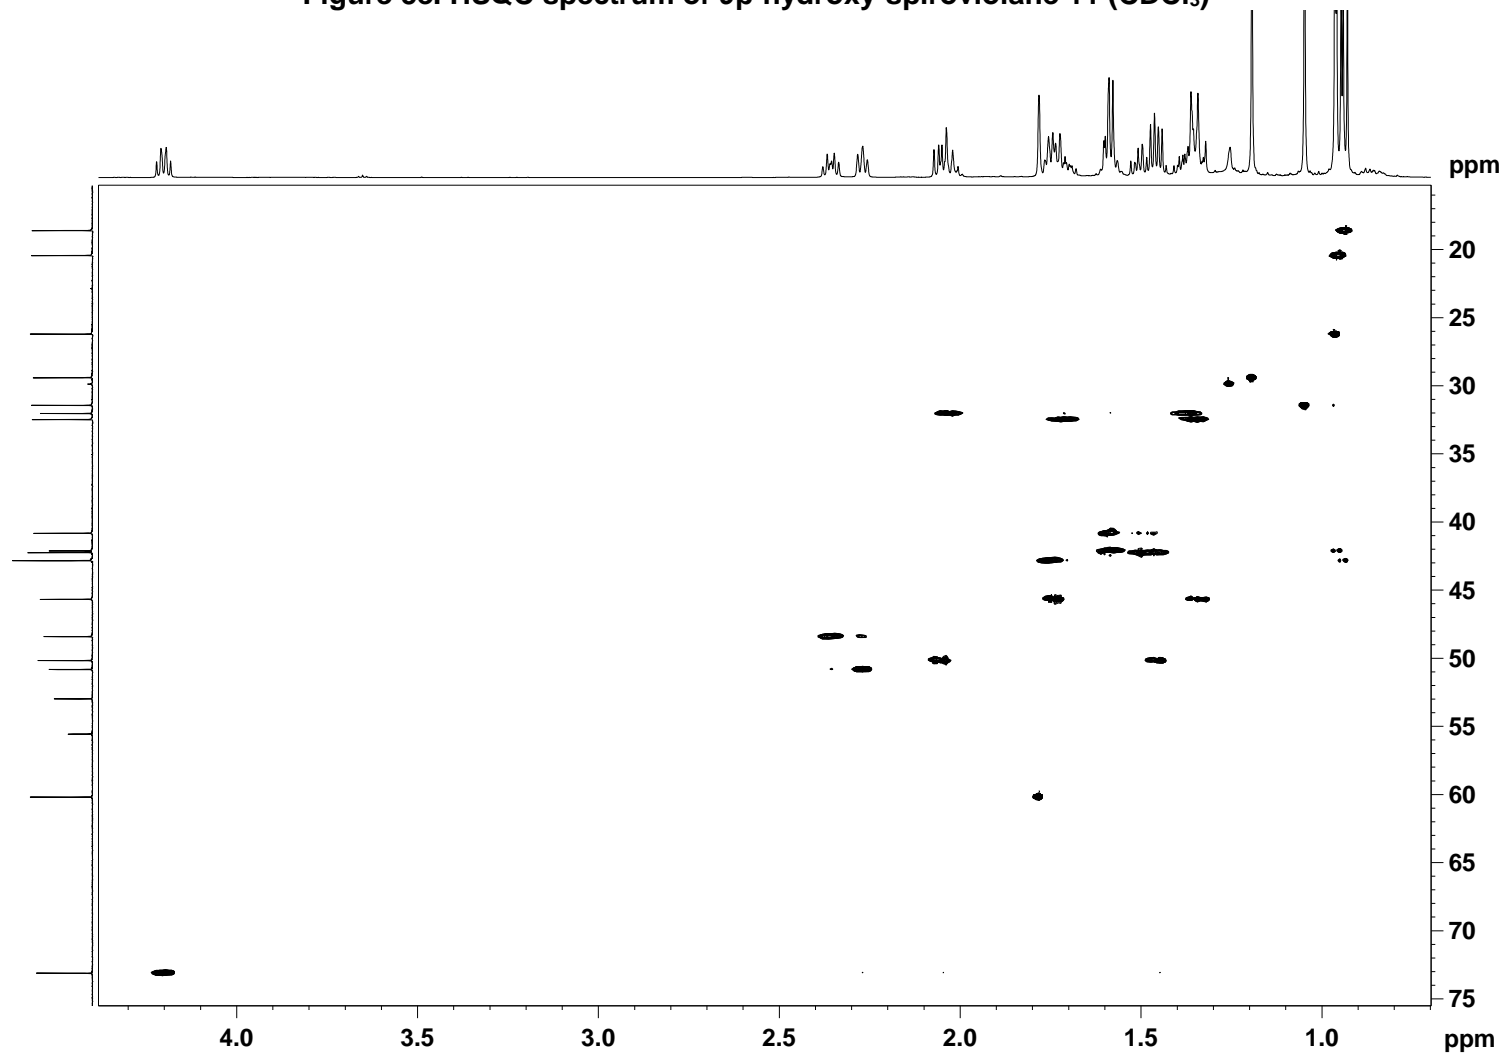

Figure 5f. HMBC spectrum of 9 $\beta$ -hydroxy-spiroviolane 11 (CDCl<sub>3</sub>)

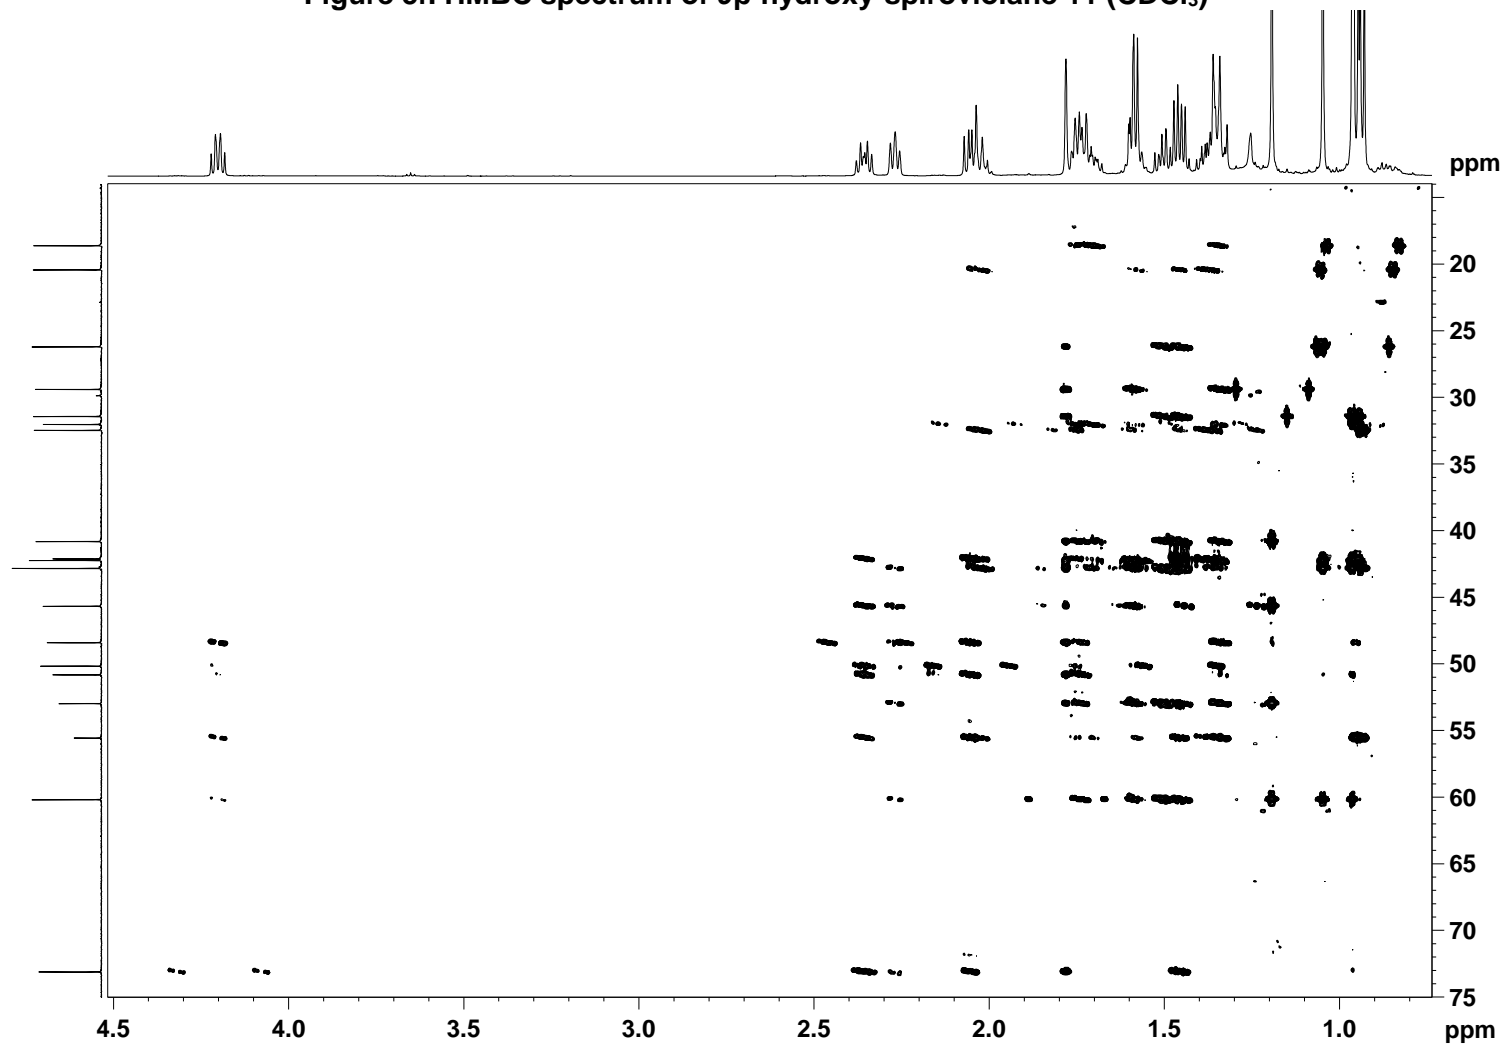

Figure 5g. NOESY spectrum of 9 $\beta$ -hydroxy-spiroviolane 11 (CDCl<sub>3</sub>)

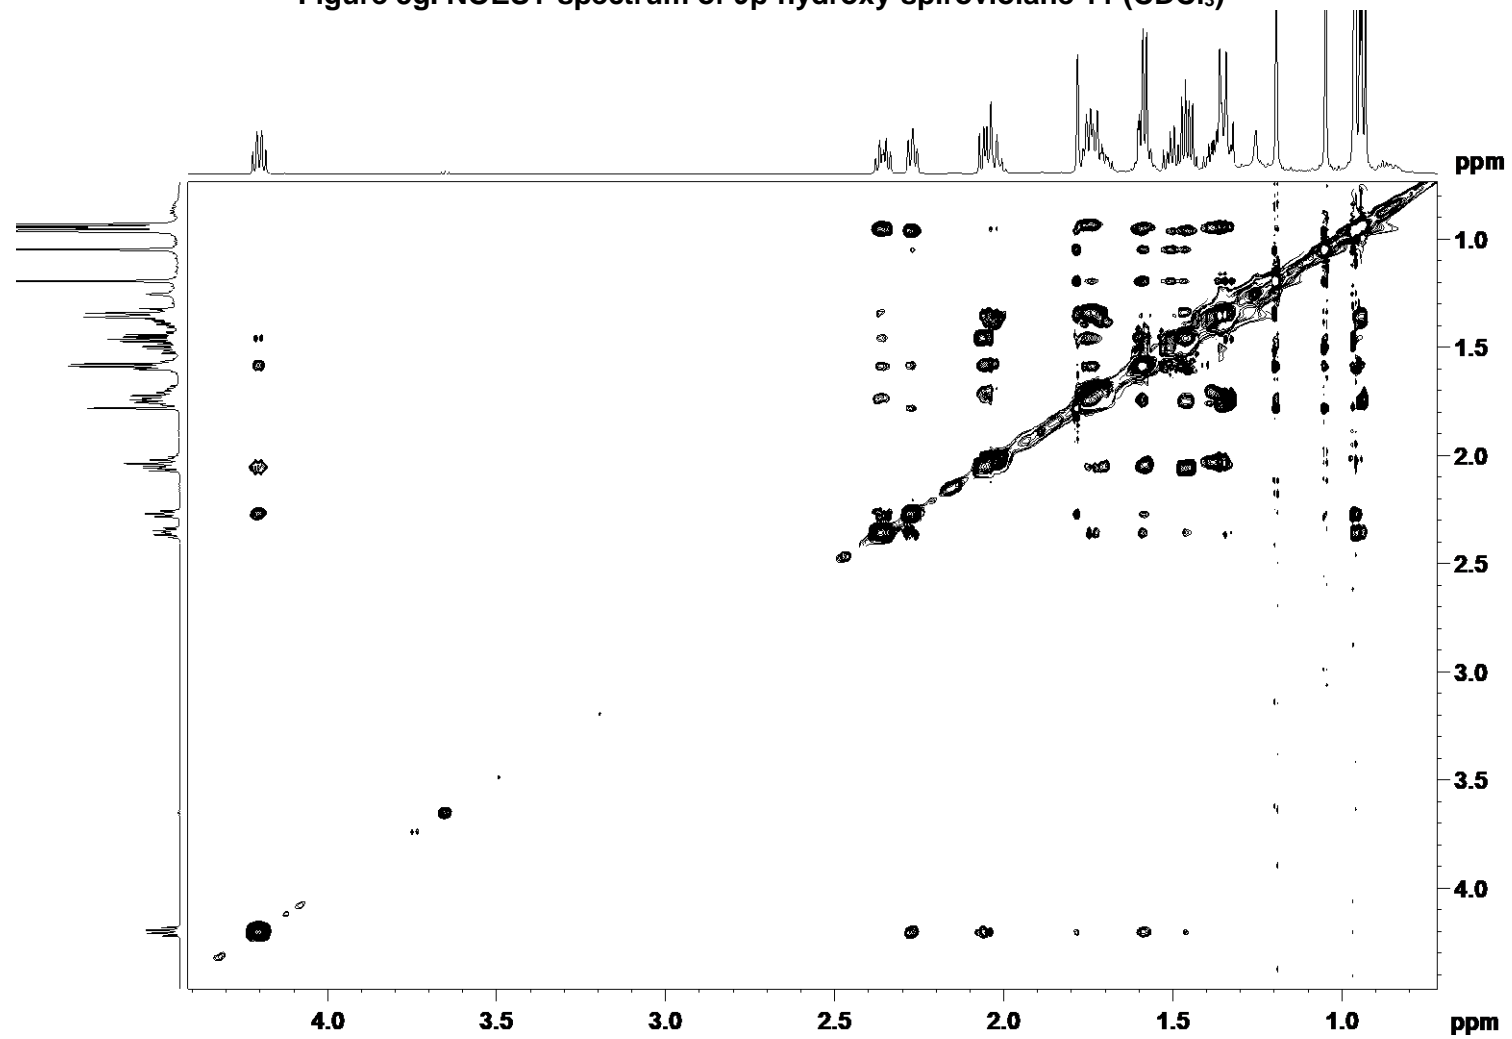

Figure 6a. <sup>1</sup>H NMR spectrum of 9α-hydroxy-spiroviolane 10 (600 MHz, CDCl<sub>3</sub>)

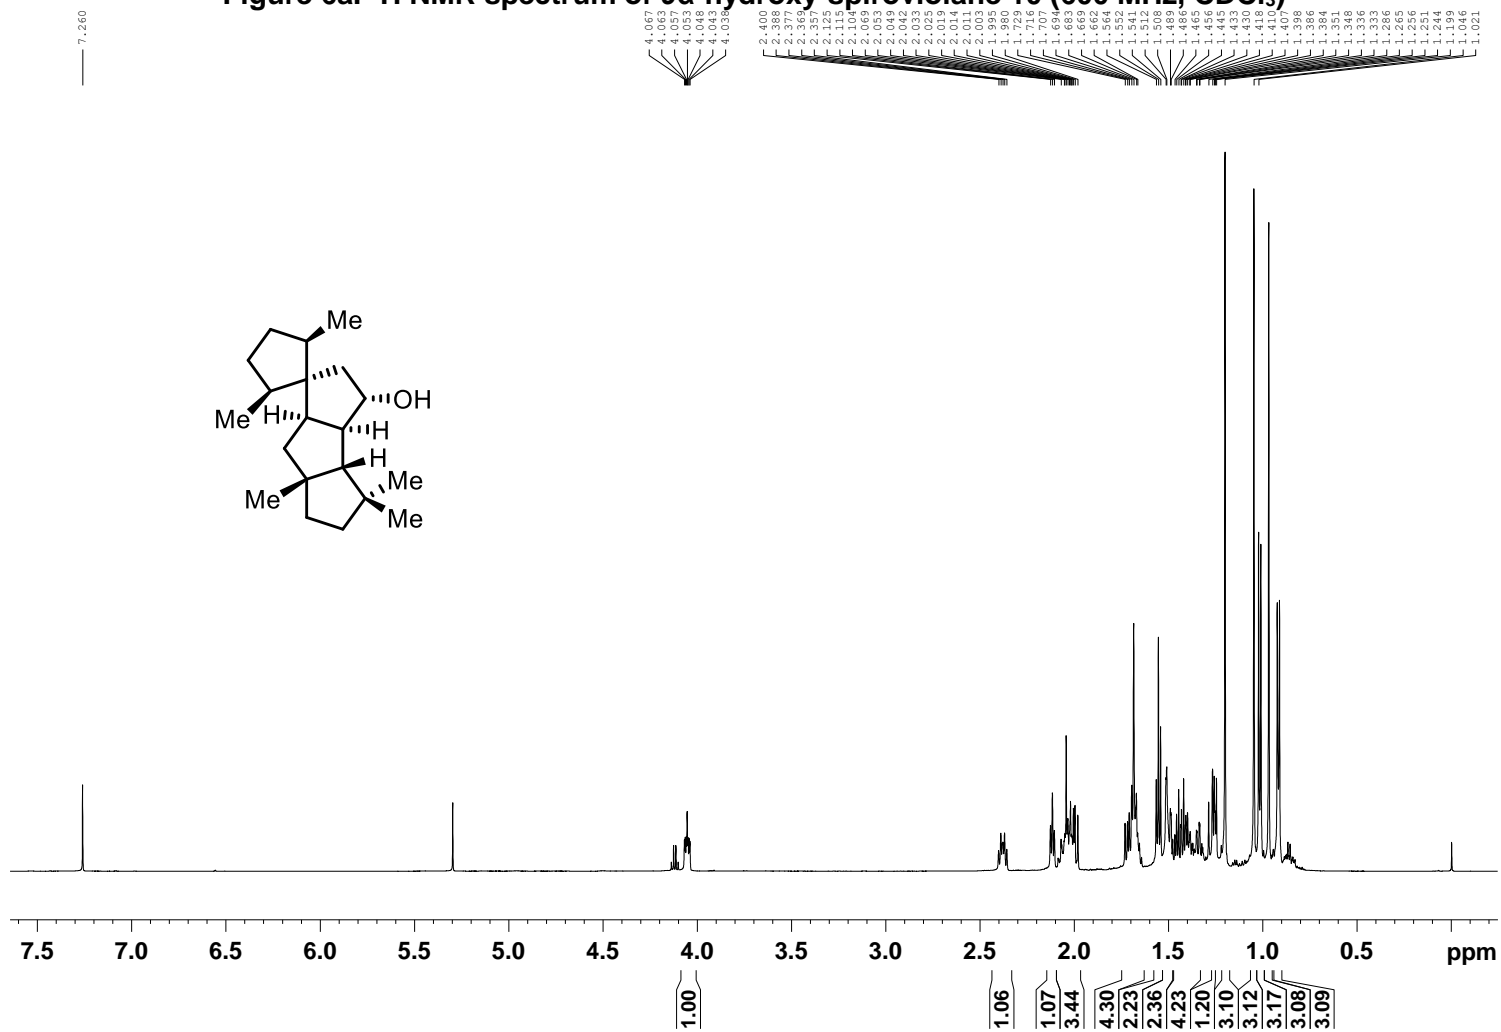



Figure 6b. <sup>1</sup>H NMR spectrum of 9α-hydroxy-spiroviolane 10 (600 MHz, CDCl<sub>3</sub>)

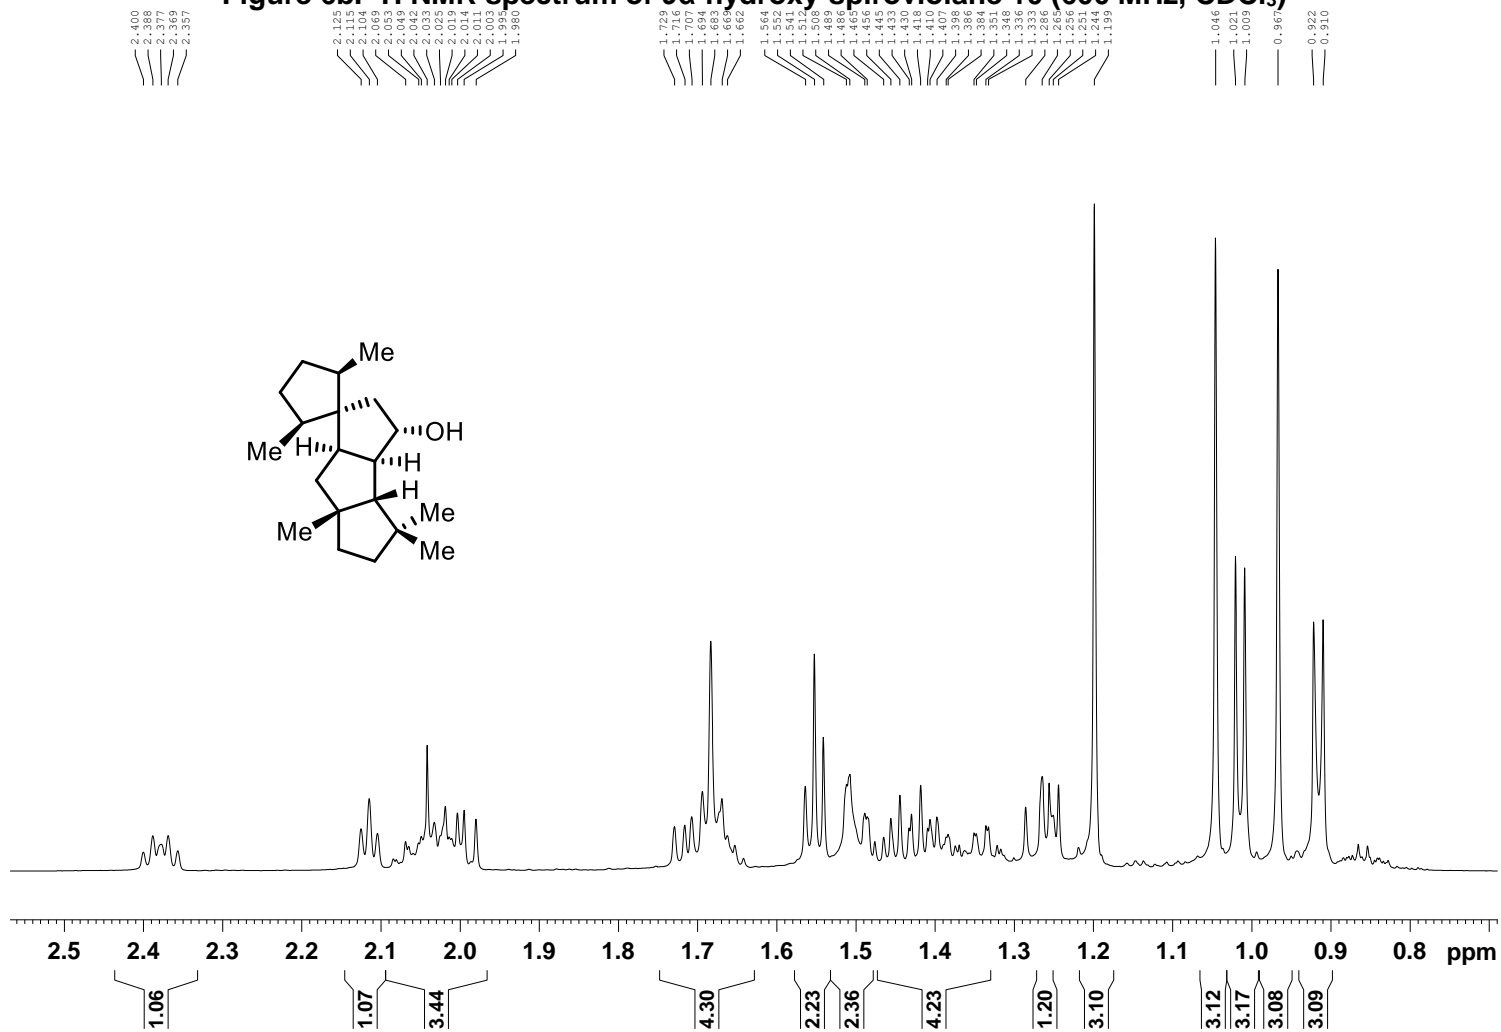

Figure 6c.  $^{13}\text{C}$  NMR spectrum of 9 $\alpha$ -hydroxy-spiroviolane 10 (150 MHz,  $\text{CDCl}_3$ )

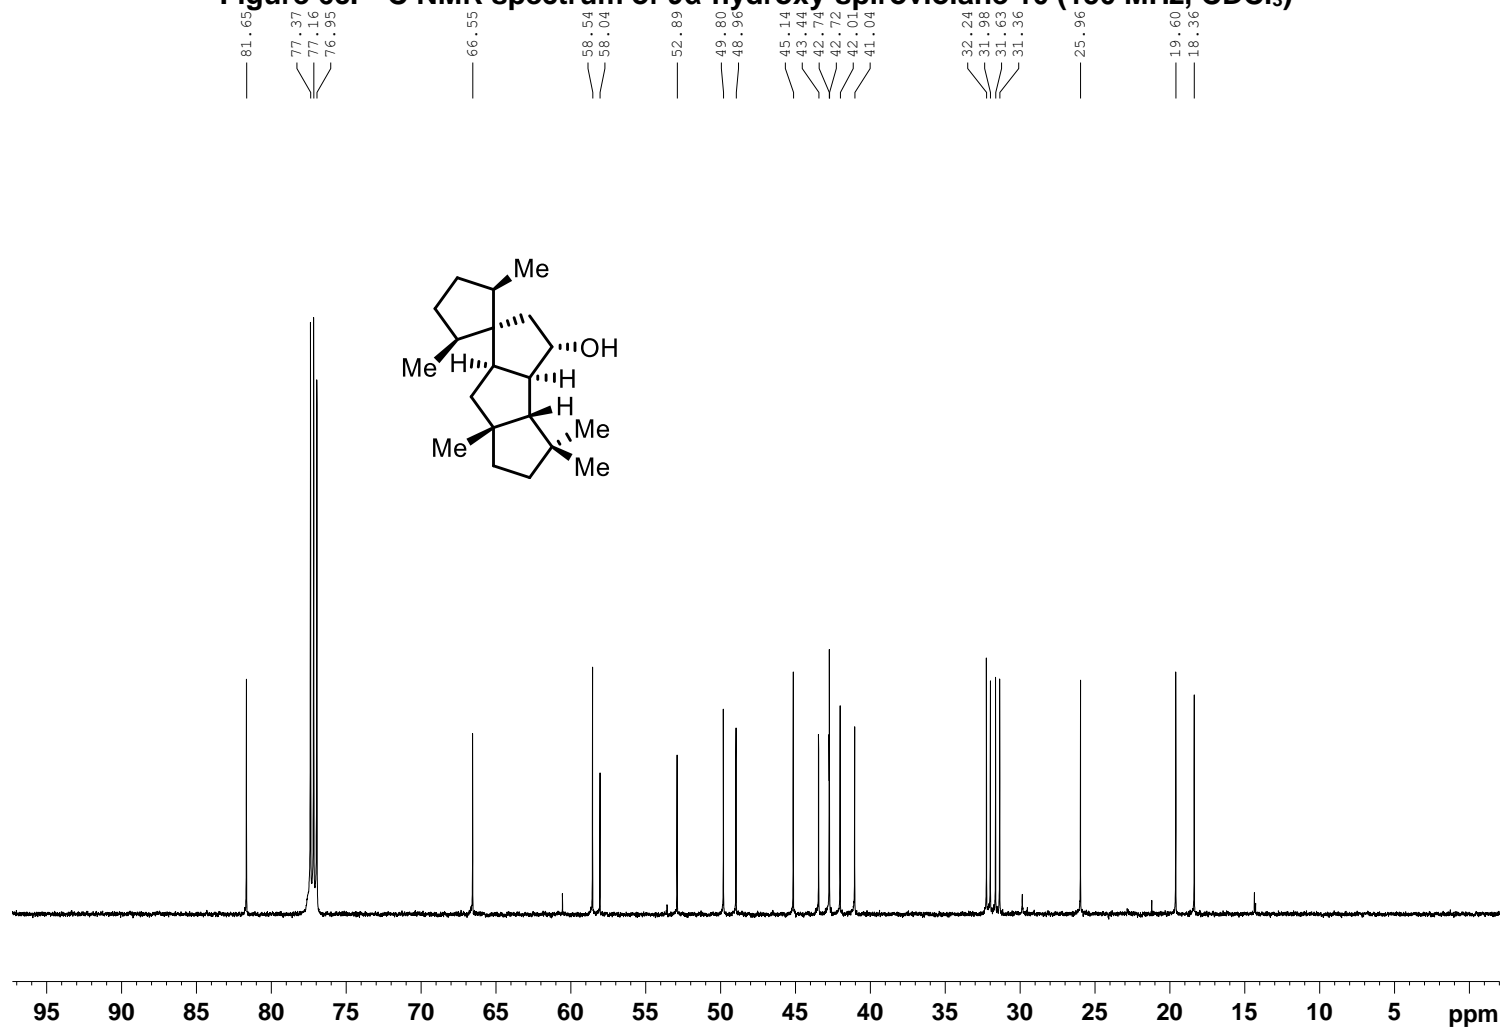

Figure 6d.  $^1\text{H}$ - $^1\text{H}$  COSY spectrum of 9 $\alpha$ -hydroxy-spiroviolane 10 ( $\text{CDCl}_3$ )

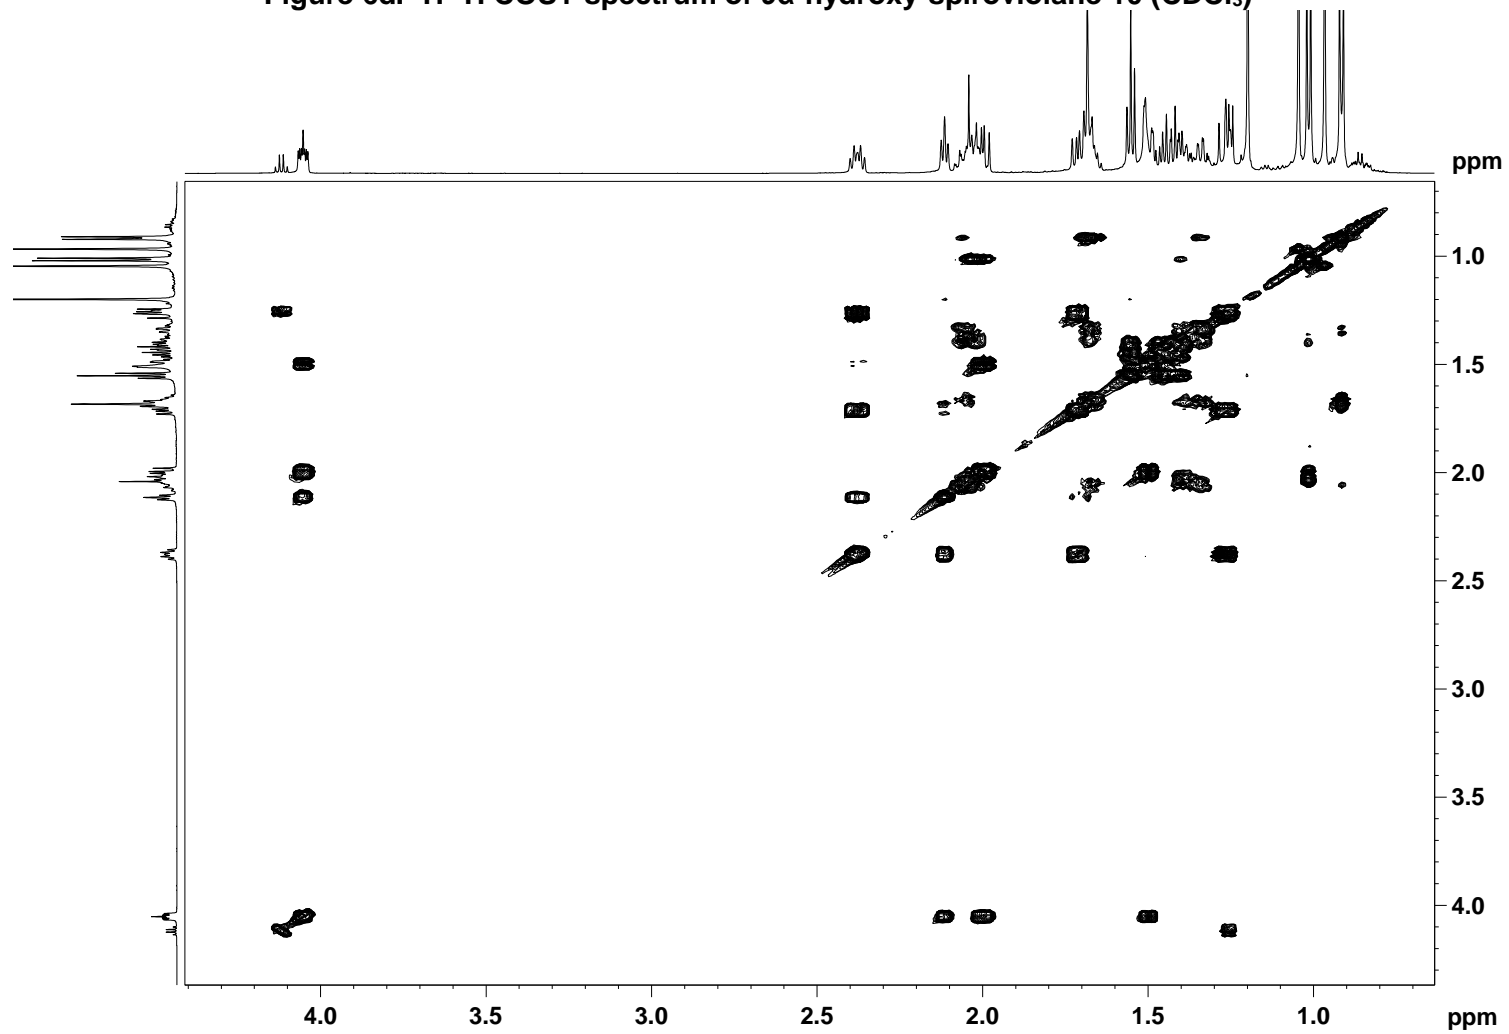

Figure 6e. HSQC spectrum of 9 $\alpha$ -hydroxy-spiroviolane 10 (CDCl<sub>3</sub>)

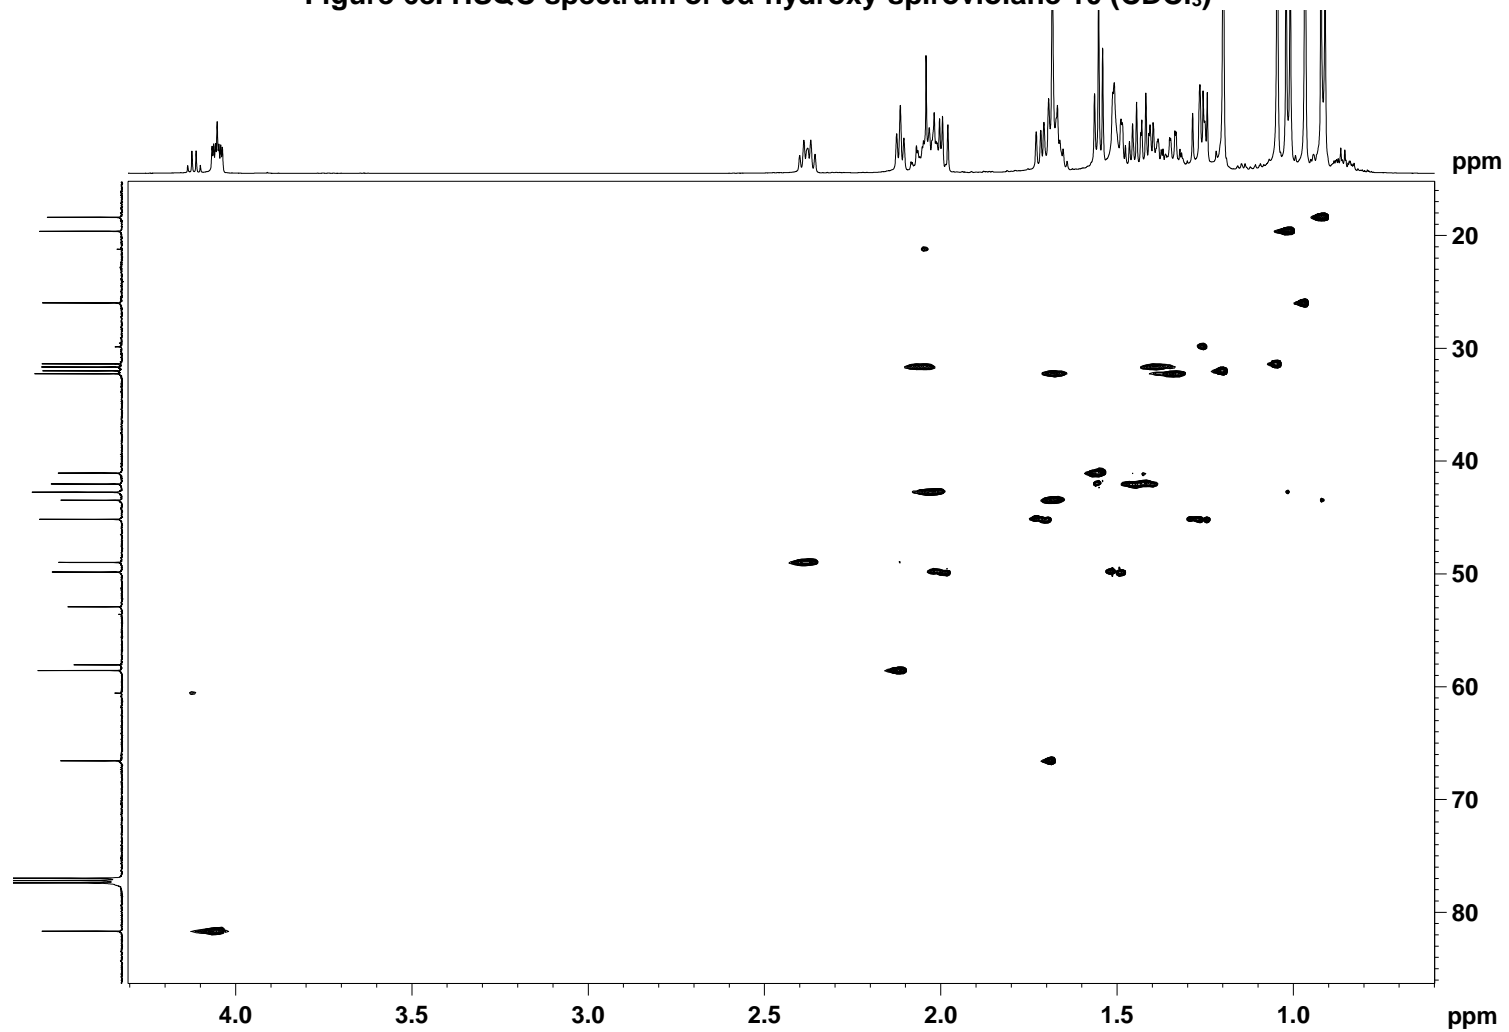

Figure 6f. HMBC spectrum of 9 $\alpha$ -hydroxy-spiroviolane 10 (CDCl<sub>3</sub>)

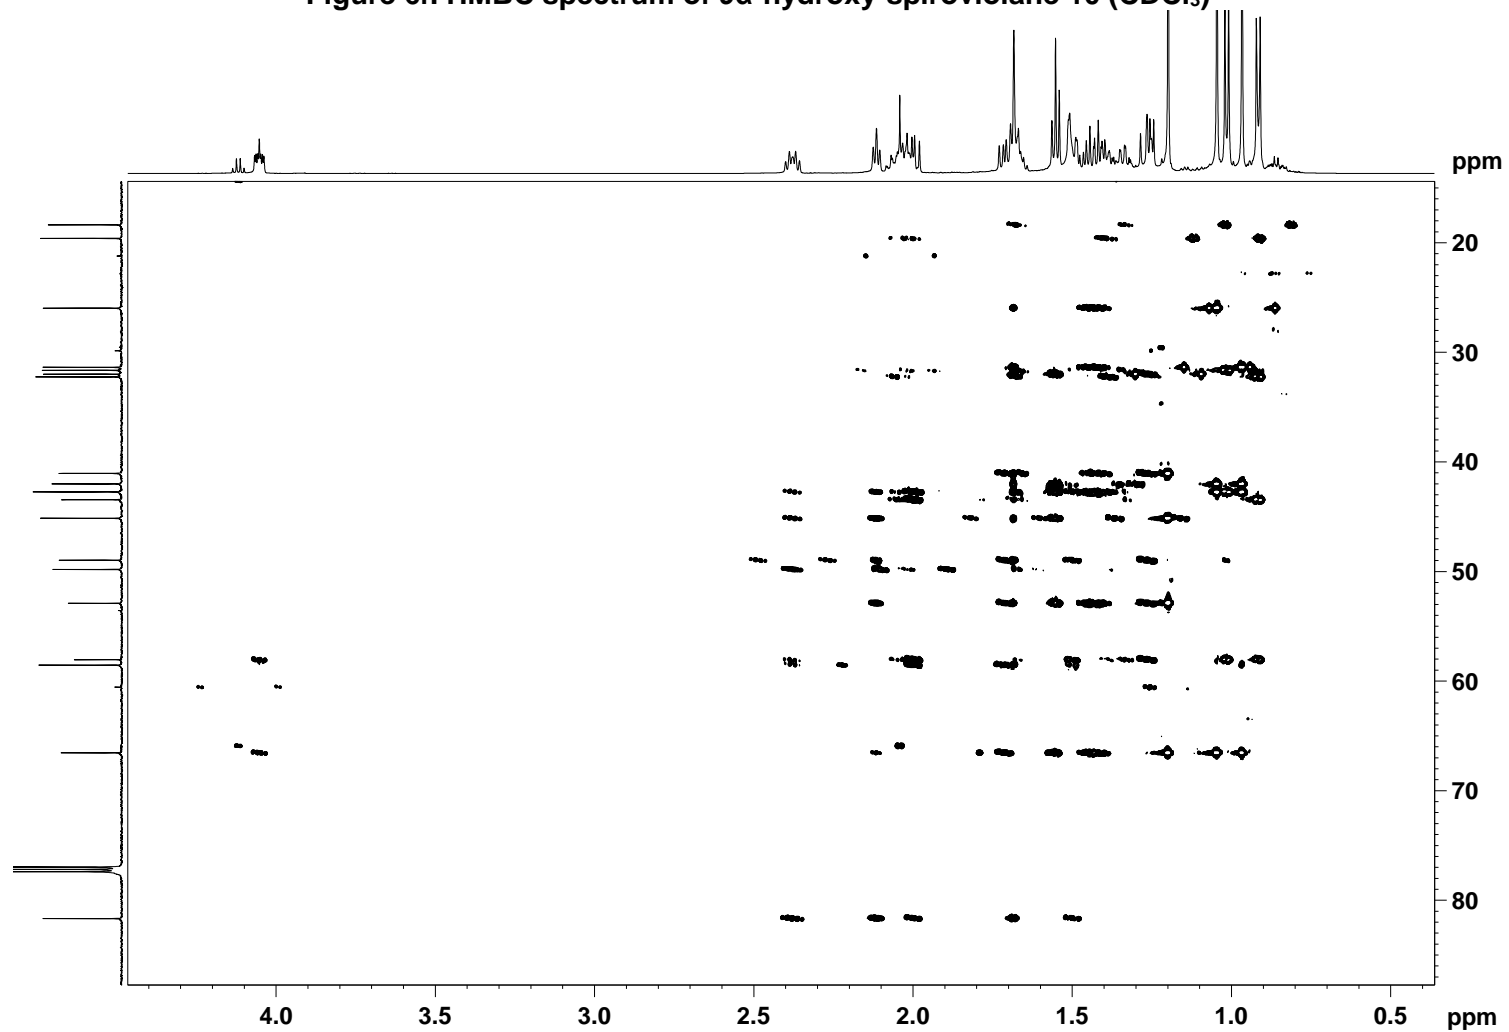

Figure 6g. NOESY spectrum of 9 $\alpha$ -hydroxy-spiroviolane 10 (CDCl<sub>3</sub>)

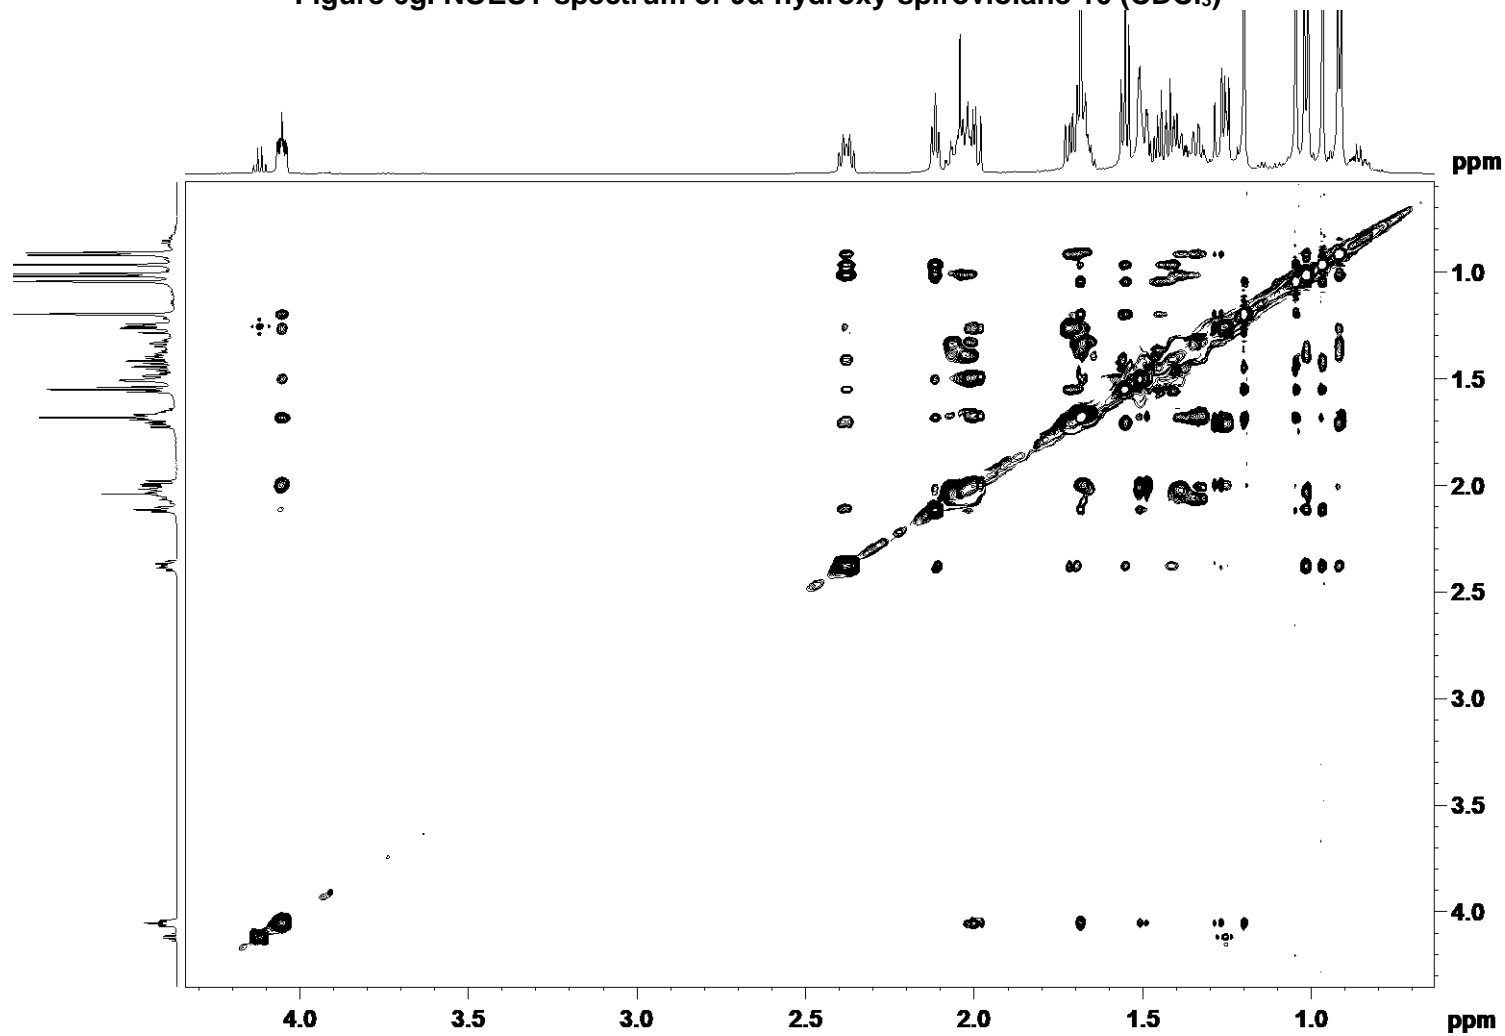

Figure 7a. <sup>1</sup>H NMR spectrum of compound 9-oxo-spiroviolane 12 (400 MHz, CDCl<sub>3</sub>)

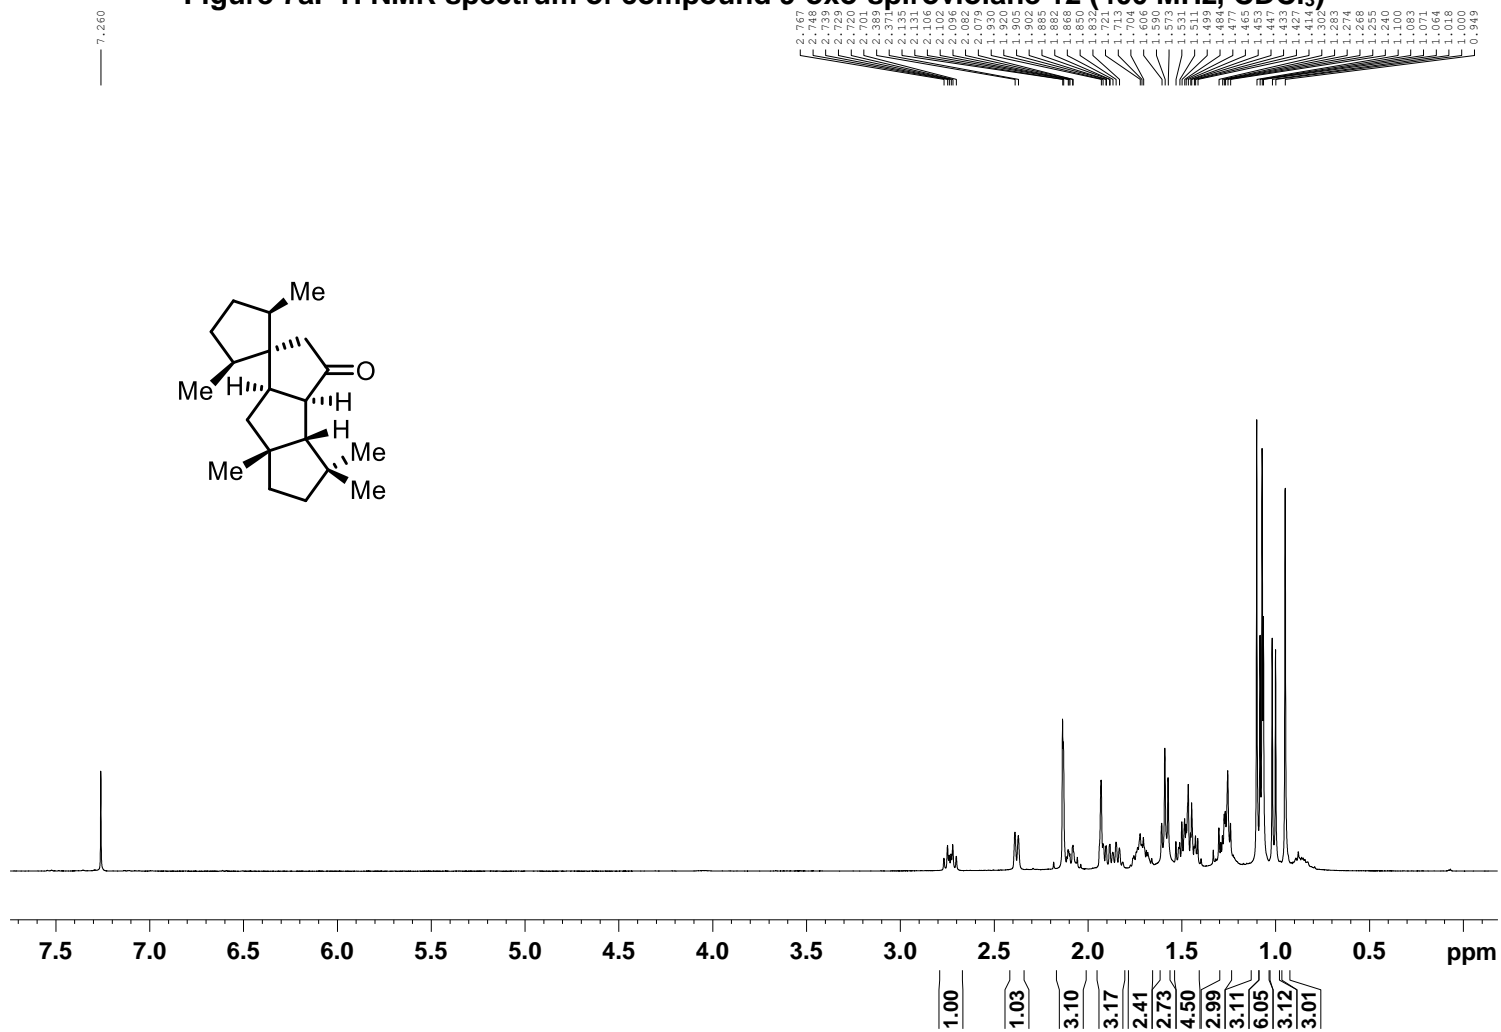

Figure 7b. <sup>1</sup>H NMR spectrum of compound 9-oxo-spiroviolane 12 (400 MHz, CDCl<sub>3</sub>)

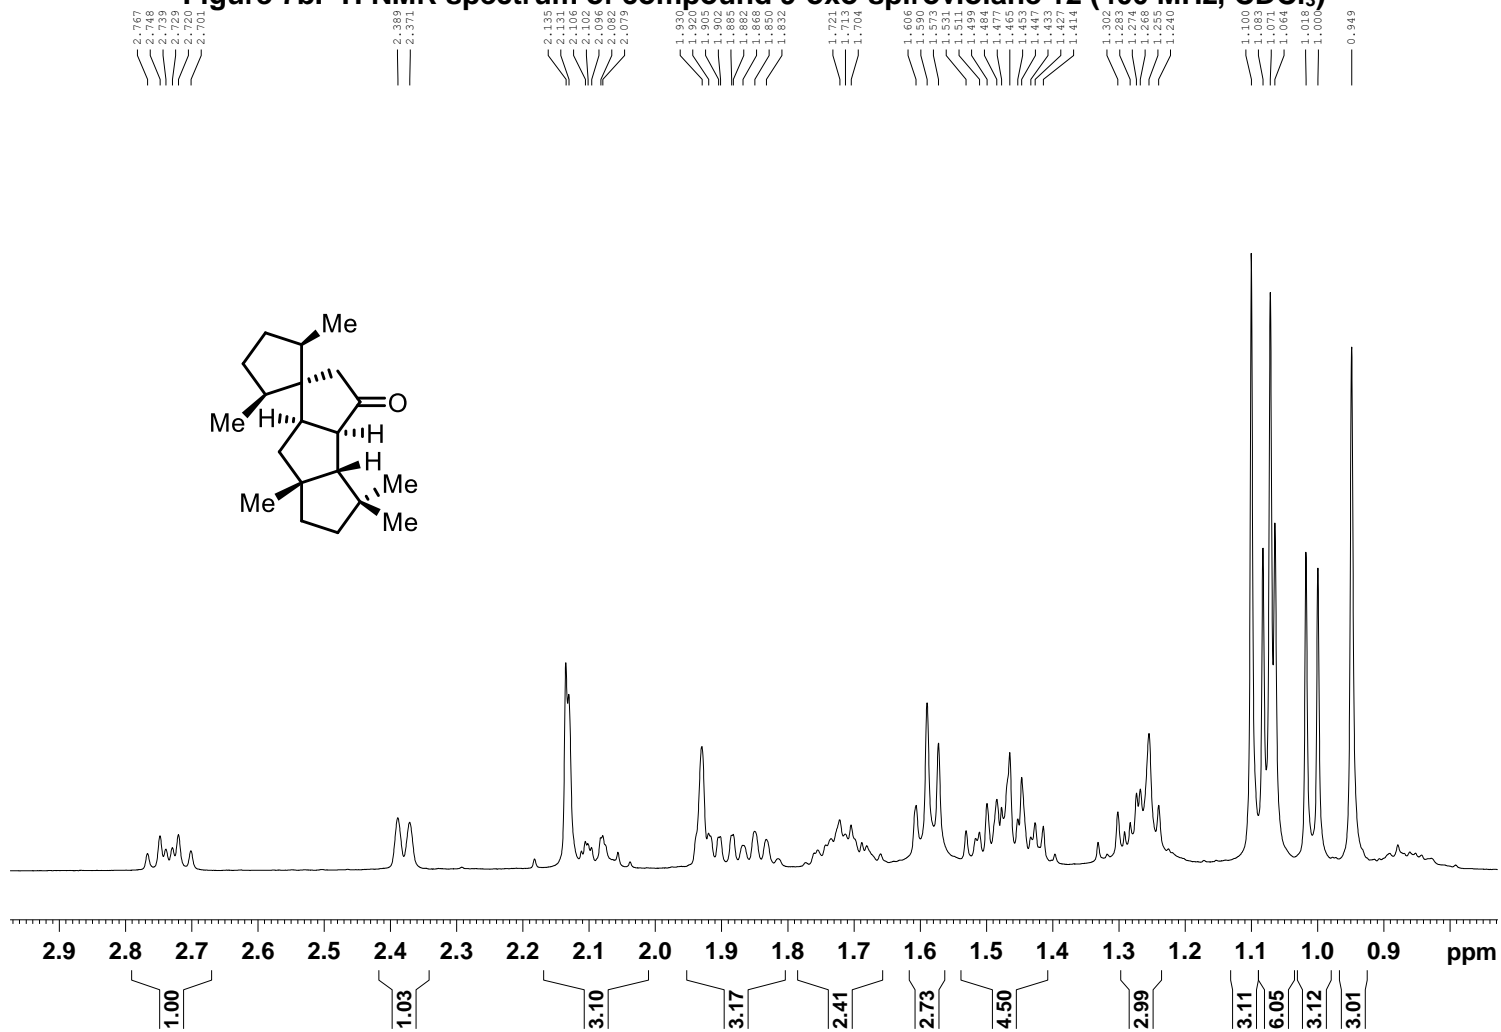

2.767  
2.748  
2.739  
2.720  
2.701  
2.389  
2.371  
2.185  
2.131  
2.116  
2.102  
2.096  
2.085  
1.930  
1.920  
1.904  
1.902  
1.885  
1.882  
1.860  
1.832  
1.721  
1.713  
1.704  
1.606  
1.590  
1.573  
1.571  
1.511  
1.499  
1.484  
1.465  
1.453  
1.447  
1.433  
1.414  
1.414  
1.302  
1.283  
1.274  
1.268  
1.255  
1.248  
1.100  
1.083  
1.071  
1.064  
1.018  
1.000  
0.949

2.9 2.8 2.7 2.6 2.5 2.4 2.3 2.2 2.1 2.0 1.9 1.8 1.7 1.6 1.5 1.4 1.3 1.2 1.1 1.0 0.9 ppm  
1.00  
1.03  
3.10  
3.17  
2.41  
2.73  
4.50  
2.99  
3.11  
6.05  
3.12  
3.01



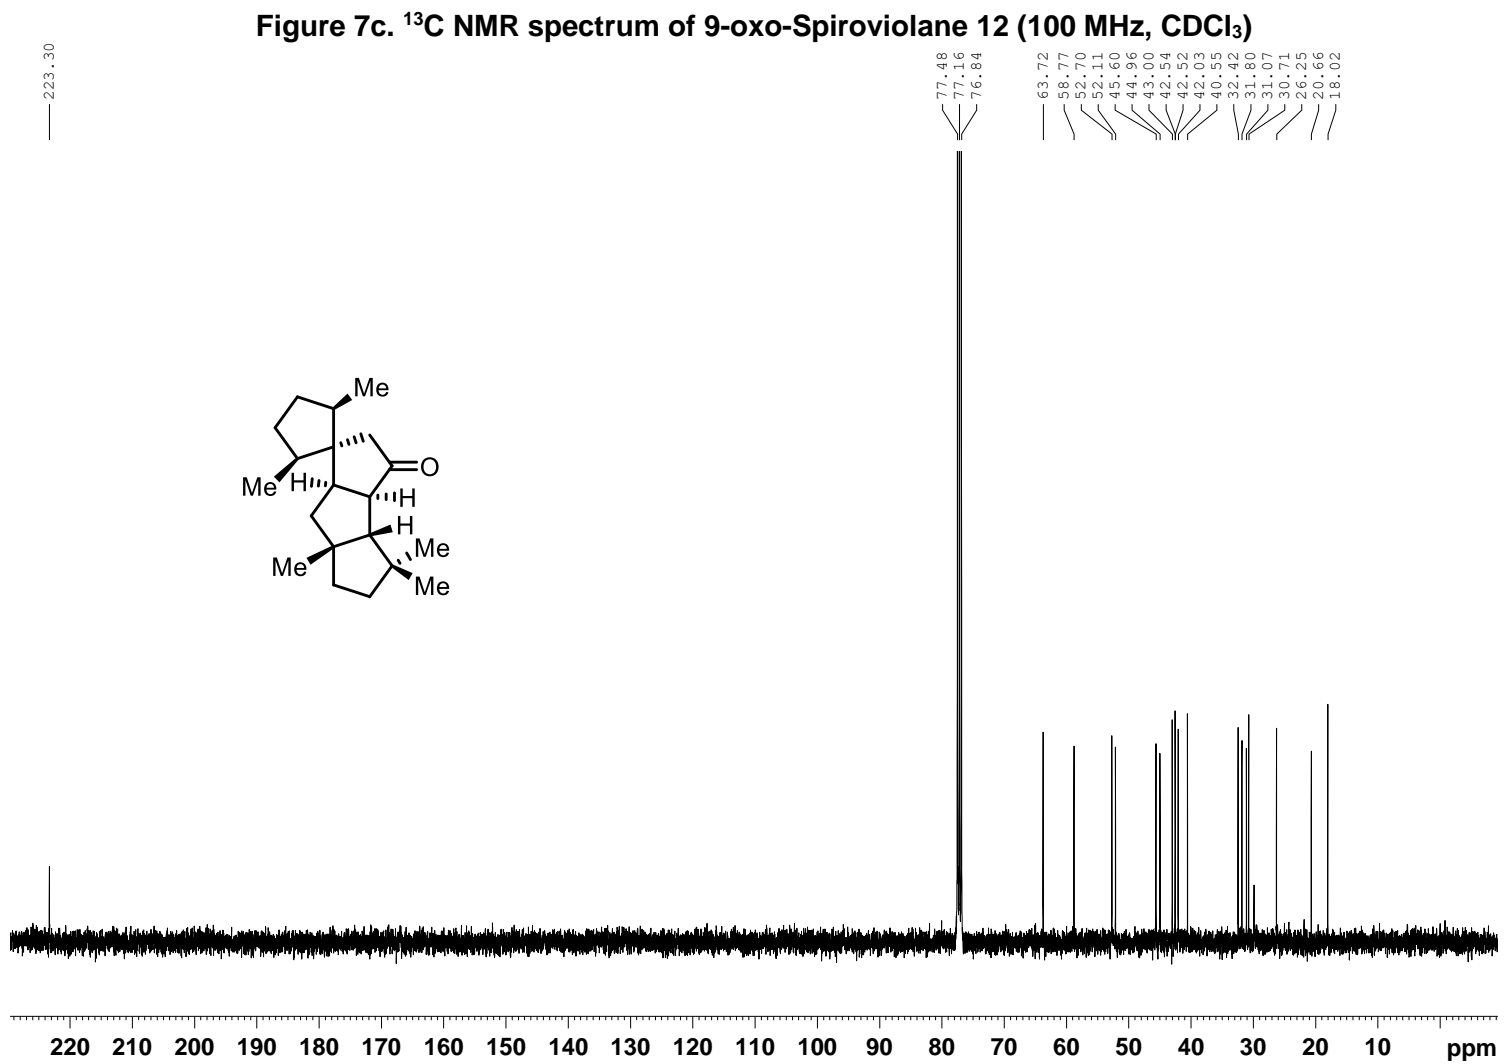

Figure 8a. <sup>1</sup>H NMR spectrum of compound 13 (400 MHz, CDCl<sub>3</sub>)

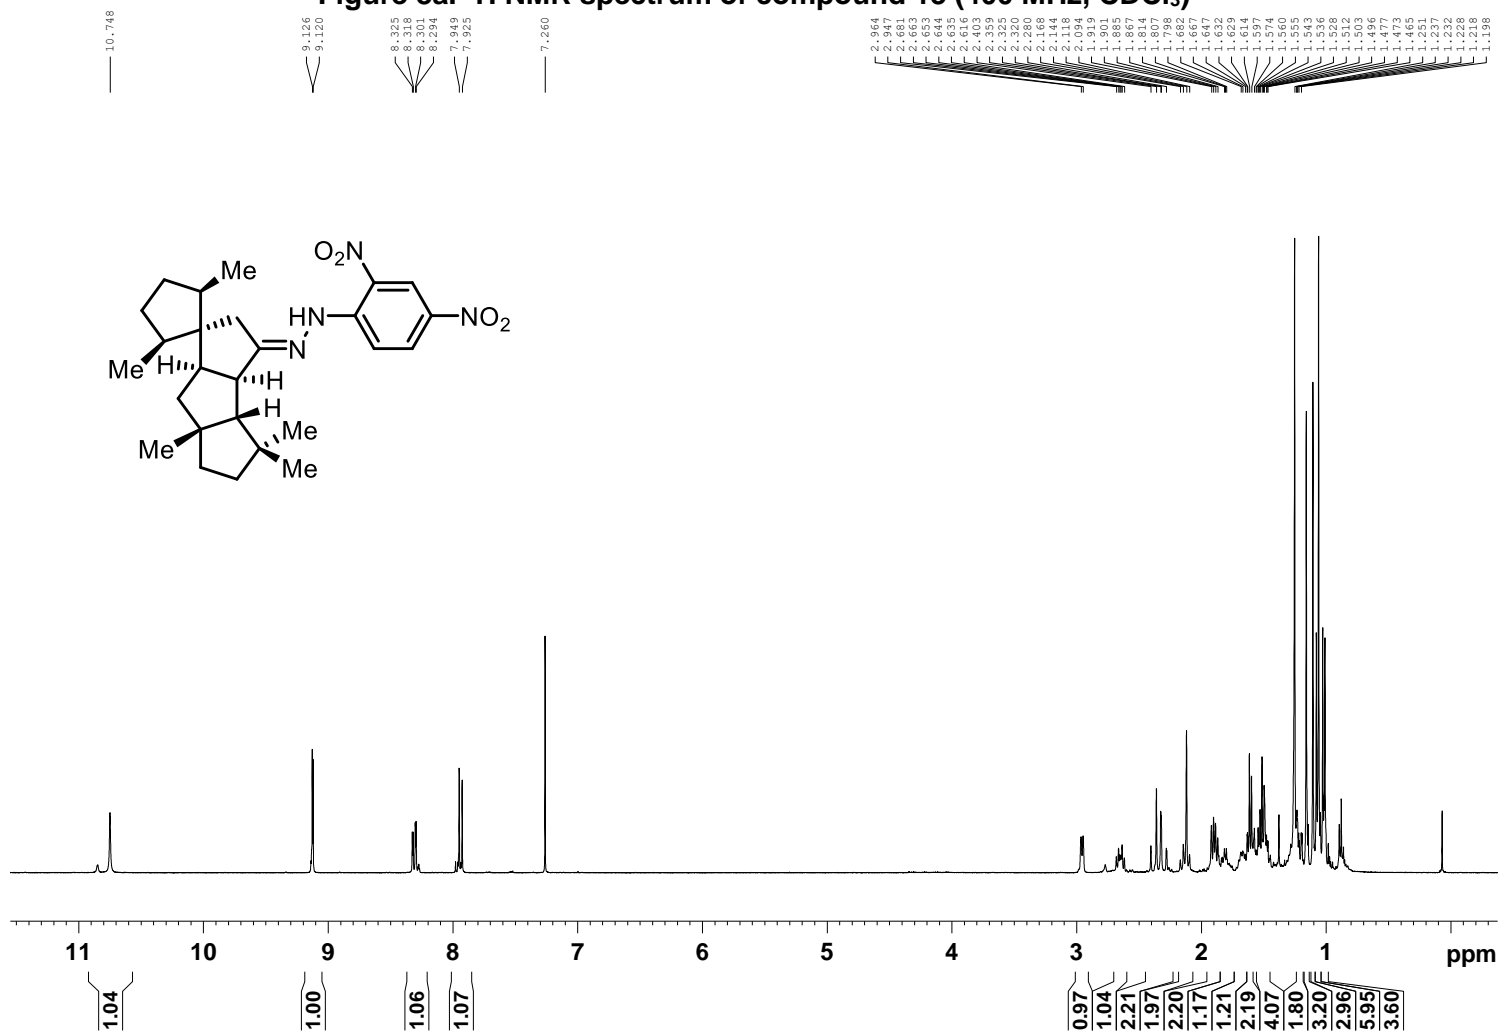

Figure 8b. <sup>1</sup>H NMR spectrum of compound 13 (400 MHz, CDCl<sub>3</sub>)

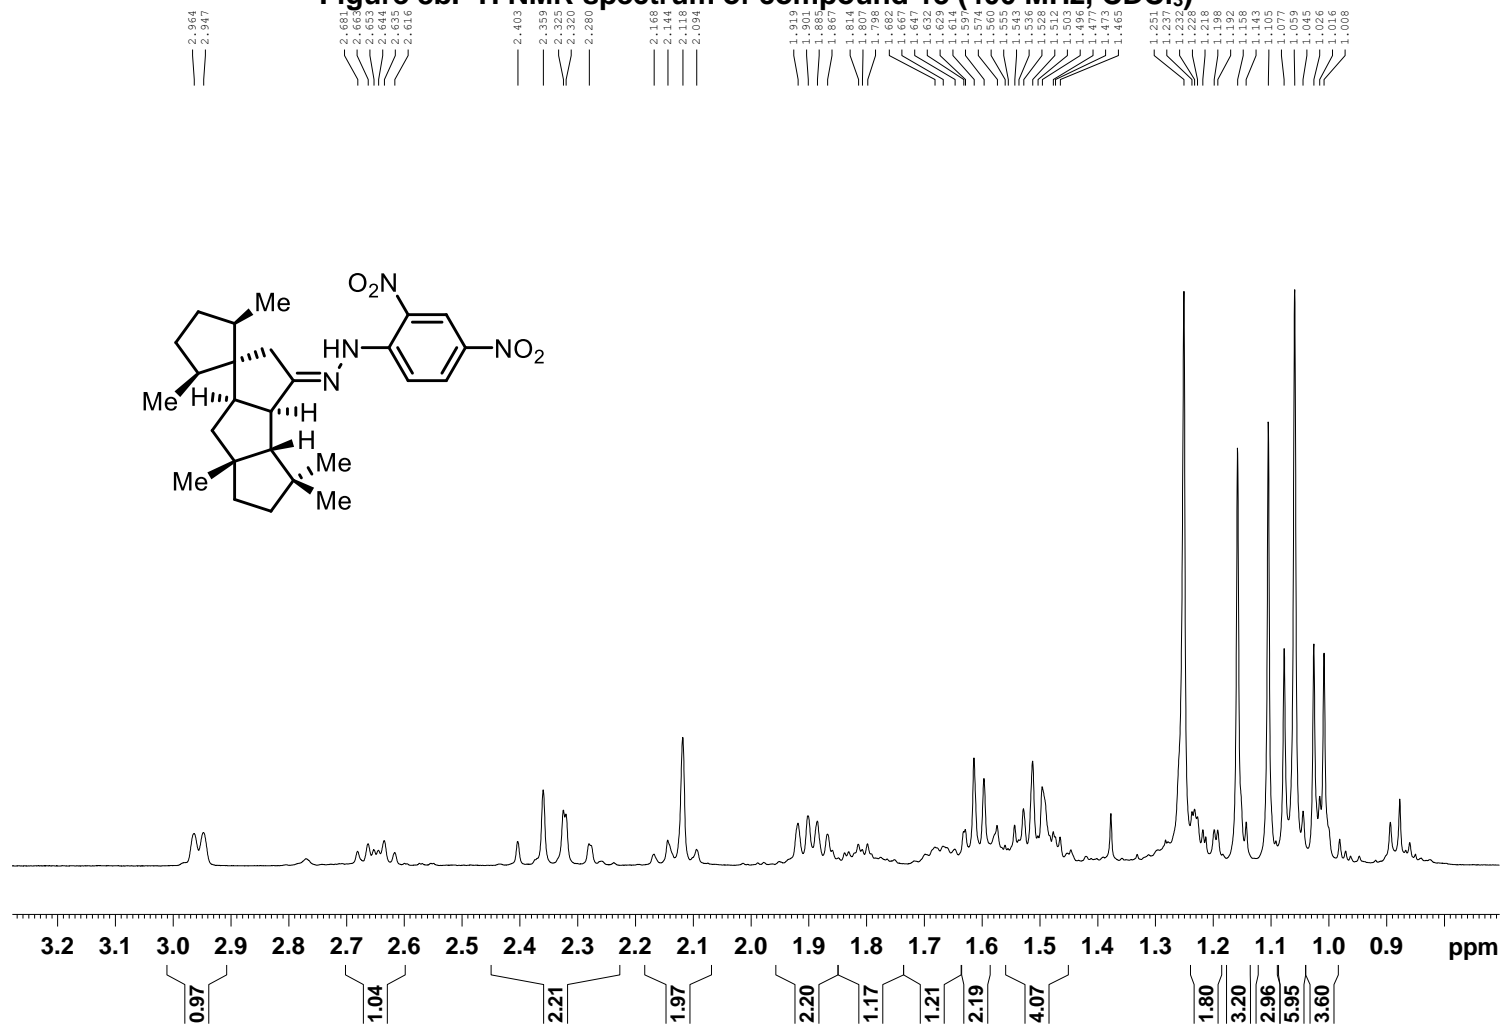

Figure 8c. <sup>13</sup>C NMR spectrum of compound 13 (100 MHz, CDCl<sub>3</sub>)

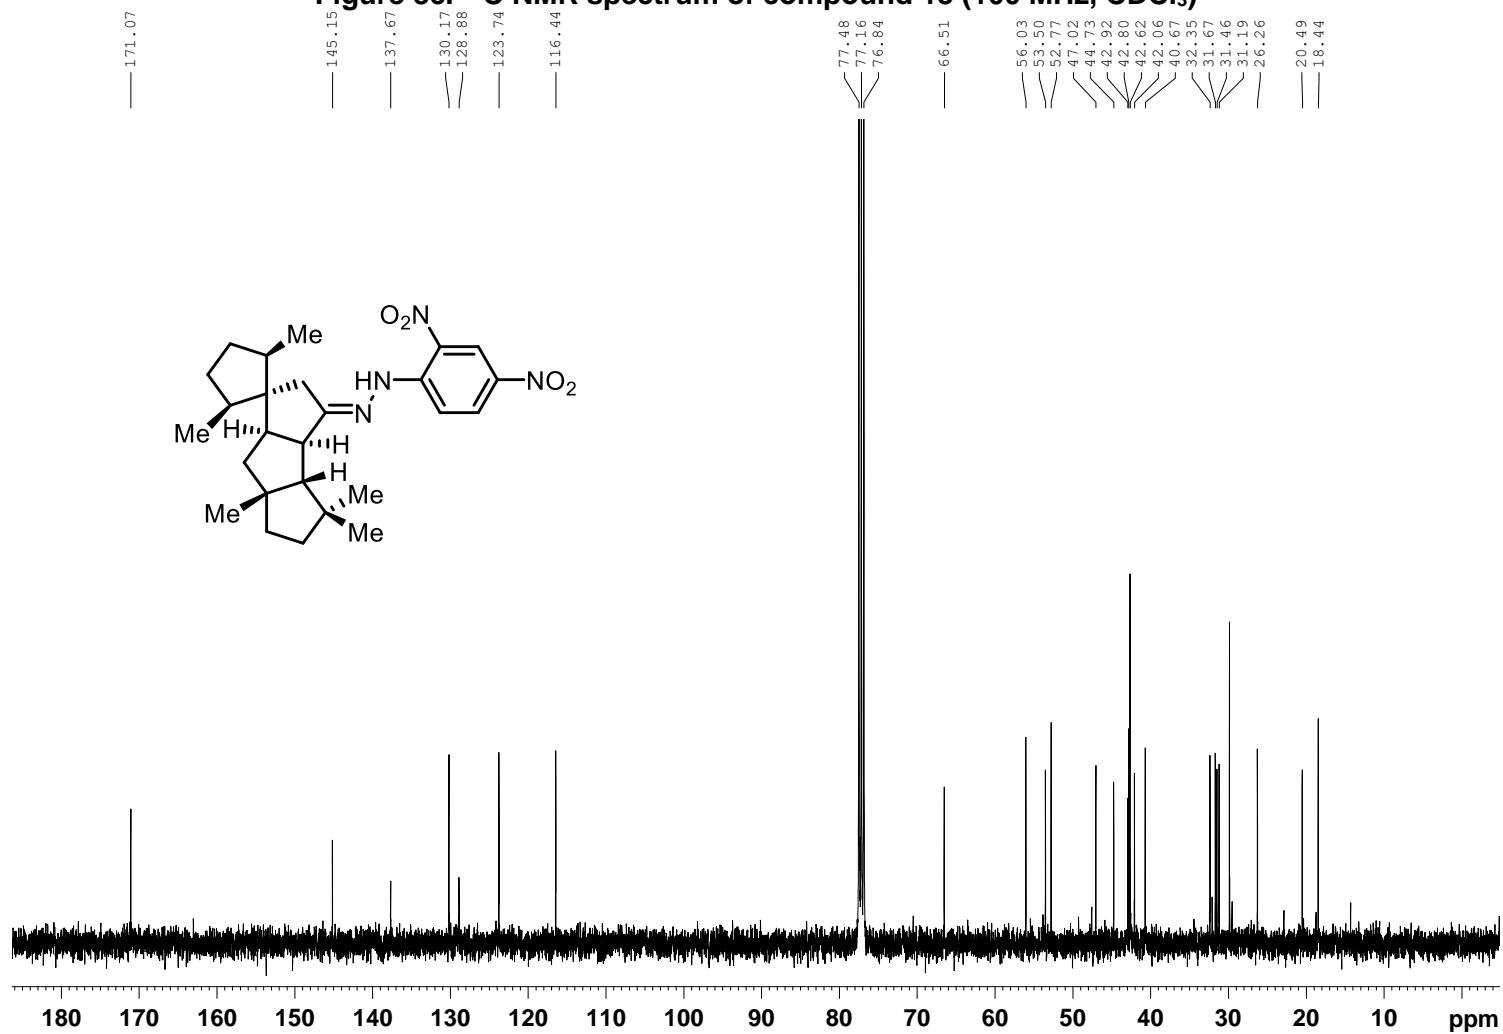

171.07

145.15

137.67

130.17

128.88

123.74

116.44

77.48

77.16

76.84

66.51

56.03

53.50

52.77

47.02

44.73

42.92

42.80

42.62

42.06

40.67

32.35

31.67

31.46

31.19

26.26

20.49

18.44

180 170 160 150 140 130 120 110 100 90 80 70 60 50 40 30 20 10 ppm

## References

1. Kieser, T.; Bibb, M. J.; Buttner, M. J.; Chater, K. F.; Hopwood, D. A. Practical Streptomyces genetics. The John Innes Foundation, Norwich. **2000**.
2. Agilent Technologies, CrysAlisPro, Version 1.171.37.35. Yarnton, Oxfordshire, United Kindom, **2014**.
3. Dolomanov, O. V.; Bourhis, L. J.; Gildea, R. J.; Howard, J. A. K.; Puschmann, H. OLEX2: a complete structure solution, refinement and analysis program. *J. Appl. Cryst.* **2009**, *42*, 339-341.
4. *Sheldrick, G. M.* Crystal structure refinement with SHELXL. *Acta Crystallogr. C*, **2015**, *71*, 3-8.
5. Rabe, P.; Rinkel, J.; Dolja, E.; Schmitz, T.; Nubbemeyer, B.; Luu, T. H.; Dickschat, J. S. Mechanistic investigations of two bacterial diterpene cyclases: spiroviolene synthase and tsukubadiene synthase. *Angew. Chem. Int. Ed.* **2017**, *56*, 2776-2779.
6. Chi, H. M.; Cole, C. J. F.; Hu, P.; Taylor, C. A.; Snyder, S. A. Total syntheses of spiroviolene and spirograterpene A: a structural reassignment with biosynthetic implications. *Chem. Sci.* **2020**, *11*, 10939-10944.
7. Hearn, M. J.; Lebold, S. A.; Sinha, A.; Sy, K. Preparation and absorption spectra of arylhydrazones from  $\alpha,\beta$ -unsaturated carbonyl compounds. *J. Org. Chem.* **1989**, *54*, 4188-4193.
8. Xu, H.; Dickschat, J. S. Revision of the cyclisation mechanism for the diterpene spiroviolene and investigations of its mass spectrometric fragmentation. *ChemBioChem* **2021**, *22*, 850-854.
